# Supplementary material for: Risk of recurrent spontaneous preterm birth: a systematic review and meta-analysis
Source: PubMed Central journal article supplement — BMJ Open. 2017 Jul 5;7(6):e015402. doi: 10.1136/bmjopen-2016-015402 (PMC5734267; doi:10.1136/bmjopen-2016-015402), 2017-07-05
Supplement: bmjopen-2016-015402.draft_revisions.pdf [file bmjopen-2016-015402.draft_revisions.pdf]

# BMJ Open

## Risk of Recurrent Spontaneous Preterm Birth: A Systematic Review and Meta-Analysis

|                                 |                                                                                                                                                                                                   |
|---------------------------------|---------------------------------------------------------------------------------------------------------------------------------------------------------------------------------------------------|
| Journal:                        | <i>BMJ Open</i>                                                                                                                                                                                   |
| Manuscript ID                   | bmjopen-2016-015402                                                                                                                                                                               |
| Article Type:                   | Research                                                                                                                                                                                          |
| Date Submitted by the Author:   | 01-Dec-2016                                                                                                                                                                                       |
| Complete List of Authors:       | Phillips, Courtney; University of Calgary<br>Velji, Zain; University of Calgary<br>Hanly, Ciara; University of British Columbia<br>Metcalf, Amy; University of Calgary, Obstetrics and Gynecology |
| <b>Primary Subject Heading</b>: | Obstetrics and gynaecology                                                                                                                                                                        |
| Secondary Subject Heading:      | Obstetrics and gynaecology, Epidemiology, Evidence based practice, Paediatrics                                                                                                                    |
| Keywords:                       | EPIDEMIOLOGY, NEONATOLOGY, OBSTETRICS, PAEDIATRICS                                                                                                                                                |
|                                 |                                                                                                                                                                                                   |

SCHOLARONE™  
Manuscripts

Peer Review Only

## Risk of Recurrent Spontaneous Preterm Birth: A Systematic Review and Meta-Analysis

Ms. Courtney PHILLIPS<sup>1</sup> BSc, Ms. Zain VELJI<sup>2</sup> BSc, Ms. Ciara HANLY<sup>3</sup>, Dr. Amy METCALFE<sup>4,5</sup> PhD

<sup>1</sup>Cumming School of Medicine, University of Calgary, Calgary, Alberta, Canada

<sup>2</sup>Faculty of Nursing, University of Calgary, Calgary, Alberta, Canada

<sup>3</sup>School of Kinesiology, University of British Columbia, Vancouver, British Columbia, Canada

<sup>4</sup>Department of Obstetrics and Gynecology, University of Calgary, Calgary, Alberta, Canada

<sup>5</sup>Department of Community Health Sciences, University of Calgary, Calgary, Alberta, Canada

### Address for Correspondence:

Amy Metcalfe

Foothills Medical Centre, 4<sup>th</sup> Floor North Tower

1403 29 St NW

Calgary, Alberta, Canada

T2N 2T9

Email: [amy.metcalfe@albertahealthservices.ca](mailto:amy.metcalfe@albertahealthservices.ca)

Phone: 403-944-8458

**Short Title:** Risk of Recurrent Spontaneous Preterm Birth

**Condensation:** The risk of recurrent spontaneous preterm birth is high, and tends to reoccur more frequently following preterm labor than preterm premature rupture of membranes.

**Conflict of Interest:** The authors have no conflicts of interest to report

**Contributorship Statement:** All authors made a substantial contribution to this study. CP, ZV and CH conducted the systematic review. CP drafted the manuscript. AM designed the study and conducted the meta-analysis. All authors critically reviewed the manuscript, interpreted the findings, and approved the final version. All authors had full access to all of the data in the study and can take responsibility for the integrity of the data and the accuracy of the data analysis. As the senior author AM affirms that the manuscript is an honest, accurate, and transparent account of the study being reported, that no important aspects of the study have been omitted, and that any discrepancies from the study as planned have been explained.

**Data Sharing Agreement:** No additional data is available

**Exclusive License:** The Corresponding Author has the right to grant on behalf of all authors and does grant on behalf of all authors, a worldwide licence to the Publishers and its licensees in perpetuity, in all forms, formats and media (whether known now or created in the future), to i) publish, reproduce, distribute, display and store the Contribution, ii) translate the Contribution into other languages, create adaptations, reprints, include within collections and create summaries, extracts and/or, abstracts of the Contribution and convert or allow conversion into any format including without limitation audio, iii) create any other derivative work(s) based in whole or part on the on the Contribution, iv) to exploit all subsidiary rights to exploit all subsidiary rights that currently exist or as may exist in the future in the Contribution, v) the

1  
2  
3 inclusion of electronic links from the Contribution to third party material where-ever it may be  
4 located; and, vi) licence any third party to do any or all of the above.  
5  
6

7 **Funding:** This study was funded by the Alberta Children's Hospital Research Institute. Amy  
8 Metcalfe is supported by a New Investigator Award from the Canadian Institutes of Health  
9 Research. The funder had no role in study design, execution, or publication decisions.  
10

11 **Word Count (Abstract):** 236

12 **Word Count (Manuscript):** 1959

13 **Number of References:** 51

14 **Number of Tables:** 0

15 **Number of Figures:** 3

16 **Number of Appendices:** 3  
17  
18  
19  
20  
21  
22  
23  
24  
25  
26  
27  
28  
29  
30  
31  
32  
33  
34  
35  
36  
37  
38  
39  
40  
41  
42  
43  
44  
45  
46  
47  
48  
49  
50  
51  
52  
53  
54  
55  
56  
57  
58  
59  
60

**Abstract**

*Objective:* To determine the risk of recurrent spontaneous preterm birth following spontaneous preterm birth in singleton pregnancies.

*Design:* Systematic review and meta-analysis using random effects models.

*Data Sources:* An electronic literature search was conducted in OVID Medline (1948-2016), Embase (1980-2016), and ClinicalTrials.gov (completed studies effective 2016), supplemented by hand-searching bibliographies of included studies, to find all studies with original data concerning recurrent spontaneous preterm birth.

*Study Eligibility Criteria:* Studies had to include women with at least one spontaneous preterm singleton live birth (<37 weeks) and at least one subsequent pregnancy resulting in a singleton live birth. The Newcastle-Ottawa Scale and Jadad Scale were used to assess the study quality of cohort studies and randomized controlled trials respectively.

*Results:* Overall, 31 articles involving 55,016 women, met all inclusion criteria. Generally studies were well conducted and had a low risk of bias. The absolute risk of recurrent spontaneous preterm birth at <37 weeks gestation was 30.0% (95% CI: 27.0-34.0%). The risk of recurrence due to preterm premature rupture of membranes (PPROM) at <37 weeks gestation was 7.0% (95% CI: 6.0-9.0%), while the risk of recurrence due to preterm labor at <37 weeks gestation was 23.0% (95% CI: 13.0-33.0%).

*Conclusions:* The risk of recurrent spontaneous preterm birth is high and is influenced by the underlying clinical pathway leading to the birth. This information is important for clinicians when discussing the recurrence risk of spontaneous preterm birth with their patients.

**Key Words:** preterm birth, preterm labor, preterm premature rupture of membranes, recurrence, systematic review

### Article Summary – Strengths and Limitations of This Study:

- Spontaneous preterm birth has a tendency to reoccur in subsequent pregnancies; however, wide variation in the rate of recurrence has been reported in observational studies. Our study suggests that the rate of recurrence of spontaneous preterm birth is approximately 30%, and that the underlying etiology of the index spontaneous preterm birth (i.e. preterm labor or preterm premature rupture of membranes) influences the recurrence risk
- Study strengths include the comprehensive search strategy with no language restrictions used in the nature of the systematic review.
- Limitations primarily relate to the underlying data that was available on this top. Most of the included studies were observational in nature. Additionally, many primary studies examining the recurrence risk of preterm birth had to be excluded as they did not clearly differentiate between spontaneous and indicated preterm delivery.

## Introduction

Preterm birth (PTB) is defined as any live birth occurring before 37 completed weeks of gestation; this can be subdivided into extremely preterm (<28 weeks), very preterm (28-<32 weeks), moderately preterm (32-<34 weeks) and late preterm (34-<37 weeks) birth based on the gestational age at delivery (1). This sub-categorization is important as gestational age is inversely associated with increased mortality, morbidity and the intensity of neonatal care required at birth (2). Worldwide, 11.1% of infants are born preterm every year (2). Preterm birth is the leading cause of perinatal morbidity and mortality, and second most common cause of death, after pneumonia, in children under five years of age (3, 4).

Indicated preterm births (iPTB) are those induced for medical reasons, such as pre-eclampsia, intrauterine growth restriction or fetal distress. However, approximately 70% of PTB occur spontaneously (sPTB) (5). The clinical pathways that lead to sPTB include both preterm labor (PTL) and preterm premature rupture of membranes (PPROM). PTL is defined as regular contractions and cervical changes at less than 37 weeks gestation, and PPRM is defined as spontaneous rupture of membranes at least one hour before contractions at less than 37 weeks gestation (5). Known risk factors for spontaneous preterm birth include a previous preterm birth, black race, low maternal body-mass index, comorbidities, a short cervical length and a raised fetal fibronectin concentration (5, 6). Despite knowing these risk factors, our understanding of the etiology behind sPTB is poor and sPTB is considered to be multifactorial in nature (6, 7).

Although sPTB has a tendency to recur, little is known about the recurrence risk (7). This is of concern because sPTB is a leading cause of neonatal morbidity and mortality, and it also has a large economic burden (8). Further, women who have had a previous sPTB are likely to be anxious during their subsequent pregnancies, which itself can lead to sPTB and other adverse pregnancy outcomes (9-11). Therefore, we conducted a systematic review and meta-analysis to

1  
2  
3 investigate the absolute risk of recurrent sPTB following sPTB in singleton pregnancies. By  
4  
5 better understanding the recurrence risk of sPTB, healthcare workers may be better equipped to  
6  
7 manage patient needs and anxieties, as well as develop and apply preventative treatments.  
8  
9

## 10 11 **Methods**

12 Two study authors (ZV and CH) executed a comprehensive literature search of Medline (from  
13  
14 1946 to 2015) and Embase (from 1980 to 2015) to identify publications that contained key terms  
15  
16 related to recurrent sPTB in June 2015. The search was updated in July 2016, and expanded to  
17  
18 included completed studies identified through ClinicalTrials.gov. PPRM, PTL and related  
19  
20 terms were included in the search. For the full search strategy, please refer to Appendix A. Titles  
21  
22 and abstracts of these articles were screened for relevance to determine which articles were to  
23  
24 undergo full-text review. Two independent reviewers (ZV and CP) assessed the final eligibility  
25  
26 of the full-text reviewed articles. We resolved disagreements in full-text eligibility or data  
27  
28 abstraction by involvement of a third party (AM). The bibliographies of included studies were  
29  
30 reviewed to identify additional publications not found through the database search. A complete  
31  
32 summary of the search strategy can be found in Figure 1. No patients were directly involved in  
33  
34 this study. As this study only used published data, it was exempt from Institutional Review  
35  
36 Board approval.  
37  
38  
39  
40  
41  
42

43 All studies with original data concerning recurrent sPTB and  $N \geq 20$  were considered for  
44  
45 inclusion. No language restrictions were used. Conference abstracts were not considered. To be  
46  
47 included, studies had to include women with at least one spontaneous preterm live birth (delivery  
48  
49  $< 37$  weeks of gestation) in their obstetric history and at least one subsequent pregnancy resulting  
50  
51 in a live birth. Only studies looking at singleton pregnancies were included. Animal studies,  
52  
53  
54  
55  
56  
57  
58  
59  
60

1  
2  
3 studies that only included iPTB, studies that combined iPTB and sPTB, and studies on PPRM  
4  
5 or PTL where it was not clear if it resulted in sPTB were excluded.  
6  
7

8 The data extraction was completed independently by ZV and CP using a standardized  
9  
10 data extraction form. Data was reviewed by AM prior to analysis to ensure completeness.  
11  
12 Information on the authors, title, publication year, data year, location of study, study design,  
13  
14 definitions of preterm birth, and inclusion and exclusion criteria were all extracted. In addition,  
15  
16 information was extracted on the number of women with spontaneous preterm birth in their  
17  
18 initial pregnancy, whether due to PPRM or PTL, number of women with term births in  
19  
20 subsequent pregnancies, and number of women with preterm births in subsequent pregnancies,  
21  
22 whether due to PPRM, PTL or indicated causes. For studies that reported on total reproductive  
23  
24 history, only data on the first 2 consecutive pregnancies were extracted. The Newcastle-Ottawa  
25  
26 Scale (12) and the Jadad Scale (13) were used to assess study quality of cohort studies and  
27  
28 randomized controlled trials respectively.  
29  
30  
31  
32  
33

34 The primary outcome measured was the recurrence rate of sPTB at <37 weeks gestation.  
35  
36 Secondary outcomes were recurrence rate of sPTB due to PPRM at <37 weeks (following  
37  
38 sPTB due to PPRM in the index pregnancy), recurrence rate of sPTB due to PTL at <37 weeks  
39  
40 (following sPTB due to PTL in the index pregnancy), the recurrence of sPTB by gestational age,  
41  
42 and occurrence of iPTB at <37 weeks after a previous sPTB.  
43  
44  
45

46 For our analysis, we reported the pooled risk of recurrent preterm birth and  
47  
48 accompanying 95% confidence interval (CIs) for sPTB <37 weeks gestation, by iPTB, by  
49  
50 gestational age overall, and for PPRM and PTL. An a priori decision was made to use a  
51  
52 random-effects model for all models in anticipation of clinical heterogeneity between studies.  
53  
54 Forest plots were used to graphically represent the data. Heterogeneity between studies was  
55  
56  
57  
58  
59  
60



1  
2  
3 assessed using  $I^2$ , the Cochrane Q statistic, and accompanying p-values. All analysis was  
4  
5 conducted using Stata SE Version 14 (College Station, Texas).  
6  
7

## 8 9 **Results**

10 The search returned 11,079 articles, of which 104 met criteria for full-text review (Figure 1).

11  
12 Overall 31 articles met all of the inclusion criteria and were included in the review (14-44). A

13  
14 summary of all of the studies' data can be found in Appendix B. The included studies were

15  
16 almost entirely cohort studies, with only five randomized controlled trials (22, 26, 28, 35, 40).

17  
18 The sample sizes in the studies ranged from 33 to 17,334 women and the rate of recurrent sPTB

19  
20 at <37 weeks gestation ranged from 15.4% to 85.5%. Many of the studies had different

21  
22 definitions of sPTB and therefore they could not be combined for meta-analysis. The majority of

23  
24 the studies were of high quality (Appendix C), although cohort studies typically traded off

25  
26 between being generalizable to the broader patient population not seen in a tertiary center or

27  
28 having detailed clinical data available.  
29  
30  
31  
32  
33

34 The overall risk of recurrent sPTB at <37 weeks gestation (n=24 studies, 51,889 women)

35  
36 was 30.0% (95% CI: 27.0-34.0%) with a significant Q (P=0.00) and  $I^2$  of 98.7%, indicating

37  
38 between-study heterogeneity (Figure 2). The risk of iPTB at <37 weeks gestation after a

39  
40 previous spontaneous preterm birth (n=6 studies, 18,355 women) was 5.0% (95% CI: 3.0-7.0%)

41  
42 with an  $I^2$  of 98.0%.  
43  
44  
45

46 Few studies looked specifically at the recurrence of PPROM and PTL resulting in sPTB

47  
48 in singleton pregnancies following prior PPROM or PTL respectively. However, the identified

49  
50 risk of recurrent PPROM at <37 weeks gestation (n=4 studies, 3,138 women) was 7.0% (95%

51  
52 CI: 6.0-9.0%) with an  $I^2$  of 51.0% and the risk of recurrent PTL at <37 weeks gestation (n=3

53  
54 studies, 2,852 women) was 23.0% (95% CI: 13.0-33.0%) with an  $I^2$  of 97.3% (Figure 3).  
55  
56  
57  
58  
59  
60

## Discussion

This meta-analysis provides an overview of the overall risk of recurrent spontaneous preterm birth. We found that the absolute risk of recurrent sPTB at less than 37 weeks gestation in pregnancies was 30%. Interestingly, the risk of recurrent PTL was found to be 23%, similar to the overall risk of recurrent sPTB. Conversely, if a woman has a sPTB due to PPROM, she is less likely to have recurrent PPROM leading to sPTB, with a risk of only 7%. Thus the clinical pathway that leads to sPTB appears to influence the risk of recurrence.

In a 2014 systematic review by Kazemier et al., they found that the risk of recurrence of preterm birth is influenced by the singleton/twin order in both pregnancies. When they looked at spontaneous preterm singleton births after a previous singleton pregnancy, they found that the risk of recurrence of sPTB was 20.2% (45). In contrast to ours, their search strategy was exceedingly complex and included only cohort studies. Ultimately after abstract review they were left with only six studies that looked at singleton-singleton pregnancies, which could explain the difference in our recurrence risk. Further, our study is novel as we differentiated risk by clinical pathway leading to sPTB, whether PTL or PPROM. Ultimately, we found that while all sPTB tends to recur, the clinical pathway of the first sPTB is important in determining that recurrence risk. Previous studies tend to combine these underlying pathways together, but our results suggest that perhaps they should not be pooled. Some studies also suggest that children born following PPROM have increased mortality (46-48) and worse health outcomes (49) compared to children born after PTL, which further supports the premise that these should be looked at as separate clinical conditions.

However, new evidence suggests that PTB and the underlying pathologies that lead to PTB are not mutually exclusive, thus spontaneous and indicated PTB should perhaps not be

1  
2  
3 considered completely separate phenomena. Basso and Wilcox estimated that mortality due to  
4 immaturity itself was about 51%, whereas underlying pathologies that led to PTB accounted for  
5 approximately half of mortality (50). Similarly, in a recent study by Brown et al., the authors  
6 found that gestational age is on the causal path between biological determinants of preterm birth  
7 and neonatal outcomes (51). Infants who were exposed to both pathological intrauterine  
8 conditions and early delivery had increased risk for poor neonatal outcomes. As such a  
9 pathological intrauterine environment, for instance, one characterized by infection, placental  
10 ischemia and other biological determinants, acts through early delivery to produce poor  
11 outcomes. Ananth et al. found that women with a sPTB were not only likely to experience  
12 recurrent sPTB, but they were also associated with increased medically indicated PTB, and vice  
13 versa (7). Prevention of preterm mortality requires more than the resolution of PTB, but must  
14 also address the underlying etiologies.

15  
16  
17  
18  
19  
20  
21  
22  
23  
24  
25  
26  
27  
28  
29  
30  
31  
32  
33  
34  
35  
36  
37  
38  
39  
40  
41  
42  
43  
44  
45  
46  
47  
48  
49  
50  
51  
52  
53  
54  
55  
56  
57  
58  
59  
60

Strengths of our systematic review and meta-analysis include our broad search strategy with no language restrictions, which resulted in a large sample size of pooled data. Limitations include the fact that most of the studies were observational cohort studies and thus prone to bias, and there was significant between-study heterogeneity. While both small and large studies were identified and included, publication bias cannot be entirely ruled out. Although we were able to identify a large number of studies, many of them used different definitions for preterm birth and most did not identify the clinical pathway to PTB; as a consequence, these data could not be pooled and not all of the existing evidence could be summarized in this review.

In conclusion, our study reaffirmed that a previous spontaneous preterm birth is a significant risk factor for recurrence in subsequent pregnancies, placing that risk at 30%. However, substantial heterogeneity in underlying studies speaks to the need for common

1  
2  
3 definitions and further work in this area. Additionally, the absolute risk of recurrence appears to  
4  
5 be substantially higher if the underlying etiology is PTL as opposed to PPROM. Clinically, this  
6  
7 information will help with risk stratification and patient counseling. Interventions to prevent PTB  
8  
9 need to be focused and designed for specific clinical conditions. Further studies need to be done  
10  
11 that look at the efficacy of preventative treatments in the prevention of PTL and PPROM.  
12  
13

14  
15 Knowledge of the etiology of previous sPTB may help identify women at increased risk of sPTB  
16  
17 for participation in future clinical trials.  
18  
19  
20  
21  
22  
23  
24  
25  
26  
27  
28  
29  
30  
31  
32  
33  
34  
35  
36  
37  
38  
39  
40  
41  
42  
43  
44  
45  
46  
47  
48  
49  
50  
51  
52  
53  
54  
55  
56  
57  
58  
59  
60

## References

1. March of Dimes, PMNCH, Save the Children, WHO. The global action report on preterm birth. Geneva: World Health Organization, 2012.
2. Blencowe H, Cousens S, Oestergaard MZ, Chou D, Moller AB, Narwal R, et al. National, regional, and worldwide estimates of preterm birth rates in the year 2010 with time trends since 1990 for selected countries: a systematic analysis and implications. *Lancet*. 2012;379(9832):2162-72.
3. Lawn JE, Cousens S, Zupan J, Lancet Neonatal Survival Steering T. 4 million neonatal deaths: when? Where? Why? *Lancet*. 2005;365(9462):891-900.
4. Liu L, Johnson HL, Cousens S, Perin J, Scott S, Lawn JE, et al. Global, regional, and national causes of child mortality: an updated systematic analysis for 2010 with time trends since 2000. *Lancet*. 2012;379(9832):2151-61.
5. Goldenberg RL, Culhane JF, Iams JD, Romero R. Epidemiology and causes of preterm birth. *Lancet*. 2008;371(9606):75-84.
6. Mazaki-Tovi S, Romero R, Kusanovic JP, Erez O, Pineles BL, Gotsch F, et al. Recurrent preterm birth. *Semin Perinatol*. 2007;31(3):142-58.
7. Ananth CV, Vintzileos AM. Epidemiology of preterm birth and its clinical subtypes. *J Matern Fetal Neonatal Med*. 2006;19(12):773-82.
8. Lim G, Tracey J, Boom N, Karmakar S, Wang J, Berthelot JM, et al. CIHI survey: Hospital costs for preterm and small-for-gestational age babies in Canada. *Healthc Q*. 2009;12(4):20-4.
9. McDonald SW, Kingston D, Bayrampour H, Dolan SM, Tough SC. Cumulative psychosocial stress, coping resources, and preterm birth. *Arch Womens Ment Health*. 2014;17(6):559-68.
10. Shapiro GD, Fraser WD, Frasc MG, Seguin JR. Psychosocial stress in pregnancy and preterm birth: associations and mechanisms. *J Perinat Med*. 2013;41(6):631-45.
11. Loomans EM, van Dijk AE, Vrijkotte TG, van Eijsden M, Stronks K, Gemke RJ, et al. Psychosocial stress during pregnancy is related to adverse birth outcomes: results from a large multi-ethnic community-based birth cohort. *Eur J Public Health*. 2013;23(3):485-91.
12. Wells G, Shea B, O'Connell D, Peterson J, Welch V, Losos M, et al. The Newcastle-Ottawa Scale (NOS) for assessing the quality of nonrandomized studies in meta-analysis Ottawa: Ottawa Hospital Research Institute; 2014 [Available from: [http://www.ohri.ca/programs/clinical\\_epidemiology/oxford.asp](http://www.ohri.ca/programs/clinical_epidemiology/oxford.asp)].
13. Jadad AR, Moore RA, Carroll D, Jenkinson C, Reynolds DJ, Gavaghan DJ, et al. Assessing the quality of reports of randomized clinical trials: is blinding necessary? *Control Clin Trials*. 1996;17(1):1-12.
14. Ananth CV, Getahun D, Peltier MR, Salihu HM, Vintzileos AM. Recurrence of spontaneous versus medically indicated preterm birth. *Am J Obstet Gynecol*. 2006;195(3):643-50.
15. Asrat T, Lewis DF, Garite TJ, Major CA, Nageotte MP, Towers CV, et al. Rate of recurrence of preterm premature rupture of membranes in consecutive pregnancies. *Am J Obstet Gynecol*. 1991;165(4 Pt 1):1111-5.
16. Care AG, Sharp AN, Lane S, Roberts D, Watkins L, Alfirevic Z. Predicting preterm birth in women with previous preterm birth and cervical length  $\geq 25$  mm. *Ultrasound Obstet Gynecol*. 2014;43(6):681-6.

17. Carr-Hill RA, Hall MH. The repetition of spontaneous preterm labour. *Br J Obstet Gynaecol.* 1985;92(9):921-8.
18. Coleman S, Wallace L, Alexander J, Istwan N. Recurrent preterm birth in women treated with 17 alpha-hydroxyprogesterone caproate: the contribution of risk factors in the penultimate pregnancy. *J Matern Fetal Neonatal Med.* 2012;25(7):1034-8.
19. Crane JM, Hutchens D. Use of transvaginal ultrasonography to predict preterm birth in women with a history of preterm birth. *Ultrasound Obstet Gynecol.* 2008;32(5):640-5.
20. Drassinower D, Obican SG, Siddiq Z, Heller D, Gyamfi-Bannerman C, Friedman AM. Does the clinical presentation of a prior preterm birth predict risk in a subsequent pregnancy? *Am J Obstet Gynecol.* 2015;213(5):686 e1-7.
21. Ekwo E, Moawad A. The risk for recurrence of premature births to African-American and white women. *J Assoc Acad Minor Phys.* 1998;9(1):16-21.
22. Elimian A, Smith K, Williams M, Knudtson E, Goodman JR, Escobedo MB. A randomized controlled trial of intramuscular versus vaginal progesterone for the prevention of recurrent preterm birth. *Int J Gynaecol Obstet.* 2016;134(2):169-72.
23. Esplin MS, O'Brien E, Fraser A, Kerber RA, Clark E, Simonsen SE, et al. Estimating recurrence of spontaneous preterm delivery. *Obstet Gynecol.* 2008;112(3):516-23.
24. Getahun D, Strickland D, Ananth CV, Fassett MJ, Sacks DA, Kirby RS, et al. Recurrence of preterm premature rupture of membranes in relation to interval between pregnancies. *Am J Obstet Gynecol.* 2010;202(6):570 e1-6.
25. Glover MM, McKenna DS, Downing CM, Smith DB, Croom CS, Sonek JD. A randomized trial of micronized progesterone for the prevention of recurrent preterm birth. *Am J Perinatol.* 2011;28(5):377-81.
26. Goldenberg RL, Andrews WW, Faye-Petersen O, Cliver S, Goepfert AR, Hauth JC. The Alabama Preterm Birth Project: placental histology in recurrent spontaneous and indicated preterm birth. *Am J Obstet Gynecol.* 2006;195(3):792-6.
27. Gonzalez-Quintero VH, Cordova YC, Istwan NB, Tudela F, Rhea DJ, Romary LM, et al. Influence of gestational age and reason for prior preterm birth on rates of recurrent preterm delivery. *Am J Obstet Gynecol.* 2011;205(3):275 e1-5.
28. Harper M, Thom E, Klebanoff MA, Thorp J, Jr., Sorokin Y, Varner MW, et al. Omega-3 fatty acid supplementation to prevent recurrent preterm birth: a randomized controlled trial. *Obstet Gynecol.* 2010;115(2 Pt 1):234-42.
29. Himes KP, Simhan HN. Risk of recurrent preterm birth and placental pathology. *Obstet Gynecol.* 2008;112(1):121-6.
30. Hsieh TT, Chen SF, Shau WY, Hsieh CC, Hsu JJ, Hung TH. The impact of interpregnancy interval and previous preterm birth on the subsequent risk of preterm birth. *J Soc Gynecol Investig.* 2005;12(3):202-7.
31. Laughon SK, Albert PS, Leisher K, Mendola P. The NICHD Consecutive Pregnancies Study: recurrent preterm delivery by subtype. *Am J Obstet Gynecol.* 2014;210(2):131 e1-8.
32. Lykke JA, Paidas MJ, Langhoff-Roos J. Recurring complications in second pregnancy. *Obstet Gynecol.* 2009;113(6):1217-24.
33. Manuck TA, Henry E, Gibson J, Varner MW, Porter TF, Jackson GM, et al. Pregnancy outcomes in a recurrent preterm birth prevention clinic. *Am J Obstet Gynecol.* 2011;204(4):320 e1-6.
34. Markham KB, Walker H, Lynch CD, Iams JD. Preterm birth rates in a prematurity prevention clinic after adoption of progestin prophylaxis. *Obstet Gynecol.* 2014;123(1):34-9.

- 1  
2  
3 35. Meis PJ, Klebanoff M, Thom E, Dombrowski MP, Sibai B, Moawad AH, et al.  
4 Prevention of recurrent preterm delivery by 17 alpha-hydroxyprogesterone caproate. *N Engl J*  
5 *Med.* 2003;348(24):2379-85.
- 6  
7 36. Mercer BM, Goldenberg RL, Moawad AH, Meis PJ, Iams JD, Das AF, et al. The preterm  
8 prediction study: effect of gestational age and cause of preterm birth on subsequent obstetric  
9 outcome. National Institute of Child Health and Human Development Maternal-Fetal Medicine  
10 Units Network. *Am J Obstet Gynecol.* 1999;181(5 Pt 1):1216-21.
- 11 37. Owen J, Yost N, Berghella V, Thom E, Swain M, Dildy GA, 3rd, et al. Mid-trimester  
12 endovaginal sonography in women at high risk for spontaneous preterm birth. *JAMA.*  
13 2001;286(11):1340-8.
- 14 38. Rittenberg C, Newman RB, Istwan NB, Rhea DJ, Stanziano GJ. Preterm birth prevention  
15 by 17 alpha-hydroxyprogesterone caproate vs. daily nursing surveillance. *J Reprod Med.*  
16 2009;54(2):47-52.
- 17 39. Turitz AL, Bastek JA, Purisch SE, Elovitz MA, Levine LD. Patient characteristics  
18 associated with 17-alpha hydroxyprogesterone caproate use among a high-risk cohort. *Am J*  
19 *Obstet Gynecol.* 2016;214(4):536 e1-5.
- 20 40. Vermeulen GM, Bruinse HW. Prophylactic administration of clindamycin 2% vaginal  
21 cream to reduce the incidence of spontaneous preterm birth in women with an increased  
22 recurrence risk: a randomised placebo-controlled double-blind trial. *Br J Obstet Gynaecol.*  
23 1999;106(7):652-7.
- 24 41. Vogel I, Goepfert AR, Thorsen P, Skogstrand K, Hougaard DM, Curry AH, et al. Early  
25 second-trimester inflammatory markers and short cervical length and the risk of recurrent  
26 preterm birth. *J Reprod Immunol.* 2007;75(2):133-40.
- 27 42. Wallace JM, Bhattacharya S, Campbell DM, Horgan GW. Inter-Pregnancy Weight  
28 Change and the Risk of Recurrent Pregnancy Complications. *PLoS One.* 2016;11(5):e0154812.
- 29 43. Yamashita M, Hayashi S, Endo M, Okuno K, Fukui O, Mimura K, et al. Incidence and  
30 risk factors for recurrent spontaneous preterm birth: A retrospective cohort study in Japan. *J*  
31 *Obstet Gynaecol Res.* 2015;41(11):1708-14.
- 32 44. Yang J, Baer RJ, Berghella V, Chambers C, Chung P, Coker T, et al. Recurrence of  
33 Preterm Birth and Early Term Birth. *Obstet Gynecol.* 2016;128(2):364-72.
- 34 45. Kazemier BM, Buijs PE, Mignini L, Limpens J, de Groot CJ, Mol BW, et al. Impact of  
35 obstetric history on the risk of spontaneous preterm birth in singleton and multiple pregnancies: a  
36 systematic review. *BJOG.* 2014;121(10):1197-208; discussion 209.
- 37 46. Kamath-Rayne BD, DeFranco EA, Chung E, Chen A. Subtypes of preterm birth and the  
38 risk of postneonatal death. *J Pediatr.* 2013;162(1):28-34 e2.
- 39 47. Villar J, Abalos E, Carroli G, Giordano D, Wojdyla D, Piaggio G, et al. Heterogeneity of  
40 perinatal outcomes in the preterm delivery syndrome. *Obstet Gynecol.* 2004;104(1):78-87.
- 41 48. Chen A, Feresu SA, Barsoom MJ. Heterogeneity of preterm birth subtypes in relation to  
42 neonatal death. *Obstet Gynecol.* 2009;114(3):516-22.
- 43 49. Newman DE, Paamoni-Keren O, Press F, Wiznitzer A, Mazor M, Sheiner E. Neonatal  
44 outcome in preterm deliveries between 23 and 27 weeks' gestation with and without preterm  
45 premature rupture of membranes. *Arch Gynecol Obstet.* 2009;280(1):7-11.
- 46 50. Basso O, Wilcox A. Mortality risk among preterm babies: immaturity versus underlying  
47 pathology. *Epidemiology.* 2010;21(4):521-7.
- 48  
49  
50  
51  
52  
53  
54  
55  
56  
57  
58  
59  
60

1  
2  
3  
4  
5  
6  
7  
8  
9  
10  
11  
12  
13  
14  
15  
16  
17  
18  
19  
20  
21  
22  
23  
24  
25  
26  
27  
28  
29  
30  
31  
32  
33  
34  
35  
36  
37  
38  
39  
40  
41  
42  
43  
44  
45  
46  
47  
48  
49  
50  
51  
52  
53  
54  
55  
56  
57  
58  
59  
60

51. Brown HK, Speechley KN, Macnab J, Natale R, Campbell MK. Neonatal morbidity associated with late preterm and early term birth: the roles of gestational age and biological determinants of preterm birth. *Int J Epidemiol.* 2014;43(3):802-14.

For peer review only



1  
2  
3 Figure 1: Flow diagram of included studies  
4

5  
6 Figure 2. Forest plot of the rate of recurrent spontaneous preterm birth at <37 weeks gestation  
7

8 Figure 3. Forest plots of the rate of (a) recurrent spontaneous preterm birth (sPTB) due to  
9 preterm premature rupture of membranes (PPROM) following sPTB due to PPRM in the index  
10 pregnancy at <37 weeks gestation and (b) recurrent sPTB due to preterm labor (PTL) following  
11 sPTB due to PTL in the index pregnancy at <37 weeks gestation  
12  
13  
14  
15  
16  
17  
18  
19  
20  
21  
22  
23  
24  
25  
26  
27  
28  
29  
30  
31  
32  
33  
34  
35  
36  
37  
38  
39  
40  
41  
42  
43  
44  
45  
46  
47  
48  
49  
50  
51  
52  
53  
54  
55  
56  
57  
58  
59  
60

For peer review only

## Appendix A. Search Strategy

## Search Strategy:

1. Premature Birth
2. ((preterm or pre-term or premature or pre-mature) and (birth\* or childbirth\* or deliver\* or parturit\*))
3. Fetal Membranes, Premature Rupture
4. pprom
5. Obstetric Labor, Premature
6. ((preterm or pre-term or premature or pre-mature) and (labor or labour))
7. Recurrence
8. recur\* or repeat
9. (1 or 2 or 3 or 4 or 5 or 6) and (7 or 8)

Initial Search Run on June 17, 2015

Updated Search Run on July 29, 2016

## Appendix B. Included studies

| Author                           | Time Period | Country | Gestational Age at Spontaneous Preterm Birth (weeks) |             | Recurrence Rate      |
|----------------------------------|-------------|---------|------------------------------------------------------|-------------|----------------------|
|                                  |             |         | Pregnancy 1                                          | Pregnancy 2 |                      |
| Ananth 2006 (14)                 | 1989-1997   | USA     | <37                                                  | <37         | 2,626/12,670 (20.7%) |
|                                  |             |         |                                                      | <35         | 698/12,670 (5.5%)    |
|                                  |             |         |                                                      | <32         | 164/12,670 (1.3%)    |
|                                  |             |         | <35                                                  | <35         | 698/4,463 (15.6%)    |
|                                  |             |         | <32                                                  | <32         | 164/2,022 (8.1%)     |
| Asrat 1991 (15)                  |             | USA     | <36                                                  | <36         | 39/121 (32.2%)       |
| Care 2014 (16)                   | 2010-2012   | UK      | <34                                                  | <37         | 53/196 (27.0%)       |
|                                  |             |         |                                                      | <34         | 32/196 (16.3%)       |
| Carr-Hill 1985 (17)              | unspecified | UK      | <37                                                  | <37         | 76/494 (15.4%)       |
| Coleman 2012 (18)                | 2007-2010   | USA     | <37                                                  | <37         | 426/1,183 (36.0%)    |
|                                  |             |         |                                                      | <35         | 156/1,183 (13.2%)    |
|                                  |             |         |                                                      | <32         | 61/1,183 (5.2%)      |
| Crane 2008 (19)                  | 2000-2006   | Canada  | <37                                                  | <37         | 21/90 (23.3%)        |
|                                  |             |         |                                                      | <35         | 11/90 (12.2%)        |
|                                  |             |         |                                                      | <34         | 8/90 (8.9%)          |
| Drassinower 2015 (20)            | 2009-2014   | USA     | <37                                                  | <37         | 178/522 (34.1%)      |
|                                  |             |         |                                                      | <34         | 78/522 (14.9%)       |
|                                  |             |         |                                                      | <28         | 34/522 (6.5%)        |
| Ekwo 1998 (21)                   | 1988-1993   | USA     | <37                                                  | <37         | 56/108 (51.9%)       |
| Elimian 2016 (22)                | 2007-2010   | USA     | <37                                                  | <37         | 59/145 (40.7%)       |
|                                  |             |         |                                                      | <34         | 27/145 (18.6%)       |
|                                  |             |         |                                                      | <28         | 15/145 (10.3%)       |
| Esplin 2008 (23)                 | 1989-2001   | USA     | <37                                                  | <37         | 1663/6,199 (26.8%)   |
|                                  |             |         | <34                                                  | <37         | 587/1,669 (35.2%)    |
|                                  |             |         |                                                      | <34         | 299/1,669 (17.9%)    |
| Getahun 2010 (24)<br>*PPROM only | 1989-1997   | USA     | <37                                                  | <37         | 157/2,259 (6.9%)     |
|                                  |             |         | <34                                                  | <34         | 97/1,071 (9.1%)      |
|                                  |             |         | <32                                                  | <32         | 67/697 (9.6%)        |
|                                  |             |         | <28                                                  | <28         | 22/323 (6.8%)        |

| Author                      | Time Period | Country | Gestational Age at Spontaneous Preterm Birth (weeks) |             | Recurrence Rate     |
|-----------------------------|-------------|---------|------------------------------------------------------|-------------|---------------------|
|                             |             |         | Pregnancy 1                                          | Pregnancy 2 |                     |
|                             |             |         |                                                      |             |                     |
| Glover 2011 (25)            | 2006-2009   | USA     | <37                                                  | <37         | 13/33 (39.4%)       |
| Goldenberg 2006 (26)        | 1996-2001   | USA     | <32                                                  | <37         | 71/83 (85.5%)       |
| Gonzalez-Quintero 2011 (27) | 2006-2009   | USA     | <37                                                  | <37         | 597/2,123 (28.1%)   |
|                             |             |         |                                                      | <35         | 274/2,123 (12.9%)   |
|                             |             |         |                                                      | <32         | 113/2,123 (5.3%)    |
| Harper 2010 (28)            | 2005-2006   | USA     | <37                                                  | <37         | 292/852 (34.3%)     |
| Himes 2008 (29)             | 2001-2006   | USA     | <37                                                  | <37         | 102/245 (41.6%)     |
| Hsieh 2005 (30)             | 1991-1997   | Taiwan  | <37                                                  | <37         | 52/228 (22.8%)      |
| Laughon 2014 (31)           | 2002-2010   | USA     | <37                                                  | <37         | 921/3,139 (29.3%)   |
| Lykke 2009 (32)             | 1978-2007   | Denmark | <37                                                  | <37         | 2742/17,334 (15.8%) |
|                             |             |         |                                                      | <33         | 444/1,734 (25.6%)   |
|                             |             |         |                                                      | <28         | 139/535 (26.0%)     |
| Manuck 2011 (33)            | 2002-2010   | USA     | <35                                                  | <37         | 131/223 (58.7%)     |
|                             |             |         |                                                      | <32         | 25/223 (11.2%)      |
| Markham 2014 (34)           | 1998-2012   | USA     | <37                                                  | <37         | 459/1,066 (43.1%)   |
|                             |             |         |                                                      | <35         | 269/1,066 (25.2%)   |
|                             |             |         |                                                      | <32         | 139/1,066 (13.0%)   |
| Meis 2003 (35)              | 1999-2002   | USA     | <37                                                  | <37         | 159/463 (34.3%)     |
| Mercer 1999 (36)            | 1992-1994   | USA     | <37                                                  | <37         | 89/410 (21.7%)      |
|                             |             |         |                                                      | <35         | 55/410 (13.4%)      |
|                             |             |         |                                                      | <32         | 21/410 (5.1%)       |
|                             |             |         |                                                      | <30         | 12/410 (2.9%)       |
|                             |             |         |                                                      | <28         | 10/410 (2.4%)       |
| Owen 2001 (37)              | 1997-1999   | USA     | <32                                                  | <35         | 48/183 (26.2%)      |
|                             |             |         |                                                      | <32         | 35/183 (19.1%)      |
|                             |             |         |                                                      | <28         | 29/183 (15.8%)      |
|                             |             |         |                                                      | <24         | 20/183 (10.9%)      |
| Rittenberg 2009 (38)        | 1995-2005   | USA     | <37                                                  | <37         | 185/684 (27.0%)     |
|                             |             |         |                                                      | <35         | 78/684 (11.4%)      |
|                             |             |         |                                                      | <32         | 30/684 (4.4%)       |
| Turitz 2016 (39)            | 2009-2013   | USA     | <37                                                  | <37         | 80/218 (36.7%)      |

| Author              | Time Period | Country     | Gestational Age at Spontaneous Preterm Birth (weeks) |             | Recurrence Rate   |
|---------------------|-------------|-------------|------------------------------------------------------|-------------|-------------------|
|                     |             |             | Pregnancy 1                                          | Pregnancy 2 |                   |
| Vermeulen 1999 (40) | 1994-1996   | Netherlands | <37                                                  | <37         | 41/168 (24.4%)    |
|                     |             |             |                                                      | <34         | 14/168 (8.3%)     |
| Vogel 2007 (41)     | 2000-2001   | USA         | <30                                                  | <37         | 20/62 (32.3%)     |
|                     |             |             |                                                      | <35         | 15/62 (24.2%)     |
| Wallace 2016 (42)   | 1986-2013   | UK          | <37                                                  | <37         | 449/1,900 (23.6%) |
| Yamashita 2015 (43) | 2008-2012   | Japan       | <37                                                  | <37         | 89/547 (16.3%)    |
|                     |             |             |                                                      | <34         | 28/547 (5.1%)     |
|                     |             |             |                                                      | <28         | 10/547 (1.8%)     |
| Yang 2016 (44)      | 2005-2011   | USA         | <37                                                  | <37         | 588/1,068 (55.1%) |
|                     |             |             |                                                      | <32         | 71/1,068 (6.6%)   |
|                     |             |             |                                                      | <32         | 43/177 (24.3%)    |

1  
2  
3  
4  
5  
6  
7  
8  
9  
10  
11  
12  
13  
14  
15  
16  
17  
18  
19  
20  
21  
22  
23  
24  
25  
26  
27  
28  
29  
30  
31  
32  
33  
34  
35  
36  
37  
38  
39  
40  
41  
42  
43  
44  
45  
46  
47  
48  
49

Appendix C: Quality Assessment

| Author                | Representatives of the exposed cohort (0, 1) | Selection of the non-exposed cohort (0, 1) | Cohort Studies (Newcastle Ottawa Scale (12)) |                                                                                 |                                                                    | Assessment of outcome (0, 1) | Was follow-up long enough for outcomes to occur (0, 1) | Adequacy of follow-up of cohorts (0, 1) |
|-----------------------|----------------------------------------------|--------------------------------------------|----------------------------------------------|---------------------------------------------------------------------------------|--------------------------------------------------------------------|------------------------------|--------------------------------------------------------|-----------------------------------------|
|                       |                                              |                                            | Ascertainment of exposure (0, 1)             | Demonstration that outcome of interest was not present at start of study (0, 1) | Comparability of cohorts on the basis of design or analysis (0, 1) |                              |                                                        |                                         |
| Ananth 2006 (14)      | 1                                            | N/A                                        | 0                                            | 1                                                                               | N/A                                                                | 0                            | 1                                                      | 1                                       |
| Asrat 1991 (15)       | 0                                            | N/A                                        | 1                                            | 1                                                                               | N/A                                                                | 1                            | 1                                                      | 1                                       |
| Care 2014 (16)        | 0                                            | N/A                                        | 1                                            | 1                                                                               | N/A                                                                | 1                            | 1                                                      | 1                                       |
| Carr-Hill 1985 (17)   | 1                                            | N/A                                        | 0                                            | 1                                                                               | N/A                                                                | 0                            | 1                                                      | 1                                       |
| Coleman 2012 (18)     | 0                                            | N/A                                        | 1                                            | 1                                                                               | N/A                                                                | 1                            | 1                                                      | 1                                       |
| Crane 2008 (19)       | 0                                            | N/A                                        | 1                                            | 1                                                                               | N/A                                                                | 1                            | 1                                                      | 1                                       |
| Drassinower 2015 (20) | 0                                            | N/A                                        | 1                                            | 1                                                                               | N/A                                                                | 1                            | 1                                                      | 1                                       |
| Ekwo 1998 (21)        | 0                                            | N/A                                        | 1                                            | 1                                                                               | N/A                                                                | 1                            | 1                                                      | 1                                       |
| Esplin 2008 (23)      | 1                                            | N/A                                        | 0                                            | 1                                                                               | N/A                                                                | 0                            | 1                                                      | 1                                       |

| Author                           | Representatives of the exposed cohort (0, 1) | Selection of the non-exposed cohort (0, 1) | Cohort Studies (Newcastle Ottawa Scale (12)) |                                                                                 |                                                                    |                              |                                                        |                                         |
|----------------------------------|----------------------------------------------|--------------------------------------------|----------------------------------------------|---------------------------------------------------------------------------------|--------------------------------------------------------------------|------------------------------|--------------------------------------------------------|-----------------------------------------|
|                                  |                                              |                                            | Ascertainment of exposure (0, 1)             | Demonstration that outcome of interest was not present at start of study (0, 1) | Comparability of cohorts on the basis of design or analysis (0, 1) | Assessment of outcome (0, 1) | Was follow-up long enough for outcomes to occur (0, 1) | Adequacy of follow-up of cohorts (0, 1) |
| Getahun 2010 (24)<br>*PPROM only | 1                                            | N/A                                        | 0                                            | 1                                                                               | N/A                                                                | 0                            | 1                                                      | 1                                       |
| Goldenberg 2006 (26)             | 0                                            | N/A                                        | 1                                            | 1                                                                               | N/A                                                                | 1                            | 1                                                      | 1                                       |
| Gonzalez-Quintero 2011 (27)      | 0                                            | N/A                                        | 1                                            | 1                                                                               | N/A                                                                | 1                            | 1                                                      | 1                                       |
| Himes 2008 (29)                  | 0                                            | N/A                                        | 1                                            | 1                                                                               | N/A                                                                | 1                            | 1                                                      | 1                                       |
| Hsieh 2005 (30)                  | 0                                            | N/A                                        | 1                                            | 1                                                                               | N/A                                                                | 1                            | 1                                                      | 1                                       |
| Laughon 2014 (31)                | 1                                            | N/A                                        | 0                                            | 1                                                                               | N/A                                                                | 0                            | 1                                                      | 1                                       |
| Lykke 2009 (32)                  | 1                                            | N/A                                        | 0                                            | 1                                                                               | N/A                                                                | 0                            | 1                                                      | 1                                       |
| Manuck 2011 (33)                 | 0                                            | N/A                                        | 1                                            | 1                                                                               | N/A                                                                | 1                            | 1                                                      | 1                                       |
| Markham 2014 (34)                | 0                                            | N/A                                        | 1                                            | 1                                                                               | N/A                                                                | 1                            | 1                                                      | 1                                       |

1  
2  
3  
4  
5  
6  
7  
8  
9  
10  
11  
12  
13  
14  
15  
16  
17  
18  
19  
20  
21  
22  
23  
24  
25  
26  
27  
28  
29  
30  
31  
32  
33  
34  
35  
36  
37  
38  
39  
40  
41  
42  
43  
44  
45  
46  
47  
48  
49

| Author               | Representatives of the exposed cohort (0, 1) | Selection of the non-exposed cohort (0, 1) | Cohort Studies (Newcastle Ottawa Scale (12)) |                                                                                 |                                                                    |                              |                                                        |                                         |
|----------------------|----------------------------------------------|--------------------------------------------|----------------------------------------------|---------------------------------------------------------------------------------|--------------------------------------------------------------------|------------------------------|--------------------------------------------------------|-----------------------------------------|
|                      |                                              |                                            | Ascertainment of exposure (0, 1)             | Demonstration that outcome of interest was not present at start of study (0, 1) | Comparability of cohorts on the basis of design or analysis (0, 1) | Assessment of outcome (0, 1) | Was follow-up long enough for outcomes to occur (0, 1) | Adequacy of follow-up of cohorts (0, 1) |
| Mercer 1999 (36)     | 0                                            | N/A                                        | 1                                            | 1                                                                               | N/A                                                                | 1                            | 1                                                      | 1                                       |
| Owen 2001 (37)       | 0                                            | N/A                                        | 1                                            | 1                                                                               | N/A                                                                | 1                            | 1                                                      | 1                                       |
| Rittenberg 2009 (38) | 0                                            | N/A                                        | 1                                            | 1                                                                               | N/A                                                                | 1                            | 1                                                      | 1                                       |
| Turitz 2016 (39)     | 0                                            | N/A                                        | 1                                            | 1                                                                               | N/A                                                                | 1                            | 1                                                      | 1                                       |
| Vogel 2007 (41)      | 0                                            | N/A                                        | 1                                            | 1                                                                               | N/A                                                                | 1                            | 1                                                      | 1                                       |
| Wallace 2016 (42)    | 1                                            | N/A                                        | 0                                            | 1                                                                               | N/A                                                                | 0                            | 1                                                      | 1                                       |
| Yamashita 2015 (43)  | 0                                            | N/A                                        | 1                                            | 1                                                                               | N/A                                                                | 1                            | 1                                                      | 1                                       |
| Yang 2016 (44)       | 1                                            | N/A                                        | 0                                            | 1                                                                               | N/A                                                                | 0                            | 1                                                      | 1                                       |



| Randomized Controlled Trials (Jadad Scale (13)) |                         |                    |                                   |
|-------------------------------------------------|-------------------------|--------------------|-----------------------------------|
| Author                                          | Randomization (0, 1, 2) | Blinding (0, 1, 2) | An account of all patients (0, 1) |
| Elimian 2016 (22)                               | 2                       | 0                  | 0                                 |
| Glover 2011 (25)                                | 1                       | 2                  | 1                                 |
| Harper 2010 (28)                                | 2                       | 2                  | 1                                 |
| Meis 2003 (35)                                  | 2                       | 2                  | 1                                 |
| Vermeulen 1999 (40)                             | 2                       | 2                  | 0                                 |

1  
2  
3  
4  
5  
6  
7  
8  
9  
10  
11  
12  
13  
14  
15  
16  
17  
18  
19  
20  
21  
22  
23  
24  
25  
26  
27  
28  
29  
30  
31  
32  
33  
34  
35  
36  
37  
38  
39  
40  
41  
42  
43  
44  
45  
46  
47  
48  
49  
50  
51  
52  
53  
54  
55  
56  
57  
58  
59  
60

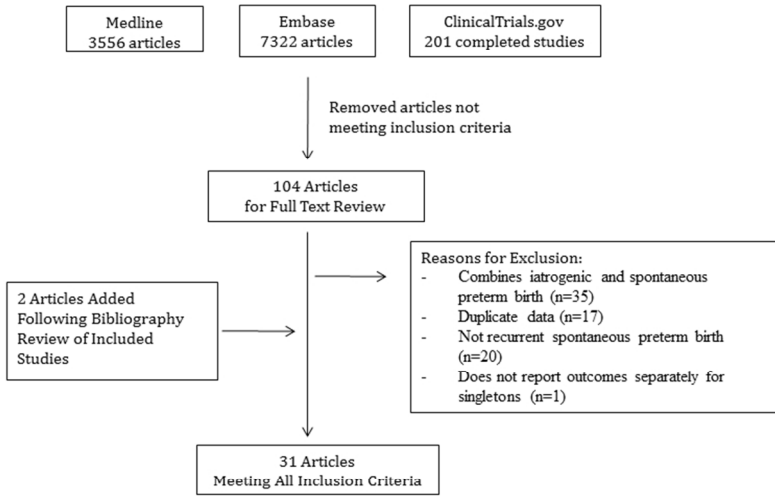

254x190mm (96 x 96 DPI)

ew only

1  
2  
3  
4  
5  
6  
7  
8  
9  
10  
11  
12  
13  
14  
15  
16  
17  
18  
19  
20  
21  
22  
23  
24  
25  
26  
27  
28  
29  
30  
31  
32  
33  
34  
35  
36  
37  
38  
39  
40  
41  
42  
43  
44  
45  
46  
47  
48  
49  
50  
51  
52  
53  
54  
55  
56  
57  
58  
59  
60

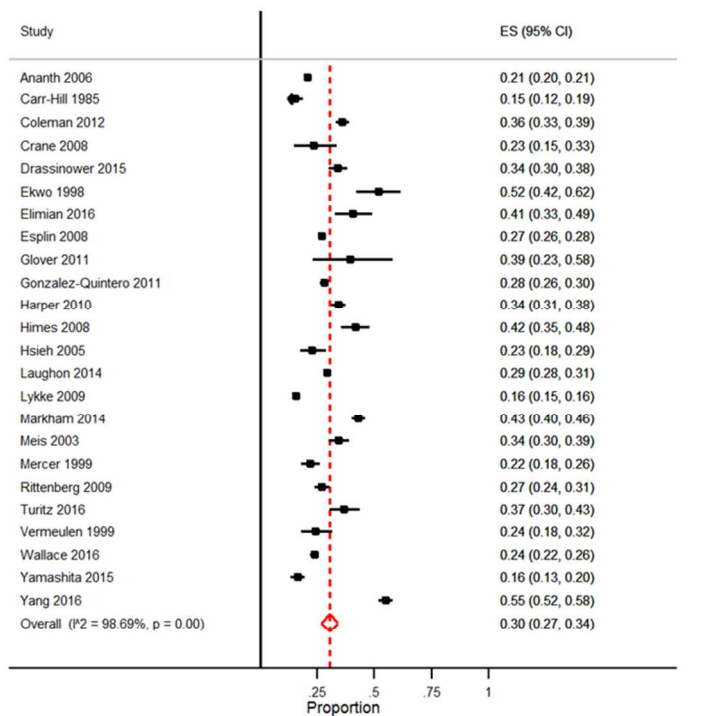

254x190mm (96 x 96 DPI)

ew only

1  
2  
3  
4  
5  
6  
7  
8  
9  
10  
11  
12  
13  
14  
15  
16  
17  
18  
19  
20  
21  
22  
23  
24  
25  
26  
27  
28  
29  
30  
31  
32  
33  
34  
35  
36  
37  
38  
39  
40  
41  
42  
43  
44  
45  
46  
47  
48  
49  
50  
51  
52  
53  
54  
55  
56  
57  
58  
59  
60

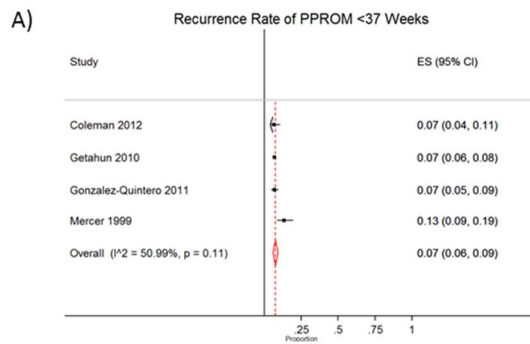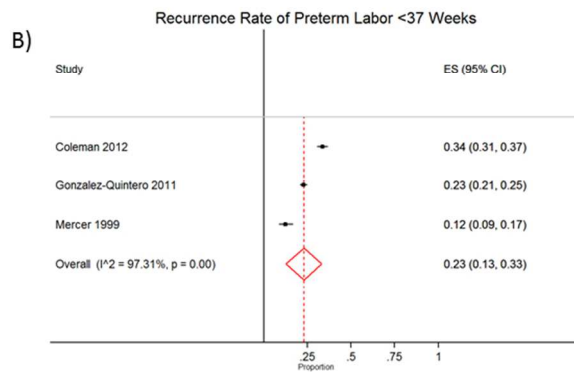

254x190mm (96 x 96 DPI)

ew only

# BMJ Open

## Risk of Recurrent Spontaneous Preterm Birth: A Systematic Review and Meta-Analysis

|                                 |                                                                                                                                                                                                   |
|---------------------------------|---------------------------------------------------------------------------------------------------------------------------------------------------------------------------------------------------|
| Journal:                        | <i>BMJ Open</i>                                                                                                                                                                                   |
| Manuscript ID                   | bmjopen-2016-015402.R1                                                                                                                                                                            |
| Article Type:                   | Research                                                                                                                                                                                          |
| Date Submitted by the Author:   | 30-Mar-2017                                                                                                                                                                                       |
| Complete List of Authors:       | Phillips, Courtney; University of Calgary<br>Velji, Zain; University of Calgary<br>Hanly, Ciara; University of British Columbia<br>Metcalf, Amy; University of Calgary, Obstetrics and Gynecology |
| <b>Primary Subject Heading</b>: | Obstetrics and gynaecology                                                                                                                                                                        |
| Secondary Subject Heading:      | Obstetrics and gynaecology, Epidemiology, Evidence based practice, Paediatrics                                                                                                                    |
| Keywords:                       | EPIDEMIOLOGY, NEONATOLOGY, OBSTETRICS, PAEDIATRICS                                                                                                                                                |
|                                 |                                                                                                                                                                                                   |

SCHOLARONE™  
Manuscripts

Peer Review Only

**Risk of Recurrent Spontaneous Preterm Birth: A Systematic Review and Meta-Analysis**

Ms. Courtney PHILLIPS<sup>1</sup> BSc, Ms. Zain VELJI<sup>2</sup> BSc, Ms. Ciara HANLY<sup>3</sup>, Dr. Amy METCALFE<sup>4,5</sup> PhD

<sup>1</sup>Cumming School of Medicine, University of Calgary, Calgary, Alberta, Canada

<sup>2</sup>Faculty of Nursing, University of Calgary, Calgary, Alberta, Canada

<sup>3</sup>School of Kinesiology, University of British Columbia, Vancouver, British Columbia, Canada

<sup>4</sup>Department of Obstetrics and Gynecology, University of Calgary, Calgary, Alberta, Canada

<sup>5</sup>Department of Community Health Sciences, University of Calgary, Calgary, Alberta, Canada

**Address for Correspondence:**

Amy Metcalfe

Foothills Medical Centre, 4<sup>th</sup> Floor North Tower

1403 29 St NW

Calgary, Alberta, Canada

T2N 2T9

Email: [amy.metcalfe@albertahealthservices.ca](mailto:amy.metcalfe@albertahealthservices.ca)

Phone: 403-944-8458

**Short Title:** Risk of Recurrent Spontaneous Preterm Birth

**Condensation:** The risk of recurrent spontaneous preterm birth is high, and tends to reoccur more frequently following preterm labor than preterm premature rupture of membranes.

**Conflict of Interest:** The authors have no conflicts of interest to report

**Contributorship Statement:** All authors made a substantial contribution to this study. CP, ZV and CH conducted the systematic review. CP drafted the manuscript. AM designed the study and conducted the meta-analysis. All authors critically reviewed the manuscript, interpreted the findings, and approved the final version. All authors had full access to all of the data in the study and can take responsibility for the integrity of the data and the accuracy of the data analysis. As the senior author AM affirms that the manuscript is an honest, accurate, and transparent account of the study being reported, that no important aspects of the study have been omitted, and that any discrepancies from the study as planned have been explained.

**Data Sharing Agreement:** No additional data is available

**Exclusive License:** The Corresponding Author has the right to grant on behalf of all authors and does grant on behalf of all authors, a worldwide license to the Publishers and its licensees in perpetuity, in all forms, formats and media (whether known now or created in the future), to i) publish, reproduce, distribute, display and store the Contribution, ii) translate the Contribution into other languages, create adaptations, reprints, include within collections and create summaries, extracts and/or, abstracts of the Contribution and convert or allow conversion into any format including without limitation audio, iii) create any other derivative work(s) based in whole or part on the on the Contribution, iv) to exploit all subsidiary rights to exploit all subsidiary rights that currently exist or as may exist in the future in the Contribution, v) the

1  
2  
3 inclusion of electronic links from the Contribution to third party material where-ever it may be  
4 located; and, vi) licence any third party to do any or all of the above.  
5  
6

7 **Funding:** This study was funded by the Alberta Children's Hospital Research Institute. Amy  
8 Metcalfe is supported by a New Investigator Award from the Canadian Institutes of Health  
9 Research. The funder had no role in study design, execution, or publication decisions.  
10

11 **Word Count (Abstract):** 236

12 **Word Count (Manuscript):** 2540

13 **Number of References:** 53

14 **Number of Tables:** 0

15 **Number of Figures:** 3

16 **Number of Appendices:** 3  
17  
18  
19  
20  
21  
22  
23  
24  
25  
26  
27  
28  
29  
30  
31  
32  
33  
34  
35  
36  
37  
38  
39  
40  
41  
42  
43  
44  
45  
46  
47  
48  
49  
50  
51  
52  
53  
54  
55  
56  
57  
58  
59  
60

**Abstract**

*Objective:* To determine the risk of recurrent spontaneous preterm birth following spontaneous preterm birth in singleton pregnancies.

*Design:* Systematic review and meta-analysis using random effects models.

*Data Sources:* An electronic literature search was conducted in OVID Medline (1948-2016), Embase (1980-2016), and ClinicalTrials.gov (completed studies effective 2016), supplemented by hand-searching bibliographies of included studies, to find all studies with original data concerning recurrent spontaneous preterm birth.

*Study Eligibility Criteria:* Studies had to include women with at least one spontaneous preterm singleton live birth (<37 weeks) and at least one subsequent pregnancy resulting in a singleton live birth. The Newcastle-Ottawa Scale and Jadad Scale were used to assess the study quality of cohort studies and randomized controlled trials respectively.

*Results:* Overall, 31 articles involving 55,016 women, met all inclusion criteria. Generally studies were well conducted and had a low risk of bias. The absolute risk of recurrent spontaneous preterm birth at <37 weeks gestation was 30.0% (95% CI: 27.0-34.0%). The risk of recurrence due to preterm premature rupture of membranes (PPROM) at <37 weeks gestation was 7.0% (95% CI: 6.0-9.0%), while the risk of recurrence due to preterm labor at <37 weeks gestation was 23.0% (95% CI: 13.0-33.0%).

*Conclusions:* The risk of recurrent spontaneous preterm birth is high and is influenced by the underlying clinical pathway leading to the birth. This information is important for clinicians when discussing the recurrence risk of spontaneous preterm birth with their patients.

**Key Words:** preterm birth, preterm labor, preterm premature rupture of membranes, recurrence, systematic review

**Article Summary – Strengths and Limitations of This Study:**



- 1  
2  
3  
4  
5  
6  
7  
8  
9  
10  
11  
12  
13  
14  
15  
16  
17  
18  
19  
20  
21  
22  
23  
24  
25  
26  
27  
28  
29  
30  
31  
32  
33  
34  
35  
36  
37  
38  
39  
40  
41  
42  
43  
44  
45  
46  
47  
48  
49  
50  
51  
52  
53  
54  
55  
56  
57  
58  
59  
60
- Study strengths include the comprehensive search strategy with no language restrictions used in the nature of the systematic review.
  - Limitations primarily relate to the underlying data that was available on this topic. Most of the included studies were observational in nature. Additionally, many primary studies examining the recurrence risk of preterm birth had to be excluded as they did not clearly differentiate between spontaneous and indicated preterm delivery. There was a high degree of heterogeneity in the studies included in the meta-analysis.

## Introduction

Preterm birth (PTB) is defined as any live birth occurring before 37 completed weeks of gestation; this can be subdivided into extremely preterm (<28 weeks), very preterm (28-<32 weeks), moderately preterm (32-<34 weeks) and late preterm (34-<37 weeks) birth based on the gestational age at delivery (1). This sub-categorization is important as gestational age is inversely associated with increased mortality, morbidity and the intensity of neonatal care required at birth (2). Worldwide, 11.1% of infants are born preterm every year (2). Preterm birth is the leading cause of perinatal morbidity and mortality, and second most common cause of death, after pneumonia, in children under five years of age (3, 4).

Indicated preterm births (iPTB) are those induced for medical reasons, such as pre-eclampsia, intrauterine growth restriction or fetal distress. However, approximately 70% of PTB occur spontaneously (sPTB) (5). The clinical pathways that lead to sPTB typically include preterm labor (PTL) and preterm premature rupture of membranes (PPROM), although these occur on a spectrum and may co-occur in the same clinical setting. PTL is defined as regular contractions and cervical changes at less than 37 weeks gestation, and PPRM is defined as spontaneous rupture of membranes at least one hour before contractions at less than 37 weeks gestation (5). Known risk factors for spontaneous preterm birth include a previous preterm birth, black race, low maternal body-mass index, comorbidities, a short cervical length and a raised fetal fibronectin concentration (5, 6). Despite knowing these risk factors, our understanding of the etiology behind sPTB is poor and sPTB is considered to be multifactorial in nature (6, 7).

Although sPTB has a tendency to recur, little is known about the recurrence risk (7). This is of concern because sPTB is a leading cause of neonatal morbidity and mortality, and it also has a large economic burden (8). Further, women who have had a previous sPTB are likely to be anxious during their subsequent pregnancies, which itself can lead to sPTB and other adverse

1  
2  
3 pregnancy outcomes (9-11). Therefore, we conducted a systematic review and meta-analysis to  
4  
5 investigate the absolute risk of recurrent sPTB following sPTB in singleton pregnancies. By  
6  
7 better understanding the recurrence risk of sPTB, healthcare workers may be better equipped to  
8  
9 manage patient needs and anxieties, as well as develop and apply preventative treatments.  
10  
11

## 12 13 14 **Methods**

15 Two study authors (ZV and CH) executed a comprehensive literature search of Medline (from  
16  
17 1946 to 2015) and Embase (from 1980 to 2015) to identify publications that contained key terms  
18  
19 related to recurrent sPTB in June 2015. The search was updated in July 2016, and expanded to  
20  
21 included completed studies identified through ClinicalTrials.gov. PPRM, PTL and related  
22  
23 terms were included in the search. For the full search strategy, please refer to Appendix A. Titles  
24  
25 and abstracts of these articles were screened for relevance to determine which articles were to  
26  
27 undergo full-text review. Two independent reviewers (ZV and CP) assessed the final eligibility  
28  
29 of the full-text reviewed articles. We resolved disagreements in full-text eligibility or data  
30  
31 abstraction by involvement of a third party (AM). The bibliographies of included studies were  
32  
33 reviewed to identify additional publications not found through the database search. A complete  
34  
35 summary of the search strategy can be found in Figure 1. No patients were directly involved in  
36  
37 this study. As this study only used published data, it was exempt from Institutional Review  
38  
39 Board approval.  
40  
41  
42  
43  
44  
45

46 All studies with original data concerning recurrent sPTB and  $N \geq 20$  were considered for  
47  
48 inclusion. No language restrictions were used. Conference abstracts were not considered. To be  
49  
50 included, studies had to include women with at least one spontaneous preterm live birth (delivery  
51  
52  $< 37$  weeks of gestation) in their obstetric history and at least one subsequent pregnancy resulting  
53  
54 in a live birth. Only studies looking at singleton pregnancies were included. Animal studies,  
55  
56  
57  
58  
59  
60

1  
2  
3 studies that only included iPTB, studies that combined iPTB and sPTB, and studies on PPRM  
4 or PTL where it was not clear if it resulted in sPTB were excluded. In the case of duplicate data,  
5  
6 the study with the largest sample size was included.  
7  
8

9  
10 The data extraction was completed independently by ZV and CP using a standardized  
11 data extraction form. Data was reviewed by AM prior to analysis to ensure completeness.  
12  
13 Information on the authors, title, publication year, data year, location of study, study design,  
14 definitions of preterm birth, and inclusion and exclusion criteria were all extracted. In addition,  
15 information was extracted on the number of women with spontaneous preterm birth in their  
16 initial pregnancy, whether due to PPRM or PTL, number of women with term births in  
17 subsequent pregnancies, and number of women with preterm births in subsequent pregnancies,  
18 whether due to PPRM, PTL or indicated causes. For studies that reported on total reproductive  
19 history, only data on the first 2 consecutive pregnancies were extracted. The Newcastle-Ottawa  
20 Scale (12) and the Jadad Scale (13) were used to assess study quality of cohort studies and  
21 randomized controlled trials respectively.  
22  
23  
24  
25  
26  
27  
28  
29  
30  
31  
32  
33  
34  
35

36 The primary outcome measured was the recurrence rate of sPTB at <37 weeks gestation.  
37  
38 Secondary outcomes were recurrence rate of sPTB due to PPRM at <37 weeks (following  
39 sPTB due to PPRM in the index pregnancy), recurrence rate of sPTB due to PTL at <37 weeks  
40 (following sPTB due to PTL in the index pregnancy), the recurrence of sPTB by gestational age,  
41 and occurrence of iPTB at <37 weeks after a previous sPTB.  
42  
43  
44  
45  
46  
47

48 For our analysis, we reported the pooled risk of recurrent preterm birth and  
49 accompanying 95% confidence interval (CIs) for sPTB <37 weeks gestation, by iPTB, by  
50 gestational age overall, and for PPRM and PTL. Stratified analysis was used to examine the  
51 recurrence rate of sPTB <37 weeks gestation by study design and quality. An a priori decision  
52  
53  
54  
55  
56  
57  
58  
59  
60

1  
2  
3 was made to use a random-effects model for all models in anticipation of clinical heterogeneity  
4 between studies. Forest plots were used to graphically represent the data. Heterogeneity between  
5 studies was assessed using  $I^2$ , the Cochran Q statistic, and accompanying p-values. All analysis  
6 was conducted using Stata SE Version 14 (College Station, Texas).  
7  
8  
9  
10  
11

## 12 13 14 **Results**

15 The search returned 11,079 articles, of which 104 met criteria for full-text review (Figure 1).  
16

17 Overall 31 articles met all of the inclusion criteria and were included in the review (14-44). A  
18 summary of all of the studies' data can be found in Appendix B (recurrence risk of sPTB is  
19 located in Table B1 and occurrence risk of iPTB following sPTB is located in Table B2). The  
20 included studies were almost entirely cohort studies, with only five randomized controlled trials  
21 (22, 26, 28, 35, 40). The sample sizes in the studies ranged from 33 to 17,334 women and the  
22 rate of recurrent sPTB at <37 weeks gestation ranged from 15.4% to 85.5%. Many of the studies  
23 had different definitions of sPTB and therefore they could not be combined for meta-analysis.  
24  
25 There was only a sufficient number of studies that defined preterm birth as occurring prior to 37  
26 weeks in both the index and subsequent pregnancy to create pooled estimates.  
27  
28  
29  
30  
31  
32  
33  
34  
35  
36  
37

38 The overall risk of recurrent sPTB at <37 weeks gestation (n=24 studies, 51,889 women)  
39 was 30.0% (95% CI: 27.0-34.0%) with a significant Q (P=0.00) and  $I^2$  of 98.7%, indicating  
40 between-study heterogeneity (Figure 2). The recurrence rate did not significantly differ between  
41 randomized controlled trials (34.0%, 95% CI: 29.0-38.0%; n=5 studies, 1,661 women) and  
42 cohort studies (30.0%, 95% CI: 26.0-34.0%, n=19 studies, 50,228 women). The risk of iPTB at  
43 <37 weeks gestation after a previous spontaneous preterm birth (n=6 studies, 18,355 women)  
44 was 5.0% (95% CI: 3.0-7.0%) with an  $I^2$  of 98.0%.  
45  
46  
47  
48  
49  
50  
51  
52  
53  
54  
55  
56  
57  
58  
59  
60

1  
2  
3 Few studies looked specifically at the recurrence of PPRM and PTL resulting in sPTB  
4 in singleton pregnancies following prior PPRM or PTL respectively. However, the identified  
5 risk of recurrent PPRM at <37 weeks gestation (n=4 studies, 3,138 women) was 7.0% (95%  
6 CI: 6.0-9.0%) with an I<sup>2</sup> of 51.0% and the risk of recurrent PTL at <37 weeks gestation (n=3  
7 studies, 2,852 women) was 23.0% (95% CI: 13.0-33.0%) with an I<sup>2</sup> of 97.3% (Figure 3).  
8  
9

10  
11 The majority of the studies were of high quality (Appendix C – cohort studies are located  
12 in Table C1 and randomized controlled trials in Table C2). As this study exclusively examined  
13 the recurrence risk of spontaneous preterm birth, two elements of the Newcastle Ottawa Scale  
14 relating to the selection of the unexposed cohort and the comparability of the exposed and  
15 unexposed cohorts were unable to be assessed. Cohort studies typically traded off between being  
16 generalizable to the broader patient population not seen in a tertiary center or having detailed  
17 clinical data available. All cohort studies had a quality score of 4 or 5 out of a possible 6 points.  
18 No statistically significant differences in the recurrence rate of sPTB prior to 37 weeks was  
19 observed based on quality score in cohort studies (Score 4: 27.0%, 95% CI: 21.0-32.0%; Score 5:  
20 32.0%, 95% CI: 26.0-37.0%). All but one randomized controlled trial was deemed to be high  
21 quality (Jahad score  $\geq 4/5$ ) (22). This low-quality trial did report a higher recurrence risk (41.0%,  
22 95% CI: 33.0-49.0) than the pooled estimated generated from high quality trials (32.0%, 95% CI:  
23 28.0-37.0); however, as evidenced by the overlapping confidence intervals, these estimates are  
24 not statistically different.  
25  
26  
27  
28  
29  
30  
31  
32  
33  
34  
35  
36  
37  
38  
39  
40  
41  
42  
43  
44  
45  
46  
47  
48  
49  
50  
51

## 52 Discussion

53 This meta-analysis provides an overview of the overall risk of recurrent spontaneous preterm  
54 birth. We found that the absolute risk of recurrent sPTB at less than 37 weeks gestation in  
55  
56  
57  
58  
59  
60

1  
2  
3 pregnancies was 30%; this estimate was consistent across study designs and study quality.  
4  
5 Interestingly, the risk of recurrent PTL was found to be 23%, similar to the overall risk of  
6  
7 recurrent sPTB. Conversely, if a woman has a sPTB due to PPROM, she is less likely to have  
8  
9 recurrent PPROM leading to sPTB, with a risk of only 7%. Thus the clinical pathway that leads  
10  
11 to sPTB appears to influence the risk of recurrence.  
12  
13

14  
15 In a 2014 systematic review by Kazemier et al., they found that the risk of recurrence of  
16  
17 preterm birth is influenced by the singleton/twin order in both pregnancies. When they looked at  
18  
19 spontaneous preterm singleton births after a previous singleton pregnancy, they found that the  
20  
21 risk of recurrence of sPTB was 20.2% (45). In contrast to ours, their search strategy was  
22  
23 exceedingly complex and included only cohort studies. Ultimately after abstract review they  
24  
25 were left with only six studies that looked at singleton-singleton pregnancies, which could  
26  
27 explain the difference in our recurrence risk. Further, our study is novel as we differentiated risk  
28  
29 by clinical pathway leading to sPTB, whether PTL or PPROM. Ultimately, we found that while  
30  
31 all sPTB tends to recur, the clinical pathway of the first sPTB is important in determining that  
32  
33 recurrence risk. Previous studies tend to combine these underlying pathways together, but our  
34  
35 results suggest that perhaps they should not be pooled. Some studies also suggest that children  
36  
37 born following PPROM have increased mortality (46-48) and worse health outcomes (49)  
38  
39 compared to children born after PTL, which further supports the premise that these should be  
40  
41 looked at as separate clinical conditions.  
42  
43  
44  
45  
46  
47

48  
49 However, new evidence suggests that PTB and the underlying pathologies that lead to  
50  
51 PTB are not mutually exclusive, thus spontaneous and indicated PTB should perhaps not be  
52  
53 considered completely separate phenomena. Basso and Wilcox estimated that mortality due to  
54  
55 immaturity itself was about 51%, whereas underlying pathologies that led to PTB accounted for  
56  
57  
58  
59  
60

1  
2  
3 approximately half of mortality (50). Similarly, in a recent study by Brown et al., the authors  
4  
5 found that gestational age is on the causal path between biological determinants of preterm birth  
6  
7 and neonatal outcomes (51). Infants who were exposed to both pathological intrauterine  
8  
9 conditions and early delivery had increased risk for poor neonatal outcomes. As such a  
10  
11 pathological intrauterine environment, for instance, one characterized by infection, placental  
12  
13 ischemia and other biological determinants, acts through early delivery to produce poor  
14  
15 outcomes. Ananth et al. found that women with a sPTB were not only likely to experience  
16  
17 recurrent sPTB, but they were also associated with increased medically indicated PTB, and vice  
18  
19 versa (7). Prevention of preterm mortality requires more than the resolution of PTB, but must  
20  
21 also address the underlying etiologies.  
22  
23  
24  
25  
26

27 Strengths of our systematic review and meta-analysis include our broad search strategy  
28  
29 with no language restrictions, which resulted in a large sample size of pooled data. Limitations  
30  
31 include the fact that most of the studies were observational cohort studies and thus prone to bias,  
32  
33 and there was significant between-study heterogeneity. This is important as many women  
34  
35 included in this body of literature would have been offered some form of therapy to reduce their  
36  
37 risks of recurrent preterm birth. Strategies to prevent preterm birth are varied and evidence of  
38  
39 their effectiveness are mixed (52). Effective strategies to prevent preterm birth can be  
40  
41 implemented at the individual level (i.e. progesterone supplementation, cervical cerclage,  
42  
43 smoking cessation), the clinic/hospital level (i.e. hard-stop policies to prevent non-medically  
44  
45 indicated late preterm and early term birth, preterm birth prevention clinics) and the societal  
46  
47 level (i.e. smoke-free legislation to reduce environmental tobacco smoke, legislation regarding  
48  
49 single-embryo transfer during in vitro fertilization) (52). As documentation of specific treatment  
50  
51 strategies was not consistently reported in this body of literature, we were not able to synthesize  
52  
53  
54  
55  
56  
57  
58  
59  
60



1  
2  
3 these results according to specific types of treatment. While both small and large studies were  
4 identified and included, publication bias cannot be entirely ruled out. While the decision to only  
5 include studies with a minimum sample size of 20 was used to exclude case studies of rare cases  
6 that may not be generalizable, this may have inadvertently resulted in the exclusion of some  
7 small case series. Additionally, we only searched 3 independent sources and reviewed the  
8 bibliographies of included articles, thus articles in journals that were not indexed in either  
9 Medline or Embase or studies that were not registered on clinicaltrials.gov or were not cited by  
10 articles that were ultimately included in this review would not have been identified. We  
11 anticipate that the impact of this would be minimal as a study examining the effectiveness of  
12 different databases to identify studies related to maternal morbidity and mortality concluded that  
13 Medline and Embase has the highest yield in identifying unique studies, and that over 60% of all  
14 studies were identified by multiple sources (53). Although we were able to identify a large  
15 number of studies, many of them used different definitions for preterm birth and most did not  
16 identify the clinical pathway to PTB; as a consequence, these data could not be pooled and not  
17 all of the existing evidence could be summarized in this review.

18  
19  
20  
21  
22  
23  
24  
25  
26  
27  
28  
29  
30  
31  
32  
33  
34  
35  
36  
37  
38  
39 In conclusion, our study reaffirmed that a previous spontaneous preterm birth is a  
40 significant risk factor for recurrence in subsequent pregnancies, placing that risk at 30%.  
41  
42  
43 However, substantial heterogeneity in underlying studies speaks to the need for common  
44 definitions and further work in this area. Additionally, the absolute risk of recurrence appears to  
45 be substantially higher if the underlying etiology is PTL as opposed to PPRM. Clinically, this  
46 information will help with risk stratification and patient counseling. Interventions to prevent PTB  
47 need to be focused and designed for specific clinical conditions. Further studies need to be done  
48 that look at the efficacy of preventative treatments in the prevention of PTL and PPRM.  
49  
50  
51  
52  
53  
54  
55  
56  
57  
58  
59  
60

1  
2  
3  
4  
5  
6  
7  
8  
9  
10  
11  
12  
13  
14  
15  
16  
17  
18  
19  
20  
21  
22  
23  
24  
25  
26  
27  
28  
29  
30  
31  
32  
33  
34  
35  
36  
37  
38  
39  
40  
41  
42  
43  
44  
45  
46  
47  
48  
49  
50  
51  
52  
53  
54  
55  
56  
57  
58  
59  
60

Knowledge of the etiology of previous sPTB may help identify women at increased risk of sPTB for participation in future clinical trials.

For peer review only

## References

1. March of Dimes, PMNCH, Save the Children, WHO. The global action report on preterm birth. Geneva: World Health Organization, 2012.
2. Blencowe H, Cousens S, Oestergaard MZ, Chou D, Moller AB, Narwal R, et al. National, regional, and worldwide estimates of preterm birth rates in the year 2010 with time trends since 1990 for selected countries: a systematic analysis and implications. *Lancet*. 2012;379(9832):2162-72.
3. Lawn JE, Cousens S, Zupan J, Lancet Neonatal Survival Steering T. 4 million neonatal deaths: when? Where? Why? *Lancet*. 2005;365(9462):891-900.
4. Liu L, Johnson HL, Cousens S, Perin J, Scott S, Lawn JE, et al. Global, regional, and national causes of child mortality: an updated systematic analysis for 2010 with time trends since 2000. *Lancet*. 2012;379(9832):2151-61.
5. Goldenberg RL, Culhane JF, Iams JD, Romero R. Epidemiology and causes of preterm birth. *Lancet*. 2008;371(9606):75-84.
6. Mazaki-Tovi S, Romero R, Kusanovic JP, Erez O, Pineles BL, Gotsch F, et al. Recurrent preterm birth. *Semin Perinatol*. 2007;31(3):142-58.
7. Ananth CV, Vintzileos AM. Epidemiology of preterm birth and its clinical subtypes. *J Matern Fetal Neonatal Med*. 2006;19(12):773-82.
8. Lim G, Tracey J, Boom N, Karmakar S, Wang J, Berthelot JM, et al. CIHI survey: Hospital costs for preterm and small-for-gestational age babies in Canada. *Healthc Q*. 2009;12(4):20-4.
9. McDonald SW, Kingston D, Bayrampour H, Dolan SM, Tough SC. Cumulative psychosocial stress, coping resources, and preterm birth. *Arch Womens Ment Health*. 2014;17(6):559-68.
10. Shapiro GD, Fraser WD, Frascch MG, Seguin JR. Psychosocial stress in pregnancy and preterm birth: associations and mechanisms. *J Perinat Med*. 2013;41(6):631-45.
11. Loomans EM, van Dijk AE, Vrijkotte TG, van Eijsden M, Stronks K, Gemke RJ, et al. Psychosocial stress during pregnancy is related to adverse birth outcomes: results from a large multi-ethnic community-based birth cohort. *Eur J Public Health*. 2013;23(3):485-91.
12. Wells G, Shea B, O'Connell D, Peterson J, Welch V, Losos M, et al. The Newcastle-Ottawa Scale (NOS) for assessing the quality of nonrandomized studies in meta-analysis Ottawa: Ottawa Hospital Research Institute; 2014 [Available from: [http://www.ohri.ca/programs/clinical\\_epidemiology/oxford.asp](http://www.ohri.ca/programs/clinical_epidemiology/oxford.asp)].
13. Jadad AR, Moore RA, Carroll D, Jenkinson C, Reynolds DJ, Gavaghan DJ, et al. Assessing the quality of reports of randomized clinical trials: is blinding necessary? *Control Clin Trials*. 1996;17(1):1-12.
14. Ananth CV, Getahun D, Peltier MR, Salihu HM, Vintzileos AM. Recurrence of spontaneous versus medically indicated preterm birth. *Am J Obstet Gynecol*. 2006;195(3):643-50.
15. Asrat T, Lewis DF, Garite TJ, Major CA, Nageotte MP, Towers CV, et al. Rate of recurrence of preterm premature rupture of membranes in consecutive pregnancies. *Am J Obstet Gynecol*. 1991;165(4 Pt 1):1111-5.
16. Care AG, Sharp AN, Lane S, Roberts D, Watkins L, Alfirevic Z. Predicting preterm birth in women with previous preterm birth and cervical length  $\geq 25$  mm. *Ultrasound Obstet Gynecol*. 2014;43(6):681-6.

17. Carr-Hill RA, Hall MH. The repetition of spontaneous preterm labour. *Br J Obstet Gynaecol.* 1985;92(9):921-8.
18. Coleman S, Wallace L, Alexander J, Istwan N. Recurrent preterm birth in women treated with 17 alpha-hydroxyprogesterone caproate: the contribution of risk factors in the penultimate pregnancy. *J Matern Fetal Neonatal Med.* 2012;25(7):1034-8.
19. Crane JM, Hutchens D. Use of transvaginal ultrasonography to predict preterm birth in women with a history of preterm birth. *Ultrasound Obstet Gynecol.* 2008;32(5):640-5.
20. Drassinower D, Obican SG, Siddiq Z, Heller D, Gyamfi-Bannerman C, Friedman AM. Does the clinical presentation of a prior preterm birth predict risk in a subsequent pregnancy? *Am J Obstet Gynecol.* 2015;213(5):686 e1-7.
21. Ekwo E, Moawad A. The risk for recurrence of premature births to African-American and white women. *J Assoc Acad Minor Phys.* 1998;9(1):16-21.
22. Elimian A, Smith K, Williams M, Knudtson E, Goodman JR, Escobedo MB. A randomized controlled trial of intramuscular versus vaginal progesterone for the prevention of recurrent preterm birth. *Int J Gynaecol Obstet.* 2016;134(2):169-72.
23. Esplin MS, O'Brien E, Fraser A, Kerber RA, Clark E, Simonsen SE, et al. Estimating recurrence of spontaneous preterm delivery. *Obstet Gynecol.* 2008;112(3):516-23.
24. Getahun D, Strickland D, Ananth CV, Fassett MJ, Sacks DA, Kirby RS, et al. Recurrence of preterm premature rupture of membranes in relation to interval between pregnancies. *Am J Obstet Gynecol.* 2010;202(6):570 e1-6.
25. Glover MM, McKenna DS, Downing CM, Smith DB, Croom CS, Sonek JD. A randomized trial of micronized progesterone for the prevention of recurrent preterm birth. *Am J Perinatol.* 2011;28(5):377-81.
26. Goldenberg RL, Andrews WW, Faye-Petersen O, Cliver S, Goepfert AR, Hauth JC. The Alabama Preterm Birth Project: placental histology in recurrent spontaneous and indicated preterm birth. *Am J Obstet Gynecol.* 2006;195(3):792-6.
27. Gonzalez-Quintero VH, Cordova YC, Istwan NB, Tudela F, Rhea DJ, Romary LM, et al. Influence of gestational age and reason for prior preterm birth on rates of recurrent preterm delivery. *Am J Obstet Gynecol.* 2011;205(3):275 e1-5.
28. Harper M, Thom E, Klebanoff MA, Thorp J, Jr., Sorokin Y, Varner MW, et al. Omega-3 fatty acid supplementation to prevent recurrent preterm birth: a randomized controlled trial. *Obstet Gynecol.* 2010;115(2 Pt 1):234-42.
29. Himes KP, Simhan HN. Risk of recurrent preterm birth and placental pathology. *Obstet Gynecol.* 2008;112(1):121-6.
30. Hsieh TT, Chen SF, Shau WY, Hsieh CC, Hsu JJ, Hung TH. The impact of interpregnancy interval and previous preterm birth on the subsequent risk of preterm birth. *J Soc Gynecol Investig.* 2005;12(3):202-7.
31. Laughon SK, Albert PS, Leisher K, Mendola P. The NICHD Consecutive Pregnancies Study: recurrent preterm delivery by subtype. *Am J Obstet Gynecol.* 2014;210(2):131 e1-8.
32. Lykke JA, Paidas MJ, Langhoff-Roos J. Recurring complications in second pregnancy. *Obstet Gynecol.* 2009;113(6):1217-24.
33. Manuck TA, Henry E, Gibson J, Varner MW, Porter TF, Jackson GM, et al. Pregnancy outcomes in a recurrent preterm birth prevention clinic. *Am J Obstet Gynecol.* 2011;204(4):320 e1-6.
34. Markham KB, Walker H, Lynch CD, Iams JD. Preterm birth rates in a prematurity prevention clinic after adoption of progestin prophylaxis. *Obstet Gynecol.* 2014;123(1):34-9.

- 1  
2  
3 35. Meis PJ, Klebanoff M, Thom E, Dombrowski MP, Sibai B, Moawad AH, et al.  
4 Prevention of recurrent preterm delivery by 17 alpha-hydroxyprogesterone caproate. *N Engl J*  
5 *Med.* 2003;348(24):2379-85.
- 6  
7 36. Mercer BM, Goldenberg RL, Moawad AH, Meis PJ, Iams JD, Das AF, et al. The preterm  
8 prediction study: effect of gestational age and cause of preterm birth on subsequent obstetric  
9 outcome. National Institute of Child Health and Human Development Maternal-Fetal Medicine  
10 Units Network. *Am J Obstet Gynecol.* 1999;181(5 Pt 1):1216-21.
- 11 37. Owen J, Yost N, Berghella V, Thom E, Swain M, Dildy GA, 3rd, et al. Mid-trimester  
12 endovaginal sonography in women at high risk for spontaneous preterm birth. *JAMA.*  
13 2001;286(11):1340-8.
- 14 38. Rittenberg C, Newman RB, Istwan NB, Rhea DJ, Stanziano GJ. Preterm birth prevention  
15 by 17 alpha-hydroxyprogesterone caproate vs. daily nursing surveillance. *J Reprod Med.*  
16 2009;54(2):47-52.
- 17 39. Turitz AL, Bastek JA, Purisch SE, Elovitz MA, Levine LD. Patient characteristics  
18 associated with 17-alpha hydroxyprogesterone caproate use among a high-risk cohort. *Am J*  
19 *Obstet Gynecol.* 2016;214(4):536 e1-5.
- 20 40. Vermeulen GM, Bruinse HW. Prophylactic administration of clindamycin 2% vaginal  
21 cream to reduce the incidence of spontaneous preterm birth in women with an increased  
22 recurrence risk: a randomised placebo-controlled double-blind trial. *Br J Obstet Gynaecol.*  
23 1999;106(7):652-7.
- 24 41. Vogel I, Goepfert AR, Thorsen P, Skogstrand K, Hougaard DM, Curry AH, et al. Early  
25 second-trimester inflammatory markers and short cervical length and the risk of recurrent  
26 preterm birth. *J Reprod Immunol.* 2007;75(2):133-40.
- 27 42. Wallace JM, Bhattacharya S, Campbell DM, Horgan GW. Inter-Pregnancy Weight  
28 Change and the Risk of Recurrent Pregnancy Complications. *PLoS One.* 2016;11(5):e0154812.
- 29 43. Yamashita M, Hayashi S, Endo M, Okuno K, Fukui O, Mimura K, et al. Incidence and  
30 risk factors for recurrent spontaneous preterm birth: A retrospective cohort study in Japan. *J*  
31 *Obstet Gynaecol Res.* 2015;41(11):1708-14.
- 32 44. Yang J, Baer RJ, Berghella V, Chambers C, Chung P, Coker T, et al. Recurrence of  
33 Preterm Birth and Early Term Birth. *Obstet Gynecol.* 2016;128(2):364-72.
- 34 45. Kazemier BM, Buijs PE, Mignini L, Limpens J, de Groot CJ, Mol BW, et al. Impact of  
35 obstetric history on the risk of spontaneous preterm birth in singleton and multiple pregnancies: a  
36 systematic review. *BJOG.* 2014;121(10):1197-209.
- 37 46. Kamath-Rayne BD, DeFranco EA, Chung E, Chen A. Subtypes of preterm birth and the  
38 risk of postneonatal death. *J Pediatr.* 2013;162(1):28-34 e2.
- 39 47. Villar J, Abalos E, Carroli G, Giordano D, Wojdyla D, Piaggio G, et al. Heterogeneity of  
40 perinatal outcomes in the preterm delivery syndrome. *Obstet Gynecol.* 2004;104(1):78-87.
- 41 48. Chen A, Feresu SA, Barsoom MJ. Heterogeneity of preterm birth subtypes in relation to  
42 neonatal death. *Obstet Gynecol.* 2009;114(3):516-22.
- 43 49. Newman DE, Paamoni-Keren O, Press F, Wiznitzer A, Mazor M, Sheiner E. Neonatal  
44 outcome in preterm deliveries between 23 and 27 weeks' gestation with and without preterm  
45 premature rupture of membranes. *Arch Gynecol Obstet.* 2009;280(1):7-11.
- 46 50. Basso O, Wilcox A. Mortality risk among preterm babies: immaturity versus underlying  
47 pathology. *Epidemiology.* 2010;21(4):521-7.
- 48  
49  
50  
51  
52  
53  
54  
55  
56  
57  
58  
59  
60

- 1
  - 2
  - 3
  - 4
  - 5
  - 6
  - 7
  - 8
  - 9
  - 10
  - 11
  - 12
  - 13
  - 14
  - 15
  - 16
  - 17
  - 18
  - 19
  - 20
  - 21
  - 22
  - 23
  - 24
  - 25
  - 26
  - 27
  - 28
  - 29
  - 30
  - 31
  - 32
  - 33
  - 34
  - 35
  - 36
  - 37
  - 38
  - 39
  - 40
  - 41
  - 42
  - 43
  - 44
  - 45
  - 46
  - 47
  - 48
  - 49
  - 50
  - 51
  - 52
  - 53
  - 54
  - 55
  - 56
  - 57
  - 58
  - 59
  - 60
51. Brown HK, Speechley KN, Macnab J, Natale R, Campbell MK. Neonatal morbidity associated with late preterm and early term birth: the roles of gestational age and biological determinants of preterm birth. *Int J Epidemiol.* 2014;43(3):802-14.
52. Newnham JP, Dickinson JE, Hart RJ, Pennell CE, Arrese CA, Keelan JA. Strategies to prevent preterm birth. *Front Immunol.* 2014;5:584.
53. Betran AP, Say L, Gulmezoglu AM, Allen T, Hampson L. Effectiveness of different databases in identifying studies for systematic reviews: experience from the WHO systematic review of maternal morbidity and mortality. *BMC Med Res Methodol.* 2005;5(1):6.

For peer review only

1  
2  
3  
4  
5  
6  
7  
8  
9  
10  
11  
12  
13  
14  
15  
16  
17  
18  
19  
20  
21  
22  
23  
24  
25  
26  
27  
28  
29  
30  
31  
32  
33  
34  
35  
36  
37  
38  
39  
40  
41  
42  
43  
44  
45  
46  
47  
48  
49  
50  
51  
52  
53  
54  
55  
56  
57  
58  
59  
60

Figure 1: Flow diagram of included studies

Figure 2. Forest plot of the rate of recurrent spontaneous preterm birth at <37 weeks gestation

Figure 3. Forest plots of the rate of (a) recurrent PPROM and (b) recurrent PTL at <37 weeks gestation

For peer review only

1  
2  
3  
4  
5  
6  
7  
8  
9  
10  
11  
12  
13  
14  
15  
16  
17  
18  
19  
20  
21  
22  
23  
24  
25  
26  
27  
28  
29  
30  
31  
32  
33  
34  
35  
36  
37  
38  
39  
40  
41  
42  
43  
44  
45  
46  
47  
48  
49  
50  
51  
52  
53  
54  
55  
56  
57  
58  
59  
60

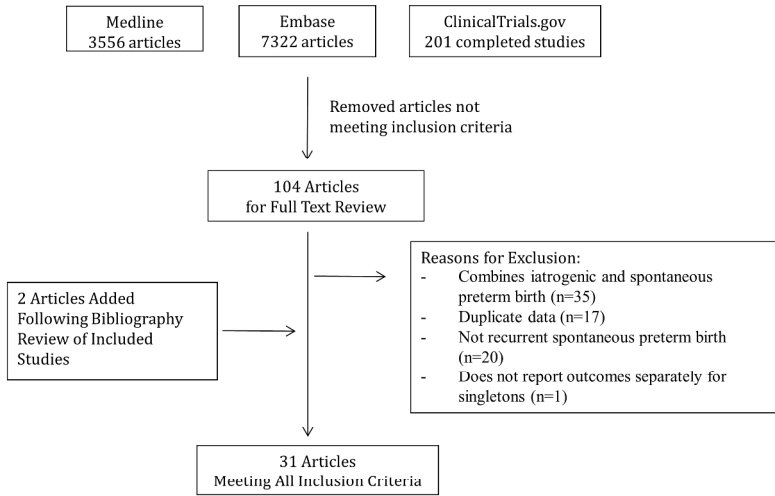

Figure 1

254x190mm (300 x 300 DPI)

ew only



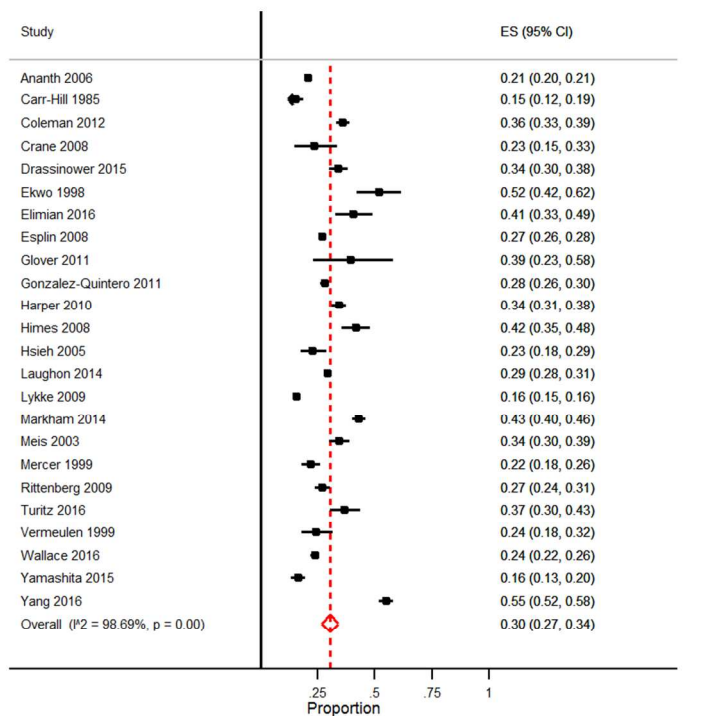

Figure 2

254x190mm (300 x 300 DPI)

ew only

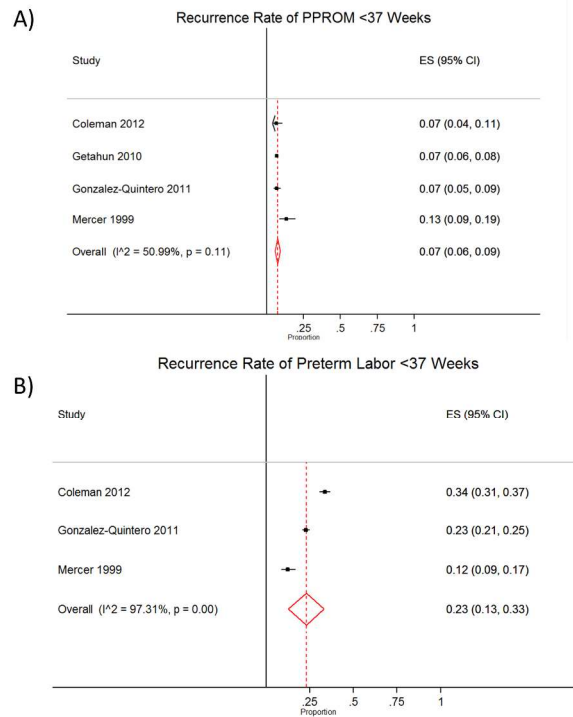

Figure 3

254x190mm (300 x 300 DPI)

ew only

1  
2  
3 Appendix A. Search Strategy  
4  
5  
6

7 Search Strategy:

- 8 1. Premature Birth
  - 9 2. ((preterm or pre-term or premature or pre-mature) and (birth\* or childbirth\* or deliver\*  
10 or parturit\*))
  - 11 3. Fetal Membranes, Premature Rupture
  - 12 4. pprom
  - 13 5. Obstetric Labor, Premature
  - 14 6. ((preterm or pre-term or premature or pre-mature) and (labor or labour))
  - 15 7. Recurrence
  - 16 8. recur\* or repeat
  - 17 9. (1 or 2 or 3 or 4 or 5 or 6) and (7 or 8)
- 18  
19  
20  
21

22 Initial Search Run on June 17, 2015

23 Updated Search Run on July 29, 2016  
24  
25  
26  
27  
28  
29  
30  
31  
32  
33  
34  
35  
36  
37  
38  
39  
40  
41  
42  
43  
44  
45  
46  
47  
48  
49  
50  
51  
52  
53  
54  
55  
56  
57  
58  
59  
60

1  
2  
3  
4  
5  
6  
7  
8  
9  
10  
11  
12  
13  
14  
15  
16  
17  
18  
19  
20  
21  
22  
23  
24  
25  
26  
27  
28  
29  
30  
31  
32  
33  
34  
35  
36  
37  
38  
39  
40  
41  
42  
43  
44  
45  
46  
47  
48  
49

Appendix B. Included studies

Table B1 – Recurrence rate of spontaneous preterm birth

| Author              | Time Period | Country | Study Design | Inclusion/Exclusion Criteria                                                                                                                                                                                                                                            | Gestational Age at Spontaneous Preterm Birth (weeks) |             | Recurrence Rate of Spontaneous Preterm Birth |
|---------------------|-------------|---------|--------------|-------------------------------------------------------------------------------------------------------------------------------------------------------------------------------------------------------------------------------------------------------------------------|------------------------------------------------------|-------------|----------------------------------------------|
|                     |             |         |              |                                                                                                                                                                                                                                                                         | Pregnancy 1                                          | Pregnancy 2 |                                              |
| Ananth 2006 (14)    | 1989-1997   | USA     | Cohort       | <i>Inclusion:</i> Prior sPTB<br><i>Exclusion:</i> Multiple gestation pregnancies                                                                                                                                                                                        | <37                                                  | <37         | 2,626/12,670 (20.7%)                         |
|                     |             |         |              |                                                                                                                                                                                                                                                                         |                                                      | <35         | 698/12,670 (5.5%)                            |
|                     |             |         |              |                                                                                                                                                                                                                                                                         |                                                      | <32         | 164/12,670 (1.3%)                            |
|                     |             |         |              |                                                                                                                                                                                                                                                                         | <35                                                  | <35         | 698/4,463 (15.6%)                            |
|                     |             |         |              |                                                                                                                                                                                                                                                                         | <32                                                  | <32         | 164/2,022 (8.1%)                             |
| Asrat 1991 (15)     |             | USA     | Cohort       | <i>Inclusion:</i> Prior PPRM<br><i>Exclusion:</i> Incompetent cervix, uterine anomalies, diethylstilbestrol exposure, multiple gestations, and neonates with congenital anomalies                                                                                       | <36                                                  | <36         | 39/121 (32.2%)                               |
| Care 2014 (16)      | 2010-2012   | UK      | Cohort       | <i>Inclusion:</i> Prior sPTB or PROM; cervical length >25mm at 20-24 weeks<br><i>Exclusion:</i> Prior cervical surgery, non-viable pregnancy, history of iPTB, cerclage, uterine anomalies, Ehlers-Danlos syndrome, intrauterine death, twins, congenital abnormalities | <34                                                  | <37         | 53/196 (27.0%)                               |
|                     |             |         |              |                                                                                                                                                                                                                                                                         |                                                      | <34         | 32/196 (16.3%)                               |
| Carr-Hill 1985 (17) | unspecified | UK      | Cohort       | <i>Inclusion:</i> Prior sPTB, singleton<br><i>Exclusion:</i> Multiple gestation, stillbirth, induced labor                                                                                                                                                              | <37                                                  | <37         | 76/494 (15.4%)                               |

| Author                | Time Period | Country | Study Design | Inclusion/Exclusion Criteria                                                                                                                                                                                                                                                                                               | Gestational Age at Spontaneous Preterm Birth (weeks) |             | Recurrence Rate of Spontaneous Preterm Birth |
|-----------------------|-------------|---------|--------------|----------------------------------------------------------------------------------------------------------------------------------------------------------------------------------------------------------------------------------------------------------------------------------------------------------------------------|------------------------------------------------------|-------------|----------------------------------------------|
|                       |             |         |              |                                                                                                                                                                                                                                                                                                                            | Pregnancy 1                                          | Pregnancy 2 |                                              |
| Coleman 2012 (18)     | 2007-2010   | USA     | Cohort       | <i>Inclusion:</i> Prior sPTB, received 17P injections<br><i>Exclusion:</i> Non-compliance with 17P injections                                                                                                                                                                                                              | <37                                                  | <37         | 426/1,183 (36.0%)                            |
|                       |             |         |              |                                                                                                                                                                                                                                                                                                                            |                                                      | <35         | 156/1,183 (13.2%)                            |
|                       |             |         |              |                                                                                                                                                                                                                                                                                                                            |                                                      | <32         | 61/1,183 (5.2%)                              |
| Crane 2008 (19)       | 2000-2006   | Canada  | Cohort       | <i>Inclusion:</i> Prior sPTB<br><i>Exclusion:</i> Cervical cerclage                                                                                                                                                                                                                                                        | <37                                                  | <37         | 21/90 (23.3%)                                |
|                       |             |         |              |                                                                                                                                                                                                                                                                                                                            |                                                      | <35         | 11/90 (12.2%)                                |
|                       |             |         |              |                                                                                                                                                                                                                                                                                                                            |                                                      | <34         | 8/90 (8.9%)                                  |
| Drassinower 2015 (20) | 2009-2014   | USA     | Cohort       | <i>Inclusion:</i> Prior sPTB, singleton<br><i>Exclusion:</i> Multiple gestations, major fetal anomalies, cerclage, history of iPTB or placental abruption                                                                                                                                                                  | <37                                                  | <37         | 178/522 (34.1%)                              |
|                       |             |         |              |                                                                                                                                                                                                                                                                                                                            |                                                      | <34         | 78/522 (14.9%)                               |
|                       |             |         |              |                                                                                                                                                                                                                                                                                                                            |                                                      | <28         | 34/522 (6.5%)                                |
| Ekwo 1998 (21)        | 1988-1993   | USA     | Cohort       | <i>Inclusion:</i> Prior sPTB<br><i>Exclusion:</i> Fetal loss, multiple gestation                                                                                                                                                                                                                                           | <37                                                  | <37         | 56/108 (51.9%)                               |
| Elimian 2016 (22)     | 2007-2010   | USA     | RCT          | <i>Inclusion:</i> Prior sPTB<br><i>Exclusion:</i> Multiple gestation, major fetal anomaly or chromosomal anomalies, prior progesterone use in the current pregnancy, use of heparin in the current pregnancy, uterine anomaly, maternal medical conditions, no ultrasound before 20 <sup>+6</sup> in the current pregnancy | <37                                                  | <37         | 59/145 (40.7%)                               |
|                       |             |         |              |                                                                                                                                                                                                                                                                                                                            |                                                      | <34         | 27/145 (18.6%)                               |
|                       |             |         |              |                                                                                                                                                                                                                                                                                                                            |                                                      | <28         | 15/145 (10.3%)                               |
| Esplin 2008 (23)      | 1989-2001   | USA     | Cohort       | <i>Inclusion:</i> First live birth in Utah and a subsequent live birth in the study period                                                                                                                                                                                                                                 | <37                                                  | <37         | 1663/6,199 (26.8%)                           |
|                       |             |         |              |                                                                                                                                                                                                                                                                                                                            | <34                                                  | <37         | 587/1,669 (35.2%)                            |

1  
2  
3  
4  
5  
6  
7  
8  
9  
10  
11  
12  
13  
14  
15  
16  
17  
18  
19  
20  
21  
22  
23  
24  
25  
26  
27  
28  
29  
30  
31  
32  
33  
34  
35  
36  
37  
38  
39  
40  
41  
42  
43  
44  
45  
46  
47  
48  
49

| Author                           | Time Period | Country | Study Design | Inclusion/Exclusion Criteria                                                                                                                    | Gestational Age at Spontaneous Preterm Birth (weeks) |             | Recurrence Rate of Spontaneous Preterm Birth |
|----------------------------------|-------------|---------|--------------|-------------------------------------------------------------------------------------------------------------------------------------------------|------------------------------------------------------|-------------|----------------------------------------------|
|                                  |             |         |              |                                                                                                                                                 | Pregnancy 1                                          | Pregnancy 2 |                                              |
|                                  |             |         |              |                                                                                                                                                 |                                                      | <34         | 299/1,669 (17.9%)                            |
| Getahun 2010 (24)<br>*PPROM only | 1989-1997   | USA     | Cohort       | <i>Inclusion:</i> Prior PPRM<br><i>Exclusion:</i> Multiple gestations, births <20 weeks, non White or Black race, >1 pregnancy before 1989      | <37                                                  | <37         | 157/2,259 (6.9%)                             |
|                                  |             |         |              |                                                                                                                                                 | <34                                                  | <34         | 97/1,071 (9.1%)                              |
|                                  |             |         |              |                                                                                                                                                 | <32                                                  | <32         | 67/697 (9.6%)                                |
|                                  |             |         |              |                                                                                                                                                 | <28                                                  | <28         | 22/323 (6.8%)                                |
| Glover 2011 (25)                 | 2006-2009   | USA     | RCT          | <i>Inclusion:</i> Prior sPTB, initiated prenatal care prior to 20 weeks gestation<br><i>Exclusion:</i> Multiple gestations, major fetal anomaly | <37                                                  | <37         | 13/33 (39.4%)                                |
| Goldenberg 2006 (26)             | 1996-2001   | USA     | Cohort       | <i>Inclusion:</i> Prior sPTB                                                                                                                    | <32                                                  | <37         | 71/83 (85.5%)                                |
| Gonzalez-Quintero 2011 (27)      | 2006-2009   | USA     | Cohort       | <i>Inclusion:</i> Prior sPTB, singleton<br><i>Exclusion:</i> iPTB, >1 prior PTB, cerclage in current pregnancy                                  | <37                                                  | <37         | 597/2,123 (28.1%)                            |
|                                  |             |         |              |                                                                                                                                                 |                                                      | <35         | 274/2,123 (12.9%)                            |
|                                  |             |         |              |                                                                                                                                                 |                                                      | <32         | 113/2,123 (5.3%)                             |

| Author            | Time Period | Country | Study Design | Inclusion/Exclusion Criteria                                                                                                                                                                                                                                                                                                                                                                                                                                            | Gestational Age at Spontaneous Preterm Birth (weeks) |             | Recurrence Rate of Spontaneous Preterm Birth |
|-------------------|-------------|---------|--------------|-------------------------------------------------------------------------------------------------------------------------------------------------------------------------------------------------------------------------------------------------------------------------------------------------------------------------------------------------------------------------------------------------------------------------------------------------------------------------|------------------------------------------------------|-------------|----------------------------------------------|
|                   |             |         |              |                                                                                                                                                                                                                                                                                                                                                                                                                                                                         | Pregnancy 1                                          | Pregnancy 2 |                                              |
| Harper 2010 (28)  | 2005-2006   | USA     | RCT          | <i>Inclusion:</i> Prior sPTB, singleton<br><i>Exclusion:</i> Major fetal anomaly, intake of a fish oil supplement >500mg/week at any time during the preceding month, allergy to fish, anticoagulation therapy, hypertension, White's classification D or higher diabetes, drug or alcohol abuse, seizure disorder, uncontrolled thyroid disease, clotting disorder, current or planned cerclage, or a plan to deliver either elsewhere or before 37 weeks of gestation | <37                                                  | <37         | 292/852 (34.3%)                              |
| Himes 2008 (29)   | 2001-2006   | USA     | Cohort       | <i>Inclusion:</i> Prior sPTB placenta pathology information available                                                                                                                                                                                                                                                                                                                                                                                                   | <37                                                  | <37         | 102/245 (41.6%)                              |
| Hsieh 2005 (30)   | 1991-1997   | Taiwan  | Cohort       | <i>Exclusion:</i> Multiple gestation, fetal anomaly, cervical incompetence, stillbirth, iPTB                                                                                                                                                                                                                                                                                                                                                                            | <37                                                  | <37         | 52/228 (22.8%)                               |
| Laughon 2014 (31) | 2002-2010   | USA     | Cohort       | <i>Inclusion:</i> Singleton pregnancies                                                                                                                                                                                                                                                                                                                                                                                                                                 | <37                                                  | <37         | 921/3,139 (29.3%)                            |
| Lykke 2009 (32)   | 1978-2007   | Denmark | Cohort       | <i>Inclusion:</i> Maternal age between 15-50<br><i>Exclusion:</i> Women with cardiovascular disease, type 1 or 2 diabetes, women who emigrated within 3 months of 2nd delivery                                                                                                                                                                                                                                                                                          | <37                                                  | <37         | 2742/17,334 (15.8%)                          |
|                   |             |         |              |                                                                                                                                                                                                                                                                                                                                                                                                                                                                         | <33                                                  |             | 444/1,734 (25.6%)                            |
|                   |             |         |              |                                                                                                                                                                                                                                                                                                                                                                                                                                                                         | <28                                                  |             | 139/535 (26.0%)                              |

| Author            | Time Period | Country | Study Design | Inclusion/Exclusion Criteria                                                                                                                                                                                                                                                    | Gestational Age at Spontaneous Preterm Birth (weeks) |             | Recurrence Rate of Spontaneous Preterm Birth |
|-------------------|-------------|---------|--------------|---------------------------------------------------------------------------------------------------------------------------------------------------------------------------------------------------------------------------------------------------------------------------------|------------------------------------------------------|-------------|----------------------------------------------|
|                   |             |         |              |                                                                                                                                                                                                                                                                                 | Pregnancy 1                                          | Pregnancy 2 |                                              |
| Manuck 2011 (33)  | 2002-2010   | USA     | Cohort       | <i>Inclusion:</i> Prior sPTB, singleton<br><i>Exclusion:</i> History of iPTB or incompetent cervix                                                                                                                                                                              | <35                                                  | <37         | 131/223 (58.7%)                              |
|                   |             |         |              |                                                                                                                                                                                                                                                                                 |                                                      | <32         | 25/223 (11.2%)                               |
| Markham 2014 (34) | 1998-2012   | USA     | Cohort       | <i>Inclusion:</i> Prior sPTB<br><i>Exclusion:</i> Multiple gestations, known uterine anomalies,                                                                                                                                                                                 | <37                                                  | <37         | 459/1,066 (43.1%)                            |
|                   |             |         |              |                                                                                                                                                                                                                                                                                 |                                                      | <35         | 269/1,066 (25.2%)                            |
|                   |             |         |              |                                                                                                                                                                                                                                                                                 |                                                      | <32         | 139/1,066 (13.0%)                            |
| Meis 2003 (35)    | 1999-2002   | USA     | RCT          | <i>Inclusion:</i> Prior sPTB<br><i>Exclusion:</i> Multiple gestations, fetal anomaly, progesterone or heparin treatment during the current pregnancy, current or planned cervical cerclage, hypertension requiring medication, seizure disorder, or a plan to deliver elsewhere | <37                                                  | <37         | 159/463 (34.3%)                              |
| Mercer 1999 (36)  | 1992-1994   | USA     | Cohort       | <i>Inclusion:</i> Singleton<br><i>Exclusion:</i> Placenta previa, major fetal malformations, cervical cerclage, polyhydramnios, oligohydramnios, cervical dilatation of $\geq 2$ cm for nulliparous women and $\geq 3$ cm for multiparous women.                                | <37                                                  | <37         | 89/410 (21.7%)                               |
|                   |             |         |              |                                                                                                                                                                                                                                                                                 |                                                      | <35         | 55/410 (13.4%)                               |
|                   |             |         |              |                                                                                                                                                                                                                                                                                 |                                                      | <32         | 21/410 (5.1%)                                |
|                   |             |         |              |                                                                                                                                                                                                                                                                                 |                                                      | <30         | 12/410 (2.9%)                                |
|                   |             |         |              |                                                                                                                                                                                                                                                                                 |                                                      | <28         | 10/410 (2.4%)                                |
| Owen 2001 (37)    | 1997-1999   | USA     | Cohort       | <i>Inclusion:</i> Prior sPTB, singleton<br><i>Exclusion:</i> chronic medical or obstetrical problems, history of                                                                                                                                                                | <32                                                  | <35         | 48/183 (26.2%)                               |
|                   |             |         |              |                                                                                                                                                                                                                                                                                 |                                                      | <32         | 35/183 (19.1%)                               |
|                   |             |         |              |                                                                                                                                                                                                                                                                                 |                                                      | <28         | 29/183 (15.8%)                               |



| Author               | Time Period | Country     | Study Design | Inclusion/Exclusion Criteria                                                                                                                                                                            | Gestational Age at Spontaneous Preterm Birth (weeks) |             | Recurrence Rate of Spontaneous Preterm Birth |
|----------------------|-------------|-------------|--------------|---------------------------------------------------------------------------------------------------------------------------------------------------------------------------------------------------------|------------------------------------------------------|-------------|----------------------------------------------|
|                      |             |             |              |                                                                                                                                                                                                         | Pregnancy 1                                          | Pregnancy 2 |                                              |
|                      |             |             |              | substance abuse, uterine anomalies, cerclage                                                                                                                                                            |                                                      | <24         | 20/183 (10.9%)                               |
| Rittenberg 2009 (38) | 1995-2005   | USA         | Cohort       | <i>Inclusion:</i> Prior sPTB, singleton pregnancies, referred for weekly 17P administration<br><i>Exclusion:</i> Diagnosis of preterm labour, cerclage or vaginal bleeding at enrollment                | <37                                                  | <37         | 185/684 (27.0%)                              |
|                      |             |             |              |                                                                                                                                                                                                         |                                                      | <35         | 78/684 (11.4%)                               |
|                      |             |             |              |                                                                                                                                                                                                         |                                                      | <32         | 30/684 (4.4%)                                |
| Turitz 2016 (39)     | 2009-2013   | USA         | Cohort       | <i>Inclusion:</i> Prior sPTB                                                                                                                                                                            | <37                                                  | <37         | 80/218 (36.7%)                               |
| Vermeulen 1999 (40)  | 1994-1996   | Netherlands | RCT          | <i>Inclusion:</i> Prior sPTB<br><i>Exclusion:</i> Fetal anomaly, previous iPTB, known allergy to clindamycin                                                                                            | <37                                                  | <37         | 41/168 (24.4%)                               |
|                      |             |             |              |                                                                                                                                                                                                         |                                                      | <34         | 14/168 (8.3%)                                |
| Vogel 2007 (41)      | 2000-2001   | USA         | Cohort       | <i>Inclusion:</i> Prior sPTB<br><i>Exclusion:</i> Multiple gestations, ruptured membranes, cerclage in a previous pregnancy                                                                             | <30                                                  | <37         | 20/62 (32.3%)                                |
|                      |             |             |              |                                                                                                                                                                                                         |                                                      | <35         | 15/62 (24.2%)                                |
| Wallace 2016 (42)    | 1986-2013   | UK          | Cohort       |                                                                                                                                                                                                         | <37                                                  | <37         | 449/1,900 (23.6%)                            |
| Yamashita 2015 (43)  | 2008-2012   | Japan       | Cohort       | <i>Inclusion:</i> Prior sPTB<br><i>Exclusion:</i> First antenatal visit after 14 weeks, previous iPTB, placenta previa, placental abruption, multiple gestation, fetal anomaly, antepartum fetal demise | <37                                                  | <37         | 89/547 (16.3%)                               |
|                      |             |             |              |                                                                                                                                                                                                         |                                                      | <34         | 28/547 (5.1%)                                |
|                      |             |             |              |                                                                                                                                                                                                         |                                                      | <28         | 10/547 (1.8%)                                |

1  
2  
3  
4  
5  
6  
7  
8  
9  
10  
11  
12  
13  
14  
15  
16  
17  
18  
19  
20  
21  
22  
23  
24  
25  
26  
27  
28  
29  
30  
31  
32  
33  
34  
35  
36  
37  
38  
39  
40  
41  
42  
43  
44  
45  
46  
47  
48  
49

| Author         | Time Period | Country | Study Design | Inclusion/Exclusion Criteria | Gestational Age at Spontaneous Preterm Birth (weeks) |             | Recurrence Rate of Spontaneous Preterm Birth |
|----------------|-------------|---------|--------------|------------------------------|------------------------------------------------------|-------------|----------------------------------------------|
|                |             |         |              |                              | Pregnancy 1                                          | Pregnancy 2 |                                              |
| Yang 2016 (44) | 2005-2011   | USA     | Cohort       |                              | <37                                                  | <37         | 588/1,068 (55.1%)                            |
|                |             |         |              |                              |                                                      | <32         | 71/1,068 (6.6%)                              |
|                |             |         |              |                              | <32                                                  | <32         | 43/177 (24.3%)                               |

Table B2 – Occurrence of Indicated Preterm Birth Following Spontaneous Preterm Birth

| Author            | Time Period | Country | Study Design | Inclusion/Exclusion Criteria                                                                                                                                                                                                                                                                                                                                                                                                                                            | Gestational Age at Preterm Birth (weeks) |             | Occurrence Rate of Indicated Preterm Birth Following a Prior Spontaneous Preterm Birth |
|-------------------|-------------|---------|--------------|-------------------------------------------------------------------------------------------------------------------------------------------------------------------------------------------------------------------------------------------------------------------------------------------------------------------------------------------------------------------------------------------------------------------------------------------------------------------------|------------------------------------------|-------------|----------------------------------------------------------------------------------------|
|                   |             |         |              |                                                                                                                                                                                                                                                                                                                                                                                                                                                                         | Pregnancy 1                              | Pregnancy 2 |                                                                                        |
| Ananth 2006 (14)  | 1989-1997   | USA     | Cohort       | <i>Inclusion:</i> Prior sPTB<br><i>Exclusion:</i> Multiple gestation pregnancies                                                                                                                                                                                                                                                                                                                                                                                        | <37                                      | <37         | 342/12,670 (2.70%)                                                                     |
|                   |             |         |              |                                                                                                                                                                                                                                                                                                                                                                                                                                                                         |                                          | <35         | 121/12,670 (0.96%)                                                                     |
|                   |             |         |              |                                                                                                                                                                                                                                                                                                                                                                                                                                                                         |                                          | <32         | 40/12,670 (0.32%)                                                                      |
|                   |             |         |              |                                                                                                                                                                                                                                                                                                                                                                                                                                                                         | <35                                      | <35         | 121/4,463 (2.71%)                                                                      |
|                   |             |         |              |                                                                                                                                                                                                                                                                                                                                                                                                                                                                         | <32                                      | <32         | 40/2,022 (1.98%)                                                                       |
| Harper 2010 (28)  | 2005-2006   | USA     | RCT          | <i>Inclusion:</i> Prior sPTB, singleton<br><i>Exclusion:</i> Major fetal anomaly, intake of a fish oil supplement >500mg/week at any time during the preceding month, allergy to fish, anticoagulation therapy, hypertension, White's classification D or higher diabetes, drug or alcohol abuse, seizure disorder, uncontrolled thyroid disease, clotting disorder, current or planned cerclage, or a plan to deliver either elsewhere or before 37 weeks of gestation | <37                                      | <37         | 46/852 (5.63%)                                                                         |
| Laughon 2014 (31) | 2002-2010   | USA     | Cohort       | <i>Inclusion:</i> Singleton pregnancies                                                                                                                                                                                                                                                                                                                                                                                                                                 | <37                                      | <37         | 17/3,139 (0.54%)                                                                       |

1  
2  
3  
4  
5  
6  
7  
8  
9  
10  
11  
12  
13  
14  
15  
16  
17  
18  
19  
20  
21  
22  
23  
24  
25  
26  
27  
28  
29  
30  
31  
32  
33  
34  
35  
36  
37  
38  
39  
40  
41  
42  
43  
44  
45  
46  
47  
48  
49

| Author               | Time Period | Country | Study Design | Inclusion/Exclusion Criteria                                                                                                                                                                                                                                                    | Gestational Age at Preterm Birth (weeks) |     | Occurrence Rate of Indicated Preterm Birth Following a Prior Spontaneous Preterm Birth |
|----------------------|-------------|---------|--------------|---------------------------------------------------------------------------------------------------------------------------------------------------------------------------------------------------------------------------------------------------------------------------------|------------------------------------------|-----|----------------------------------------------------------------------------------------|
|                      |             |         |              |                                                                                                                                                                                                                                                                                 | 1                                        | 2   |                                                                                        |
| Meis 2003 (35)       | 1999-2002   | USA     | RCT          | <i>Inclusion:</i> Prior sPTB<br><i>Exclusion:</i> Multiple gestations, fetal anomaly, progesterone or heparin treatment during the current pregnancy, current or planned cervical cerclage, hypertension requiring medication, seizure disorder, or a plan to deliver elsewhere | <37                                      | <37 | 36/463 (7.78%)                                                                         |
| Owen 2001 (37)       | 1997-1999   | USA     | Cohort       | <i>Inclusion:</i> Prior sPTB, singleton<br><i>Exclusion:</i> chronic medical or obstetrical problems, history of substance abuse, uterine anomalies, cerclage                                                                                                                   | <32                                      | <35 | 5/183 (2.73%)                                                                          |
| Rittenberg 2009 (38) | 1995-2005   | USA     | Cohort       | <i>Inclusion:</i> Prior sPTB, singleton pregnancies, referred for weekly 17P administration<br><i>Exclusion:</i> Diagnosis of preterm labour, cerclage or vaginal bleeding at enrollment                                                                                        | <37                                      | <37 | 84/684 (12.28%)                                                                        |

| Author              | Time Period | Country | Study Design | Inclusion/Exclusion Criteria                                                                                                                                                                            | Gestational Age at Preterm Birth (weeks) |             | Occurrence Rate of Indicated Preterm Birth Following a Prior Spontaneous Preterm Birth |
|---------------------|-------------|---------|--------------|---------------------------------------------------------------------------------------------------------------------------------------------------------------------------------------------------------|------------------------------------------|-------------|----------------------------------------------------------------------------------------|
|                     |             |         |              |                                                                                                                                                                                                         | Pregnancy 1                              | Pregnancy 2 |                                                                                        |
| Yamashita 2015 (43) | 2008-2012   | Japan   | Cohort       | <i>Inclusion:</i> Prior sPTB<br><i>Exclusion:</i> First antenatal visit after 14 weeks, previous iPTB, placenta previa, placental abruption, multiple gestation, fetal anomaly, antepartum fetal demise | <37                                      | <37         | 23/547 (4.20%)                                                                         |

1  
2  
3  
4  
5  
6  
7  
8  
9  
10  
11  
12  
13  
14  
15  
16  
17  
18  
19  
20  
21  
22  
23  
24  
25  
26  
27  
28  
29  
30  
31  
32  
33  
34  
35  
36  
37  
38  
39  
40  
41  
42  
43  
44  
45  
46  
47  
48  
49

Appendix C: Quality Assessment

Table C1 – Quality Scores for Included Cohort Studies

| Cohort Studies (Newcastle Ottawa Scale (12)) |                                              |                                            |                                  |                                                                                 |                                                                    |                              |                                                        |                                         |
|----------------------------------------------|----------------------------------------------|--------------------------------------------|----------------------------------|---------------------------------------------------------------------------------|--------------------------------------------------------------------|------------------------------|--------------------------------------------------------|-----------------------------------------|
| Author                                       | Representatives of the exposed cohort (0, 1) | Selection of the non-exposed cohort (0, 1) | Ascertainment of exposure (0, 1) | Demonstration that outcome of interest was not present at start of study (0, 1) | Comparability of cohorts on the basis of design or analysis (0, 1) | Assessment of outcome (0, 1) | Was follow-up long enough for outcomes to occur (0, 1) | Adequacy of follow-up of cohorts (0, 1) |
| Ananth 2006 (14)<br><i>Score: 4/6</i>        | 1                                            | N/A                                        | 0                                | 1                                                                               | N/A                                                                | 0                            | 1                                                      | 1                                       |
| Asrat 1991 (15)<br><i>Score: 5/6</i>         | 0                                            | N/A                                        | 1                                | 1                                                                               | N/A                                                                | 1                            | 1                                                      | 1                                       |
| Care 2014 (16)<br><i>Score: 5/6</i>          | 0                                            | N/A                                        | 1                                | 1                                                                               | N/A                                                                | 1                            | 1                                                      | 1                                       |
| Carr-Hill 1985 (17)<br><i>Score: 4/6</i>     | 1                                            | N/A                                        | 0                                | 1                                                                               | N/A                                                                | 0                            | 1                                                      | 1                                       |
| Coleman 2012 (18)<br><i>Score: 5/6</i>       | 0                                            | N/A                                        | 1                                | 1                                                                               | N/A                                                                | 1                            | 1                                                      | 1                                       |
| Crane 2008 (19)<br><i>Score: 5/6</i>         | 0                                            | N/A                                        | 1                                | 1                                                                               | N/A                                                                | 1                            | 1                                                      | 1                                       |

| Author                                                | Cohort Studies (Newcastle Ottawa Scale (12)) |                                            |                                  |                                                                                 |                                                                    |                              |                                                        | Adequacy of follow-up of cohorts (0, 1) |
|-------------------------------------------------------|----------------------------------------------|--------------------------------------------|----------------------------------|---------------------------------------------------------------------------------|--------------------------------------------------------------------|------------------------------|--------------------------------------------------------|-----------------------------------------|
|                                                       | Representatives of the exposed cohort (0, 1) | Selection of the non-exposed cohort (0, 1) | Ascertainment of exposure (0, 1) | Demonstration that outcome of interest was not present at start of study (0, 1) | Comparability of cohorts on the basis of design or analysis (0, 1) | Assessment of outcome (0, 1) | Was follow-up long enough for outcomes to occur (0, 1) |                                         |
| Drassinower 2015 (20)<br><i>Score: 5/6</i>            | 0                                            | N/A                                        | 1                                | 1                                                                               | N/A                                                                | 1                            | 1                                                      | 1                                       |
| Ekwo 1998 (21)<br><i>Score: 5/6</i>                   | 0                                            | N/A                                        | 1                                | 1                                                                               | N/A                                                                | 1                            | 1                                                      | 1                                       |
| Esplin 2008 (23)<br><i>Score: 4/6</i>                 | 1                                            | N/A                                        | 0                                | 1                                                                               | N/A                                                                | 0                            | 1                                                      | 1                                       |
| Getahun 2010 (24)<br>*PPROM only<br><i>Score: 4/6</i> | 1                                            | N/A                                        | 0                                | 1                                                                               | N/A                                                                | 0                            | 1                                                      | 1                                       |
| Goldenberg 2006 (26)<br><i>Score: 5/6</i>             | 0                                            | N/A                                        | 1                                | 1                                                                               | N/A                                                                | 1                            | 1                                                      | 1                                       |
| Gonzalez-Quintero 2011 (27)<br><i>Score: 5/6</i>      | 0                                            | N/A                                        | 1                                | 1                                                                               | N/A                                                                | 1                            | 1                                                      | 1                                       |

1  
2  
3  
4  
5  
6  
7  
8  
9  
10  
11  
12  
13  
14  
15  
16  
17  
18  
19  
20  
21  
22  
23  
24  
25  
26  
27  
28  
29  
30  
31  
32  
33  
34  
35  
36  
37  
38  
39  
40  
41  
42  
43  
44  
45  
46  
47  
48  
49

| Cohort Studies (Newcastle Ottawa Scale (12)) |                                              |                                            |                                  |                                                                                 |                                                                    |                              |                                                        |                                         |
|----------------------------------------------|----------------------------------------------|--------------------------------------------|----------------------------------|---------------------------------------------------------------------------------|--------------------------------------------------------------------|------------------------------|--------------------------------------------------------|-----------------------------------------|
| Author                                       | Representatives of the exposed cohort (0, 1) | Selection of the non-exposed cohort (0, 1) | Ascertainment of exposure (0, 1) | Demonstration that outcome of interest was not present at start of study (0, 1) | Comparability of cohorts on the basis of design or analysis (0, 1) | Assessment of outcome (0, 1) | Was follow-up long enough for outcomes to occur (0, 1) | Adequacy of follow-up of cohorts (0, 1) |
| Himes 2008 (29)<br><i>Score: 5/6</i>         | 0                                            | N/A                                        | 1                                | 1                                                                               | N/A                                                                | 1                            | 1                                                      | 1                                       |
| Hsieh 2005 (30)<br><i>Score: 5/6</i>         | 0                                            | N/A                                        | 1                                | 1                                                                               | N/A                                                                | 1                            | 1                                                      | 1                                       |
| Laughon 2014 (31)<br><i>Score: 4/6</i>       | 1                                            | N/A                                        | 0                                | 1                                                                               | N/A                                                                | 0                            | 1                                                      | 1                                       |
| Lykke 2009 (32)<br><i>Score: 4/6</i>         | 1                                            | N/A                                        | 0                                | 1                                                                               | N/A                                                                | 0                            | 1                                                      | 1                                       |
| Manuck 2011 (33)<br><i>Score: 5/6</i>        | 0                                            | N/A                                        | 1                                | 1                                                                               | N/A                                                                | 1                            | 1                                                      | 1                                       |
| Markham 2014 (34)<br><i>Score: 5/6</i>       | 0                                            | N/A                                        | 1                                | 1                                                                               | N/A                                                                | 1                            | 1                                                      | 1                                       |
| Mercer 1999 (36)<br><i>Score: 5/6</i>        | 0                                            | N/A                                        | 1                                | 1                                                                               | N/A                                                                | 1                            | 1                                                      | 1                                       |



| Author                                    | Cohort Studies (Newcastle Ottawa Scale (12)) |                                            |                                  |                                                                                 |                                                                    |                              |                                                        | Adequacy of follow-up of cohorts (0, 1) |
|-------------------------------------------|----------------------------------------------|--------------------------------------------|----------------------------------|---------------------------------------------------------------------------------|--------------------------------------------------------------------|------------------------------|--------------------------------------------------------|-----------------------------------------|
|                                           | Representatives of the exposed cohort (0, 1) | Selection of the non-exposed cohort (0, 1) | Ascertainment of exposure (0, 1) | Demonstration that outcome of interest was not present at start of study (0, 1) | Comparability of cohorts on the basis of design or analysis (0, 1) | Assessment of outcome (0, 1) | Was follow-up long enough for outcomes to occur (0, 1) |                                         |
| Owen 2001 (37)<br><i>Score: 5/6</i>       | 0                                            | N/A                                        | 1                                | 1                                                                               | N/A                                                                | 1                            | 1                                                      | 1                                       |
| Rittenberg 2009 (38)<br><i>Score: 5/6</i> | 0                                            | N/A                                        | 1                                | 1                                                                               | N/A                                                                | 1                            | 1                                                      | 1                                       |
| Turitz 2016 (39)<br><i>Score: 5/6</i>     | 0                                            | N/A                                        | 1                                | 1                                                                               | N/A                                                                | 1                            | 1                                                      | 1                                       |
| Vogel 2007 (41)<br><i>Score: 5/6</i>      | 0                                            | N/A                                        | 1                                | 1                                                                               | N/A                                                                | 1                            | 1                                                      | 1                                       |
| Wallace 2016 (42)<br><i>Score: 4/6</i>    | 1                                            | N/A                                        | 0                                | 1                                                                               | N/A                                                                | 0                            | 1                                                      | 1                                       |
| Yamashita 2015 (43)<br><i>Score: 5/6</i>  | 0                                            | N/A                                        | 1                                | 1                                                                               | N/A                                                                | 1                            | 1                                                      | 1                                       |
| Yang 2016 (44)<br><i>Score: 4/6</i>       | 1                                            | N/A                                        | 0                                | 1                                                                               | N/A                                                                | 0                            | 1                                                      | 1                                       |

1  
2  
3  
4  
5  
6  
7  
8  
9  
10  
11  
12  
13  
14  
15  
16  
17  
18  
19  
20  
21  
22  
23  
24  
25  
26  
27  
28  
29  
30  
31  
32  
33  
34  
35  
36  
37  
38  
39  
40  
41  
42  
43  
44  
45  
46  
47  
48  
49

Table C2 – Quality Scores of Included Randomized Controlled Trials

| <b>Author</b>                            | <b>Randomized Controlled Trials (Jadad Scale (13))</b> |                           |                                          |
|------------------------------------------|--------------------------------------------------------|---------------------------|------------------------------------------|
|                                          | <b>Randomization (0, 1, 2)</b>                         | <b>Blinding (0, 1, 2)</b> | <b>An account of all patients (0, 1)</b> |
| Elimian 2016 (22)<br><i>Score: 2/5</i>   | 2                                                      | 0                         | 0                                        |
| Glover 2011 (25)<br><i>Score: 4/5</i>    | 1                                                      | 2                         | 1                                        |
| Harper 2010 (28)<br><i>Score: 5/5</i>    | 2                                                      | 2                         | 1                                        |
| Meis 2003 (35)<br><i>Score: 5/5</i>      | 2                                                      | 2                         | 1                                        |
| Vermeulen 1999 (40)<br><i>Score: 4/5</i> | 2                                                      | 2                         | 0                                        |

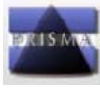

# PRISMA 2009 Checklist

| Section/topic                      | #  | Checklist item                                                                                                                                                                                                                                                                                              | Reported on page # |
|------------------------------------|----|-------------------------------------------------------------------------------------------------------------------------------------------------------------------------------------------------------------------------------------------------------------------------------------------------------------|--------------------|
| <b>TITLE</b>                       |    |                                                                                                                                                                                                                                                                                                             |                    |
| Title                              | 1  | Identify the report as a systematic review, meta-analysis, or both.                                                                                                                                                                                                                                         | 1                  |
| <b>ABSTRACT</b>                    |    |                                                                                                                                                                                                                                                                                                             |                    |
| Structured summary                 | 2  | Provide a structured summary including, as applicable: background; objectives; data sources; study eligibility criteria, participants, and interventions; study appraisal and synthesis methods; results; limitations; conclusions and implications of key findings; systematic review registration number. | 3                  |
| <b>INTRODUCTION</b>                |    |                                                                                                                                                                                                                                                                                                             |                    |
| Rationale                          | 3  | Describe the rationale for the review in the context of what is already known.                                                                                                                                                                                                                              | 5-6                |
| Objectives                         | 4  | Provide an explicit statement of questions being addressed with reference to participants, interventions, comparisons, outcomes, and study design (PICOS).                                                                                                                                                  | 6                  |
| <b>METHODS</b>                     |    |                                                                                                                                                                                                                                                                                                             |                    |
| Protocol and registration          | 5  | Indicate if a review protocol exists, if and where it can be accessed (e.g., Web address), and, if available, provide registration information including registration number.                                                                                                                               | n/a                |
| Eligibility criteria               | 6  | Specify study characteristics (e.g., PICOS, length of follow-up) and report characteristics (e.g., years considered, language, publication status) used as criteria for eligibility, giving rationale.                                                                                                      | 6-8                |
| Information sources                | 7  | Describe all information sources (e.g., databases with dates of coverage, contact with study authors to identify additional studies) in the search and date last searched.                                                                                                                                  | 6                  |
| Search                             | 8  | Present full electronic search strategy for at least one database, including any limits used, such that it could be repeated.                                                                                                                                                                               | Appendix A         |
| Study selection                    | 9  | State the process for selecting studies (i.e., screening, eligibility, included in systematic review, and, if applicable, included in the meta-analysis).                                                                                                                                                   | 7                  |
| Data collection process            | 10 | Describe method of data extraction from reports (e.g., piloted forms, independently, in duplicate) and any processes for obtaining and confirming data from investigators.                                                                                                                                  | 7                  |
| Data items                         | 11 | List and define all variables for which data were sought (e.g., PICOS, funding sources) and any assumptions and simplifications made.                                                                                                                                                                       | 7-8                |
| Risk of bias in individual studies | 12 | Describe methods used for assessing risk of bias of individual studies (including specification of whether this was done at the study or outcome level), and how this information is to be used in any data synthesis.                                                                                      | 7-8                |
| Summary measures                   | 13 | State the principal summary measures (e.g., risk ratio, difference in means).                                                                                                                                                                                                                               | 8                  |
| Synthesis of results               | 14 | Describe the methods of handling data and combining results of studies, if done, including measures of consistency (e.g., $I^2$ ) for each meta-analysis.                                                                                                                                                   | 8                  |

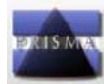

## PRISMA 2009 Checklist

Page 1 of 2

| Section/topic                                                                                                                              | #  | Checklist item                                                                                                                                                                                           | Reported on page #     |
|--------------------------------------------------------------------------------------------------------------------------------------------|----|----------------------------------------------------------------------------------------------------------------------------------------------------------------------------------------------------------|------------------------|
| Risk of bias across studies                                                                                                                | 15 | Specify any assessment of risk of bias that may affect the cumulative evidence (e.g., publication bias, selective reporting within studies).                                                             | 7-8                    |
| Additional analyses                                                                                                                        | 16 | Describe methods of additional analyses (e.g., sensitivity or subgroup analyses, meta-regression), if done, indicating which were pre-specified.                                                         | 8                      |
| <b>RESULTS</b>                                                                                                                             |    |                                                                                                                                                                                                          |                        |
| Study selection                                                                                                                            | 17 | Give numbers of studies screened, assessed for eligibility, and included in the review, with reasons for exclusions at each stage, ideally with a flow diagram.                                          | Figure 1, page 8       |
| Study characteristics                                                                                                                      | 18 | For each study, present characteristics for which data were extracted (e.g., study size, PICOS, follow-up period) and provide the citations.                                                             | Appendix B             |
| Risk of bias within studies                                                                                                                | 19 | Present data on risk of bias of each study and, if available, any outcome level assessment (see item 12).                                                                                                | Appendix C, pages 9-10 |
| Results of individual studies                                                                                                              | 20 | For all outcomes considered (benefits or harms), present, for each study: (a) simple summary data for each intervention group (b) effect estimates and confidence intervals, ideally with a forest plot. | Figures 2, 3, page 8-9 |
| Synthesis of results                                                                                                                       | 21 | Present results of each meta-analysis done, including confidence intervals and measures of consistency.                                                                                                  | Figures 2, 3, page 8-9 |
| Risk of bias across studies                                                                                                                | 22 | Present results of any assessment of risk of bias across studies (see Item 15).                                                                                                                          | Appendix C, pages 9-10 |
| Additional analysis                                                                                                                        | 23 | Give results of additional analyses, if done (e.g., sensitivity or subgroup analyses, meta-regression [see Item 16]).                                                                                    | 9                      |
| <b>DISCUSSION</b>                                                                                                                          |    |                                                                                                                                                                                                          |                        |
| Summary of evidence                                                                                                                        | 24 | Summarize the main findings including the strength of evidence for each main outcome; consider their relevance to key groups (e.g., healthcare providers, users, and policy makers).                     | 10                     |
| Limitations                                                                                                                                | 25 | Discuss limitations at study and outcome level (e.g., risk of bias), and at review-level (e.g., incomplete retrieval of identified research, reporting bias).                                            | 12-13                  |
| Conclusions                                                                                                                                | 26 | Provide a general interpretation of the results in the context of other evidence, and implications for future research.                                                                                  | 13                     |
| <b>FUNDING</b>                                                                                                                             |    |                                                                                                                                                                                                          |                        |
| For peer review only - <a href="http://bmjopen.bmj.com/site/about/guidelines.xhtml">http://bmjopen.bmj.com/site/about/guidelines.xhtml</a> |    |                                                                                                                                                                                                          |                        |

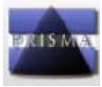

# PRISMA 2009 Checklist

1  
2  
3  
4  
5  
6  
7  
8  
9  
10  
11  
12  
13  
14  
15  
16  
17  
18  
19  
20  
21  
22  
23  
24  
25  
26  
27  
28  
29  
30  
31  
32  
33  
34  
35  
36  
37  
38  
39  
40  
41  
42  
43  
44  
45  
46  
47  
48  
49

|         |    |                                                                                                                                            |   |
|---------|----|--------------------------------------------------------------------------------------------------------------------------------------------|---|
| Funding | 27 | Describe sources of funding for the systematic review and other support (e.g., supply of data); role of funders for the systematic review. | 2 |
|---------|----|--------------------------------------------------------------------------------------------------------------------------------------------|---|

From: Moher D, Liberati A, Tetzlaff J, Altman DG, The PRISMA Group (2009). Preferred Reporting Items for Systematic Reviews and Meta-Analyses: The PRISMA Statement. PLoS Med 6(7): e1000097. doi:10.1371/journal.pmed1000097

For more information, visit: [www.prisma-statement.org](http://www.prisma-statement.org).

Page 2 of 2

For peer review only

# BMJ Open

## Risk of Recurrent Spontaneous Preterm Birth: A Systematic Review and Meta-Analysis

|                                 |                                                                                                                                                                                                   |
|---------------------------------|---------------------------------------------------------------------------------------------------------------------------------------------------------------------------------------------------|
| Journal:                        | <i>BMJ Open</i>                                                                                                                                                                                   |
| Manuscript ID                   | bmjopen-2016-015402.R2                                                                                                                                                                            |
| Article Type:                   | Research                                                                                                                                                                                          |
| Date Submitted by the Author:   | 31-May-2017                                                                                                                                                                                       |
| Complete List of Authors:       | Phillips, Courtney; University of Calgary<br>Velji, Zain; University of Calgary<br>Hanly, Ciara; University of British Columbia<br>Metcalf, Amy; University of Calgary, Obstetrics and Gynecology |
| <b>Primary Subject Heading</b>: | Obstetrics and gynaecology                                                                                                                                                                        |
| Secondary Subject Heading:      | Obstetrics and gynaecology, Epidemiology, Evidence based practice, Paediatrics                                                                                                                    |
| Keywords:                       | EPIDEMIOLOGY, NEONATOLOGY, OBSTETRICS, PAEDIATRICS                                                                                                                                                |
|                                 |                                                                                                                                                                                                   |

SCHOLARONE™  
Manuscripts

Peer Review Only

**Risk of Recurrent Spontaneous Preterm Birth: A Systematic Review and Meta-Analysis**

Ms. Courtney PHILLIPS<sup>1</sup> BSc, Ms. Zain VELJI<sup>2</sup> BSc, Ms. Ciara HANLY<sup>3</sup>, Dr. Amy METCALFE<sup>4,5</sup> PhD

<sup>1</sup>Cumming School of Medicine, University of Calgary, Calgary, Alberta, Canada

<sup>2</sup>Faculty of Nursing, University of Calgary, Calgary, Alberta, Canada

<sup>3</sup>School of Kinesiology, University of British Columbia, Vancouver, British Columbia, Canada

<sup>4</sup>Department of Obstetrics and Gynecology, University of Calgary, Calgary, Alberta, Canada

<sup>5</sup>Department of Community Health Sciences, University of Calgary, Calgary, Alberta, Canada

**Address for Correspondence:**

Amy Metcalfe

Foothills Medical Centre, 4<sup>th</sup> Floor North Tower

1403 29 St NW

Calgary, Alberta, Canada

T2N 2T9

Email: [amy.metcalfe@albertahealthservices.ca](mailto:amy.metcalfe@albertahealthservices.ca)

Phone: 403-944-8458

**Short Title:** Risk of Recurrent Spontaneous Preterm Birth

**Condensation:** The risk of recurrent spontaneous preterm birth is high, and tends to reoccur more frequently following preterm labor than preterm premature rupture of membranes.

**Conflict of Interest:** The authors have no conflicts of interest to report

**Contributorship Statement:** All authors made a substantial contribution to this study. CP, ZV and CH conducted the systematic review. CP drafted the manuscript. AM designed the study and conducted the meta-analysis. All authors critically reviewed the manuscript, interpreted the findings, and approved the final version. All authors had full access to all of the data in the study and can take responsibility for the integrity of the data and the accuracy of the data analysis. As the senior author AM affirms that the manuscript is an honest, accurate, and transparent account of the study being reported, that no important aspects of the study have been omitted, and that any discrepancies from the study as planned have been explained.

**Data Sharing Agreement:** No additional data is available

**Exclusive License:** The Corresponding Author has the right to grant on behalf of all authors and does grant on behalf of all authors, a worldwide license to the Publishers and its licensees in perpetuity, in all forms, formats and media (whether known now or created in the future), to i) publish, reproduce, distribute, display and store the Contribution, ii) translate the Contribution into other languages, create adaptations, reprints, include within collections and create summaries, extracts and/or, abstracts of the Contribution and convert or allow conversion into any format including without limitation audio, iii) create any other derivative work(s) based in whole or part on the on the Contribution, iv) to exploit all subsidiary rights to exploit all subsidiary rights that currently exist or as may exist in the future in the Contribution, v) the

1  
2  
3 inclusion of electronic links from the Contribution to third party material where-ever it may be  
4 located; and, vi) licence any third party to do any or all of the above.  
5  
6

7 **Funding:** This study was funded by the Alberta Children's Hospital Research Institute. Amy  
8 Metcalfe is supported by a New Investigator Award from the Canadian Institutes of Health  
9 Research. The funder had no role in study design, execution, or publication decisions.  
10

11 **Word Count (Abstract):** 236

12 **Word Count (Manuscript):** 2656

13 **Number of References:** 55

14 **Number of Tables:** 0

15 **Number of Figures:** 3

16 **Number of Appendices:** 3  
17  
18  
19  
20  
21  
22  
23  
24  
25  
26  
27  
28  
29  
30  
31  
32  
33  
34  
35  
36  
37  
38  
39  
40  
41  
42  
43  
44  
45  
46  
47  
48  
49  
50  
51  
52  
53  
54  
55  
56  
57  
58  
59  
60



**Abstract**

*Objective:* To determine the risk of recurrent spontaneous preterm birth following spontaneous preterm birth in singleton pregnancies.

*Design:* Systematic review and meta-analysis using random effects models.

*Data Sources:* An electronic literature search was conducted in OVID Medline (1948-2017), Embase (1980-2017), and ClinicalTrials.gov (completed studies effective 2017), supplemented by hand-searching bibliographies of included studies, to find all studies with original data concerning recurrent spontaneous preterm birth.

*Study Eligibility Criteria:* Studies had to include women with at least one spontaneous preterm singleton live birth (<37 weeks) and at least one subsequent pregnancy resulting in a singleton live birth. The Newcastle-Ottawa Scale and Jadad Scale were used to assess the study quality of cohort studies and randomized controlled trials respectively.

*Results:* Overall, 32 articles involving 55,197 women, met all inclusion criteria. Generally studies were well conducted and had a low risk of bias. The absolute risk of recurrent spontaneous preterm birth at <37 weeks gestation was 30.0% (95% CI: 27.0-34.0%). The risk of recurrence due to preterm premature rupture of membranes (PPROM) at <37 weeks gestation was 7.0% (95% CI: 6.0-9.0%), while the risk of recurrence due to preterm labor at <37 weeks gestation was 23.0% (95% CI: 13.0-33.0%).

*Conclusions:* The risk of recurrent spontaneous preterm birth is high and is influenced by the underlying clinical pathway leading to the birth. This information is important for clinicians when discussing the recurrence risk of spontaneous preterm birth with their patients.

**Key Words:** preterm birth, preterm labor, preterm premature rupture of membranes, recurrence, systematic review

**Article Summary – Strengths and Limitations of This Study:**

- 1  
2  
3  
4  
5  
6  
7  
8  
9  
10  
11  
12  
13  
14  
15  
16  
17  
18  
19  
20  
21  
22  
23  
24  
25  
26  
27  
28  
29  
30  
31  
32  
33  
34  
35  
36  
37  
38  
39  
40  
41  
42  
43  
44  
45  
46  
47  
48  
49  
50  
51  
52  
53  
54  
55  
56  
57  
58  
59  
60
- Study strengths include the comprehensive search strategy with no language restrictions used in the nature of the systematic review.
  - Limitations primarily relate to the underlying data that was available on this topic. Most of the included studies were observational in nature. Additionally, many primary studies examining the recurrence risk of preterm birth had to be excluded as they did not clearly differentiate between spontaneous and indicated preterm delivery. There was a high degree of heterogeneity in the studies included in the meta-analysis.

## Introduction

Preterm birth (PTB) is defined as any live birth occurring before 37 completed weeks of gestation; this can be subdivided into extremely preterm (<28 weeks), very preterm (28-<32 weeks), moderately preterm (32-<34 weeks) and late preterm (34-<37 weeks) birth based on the gestational age at delivery (1). This sub-categorization is important as gestational age is inversely associated with increased mortality, morbidity and the intensity of neonatal care required at birth (2). Worldwide, 11.1% of infants are born preterm every year (2). Preterm birth is the leading cause of perinatal morbidity and mortality, and second most common cause of death, after pneumonia, in children under five years of age (3, 4).

Indicated preterm births (iPTB) are those induced for medical reasons, such as pre-eclampsia, intrauterine growth restriction, or fetal distress. However, approximately 70% of PTB occur spontaneously (sPTB) (5). The clinical pathways that lead to sPTB typically include preterm labor (PTL) and preterm premature rupture of membranes (PPROM), although these occur on a spectrum and may co-occur in the same clinical setting. PTL is defined as regular contractions and cervical changes at less than 37 weeks gestation, and PPRM is defined as spontaneous rupture of membranes at least one hour before contractions at less than 37 weeks gestation (5). Known risk factors for spontaneous preterm birth include a previous preterm birth, black race, low maternal body-mass index, comorbidities, a short cervical length and a raised fetal fibronectin concentration (5, 6). Despite knowing these risk factors, our understanding of the etiology behind sPTB is poor and sPTB is considered to be multifactorial in nature (6, 7).

Although sPTB has a tendency to recur, little is known about the recurrence risk (7). This is of concern because sPTB is a leading cause of neonatal morbidity and mortality, and it also has a large economic burden (8). Further, women who have had a previous sPTB are likely to be anxious during their subsequent pregnancies, which itself can lead to sPTB and other adverse

1  
2  
3 pregnancy outcomes (9-11). Therefore, we conducted a systematic review and meta-analysis to  
4  
5 investigate the absolute risk of recurrent sPTB following sPTB in singleton pregnancies. By  
6  
7 better understanding the recurrence risk of sPTB, healthcare workers may be better equipped to  
8  
9 manage patient needs and anxieties, as well as develop and apply preventative treatments.  
10  
11

## 12 13 14 **Methods**

15 Two study authors (ZV and CH) executed a comprehensive literature search of Medline (from  
16  
17 1946 to 2015) and Embase (from 1980 to 2015) to identify publications that contained key terms  
18  
19 related to recurrent sPTB in June 2015. The search was updated in July 2016, and expanded to  
20  
21 included completed studies identified through ClinicalTrials.gov. The search was further updated  
22  
23 in May 2017. PPRM, PTL and related terms were included in the search. For the full search  
24  
25 strategy, please refer to Appendix A. Titles and abstracts of these articles were screened for  
26  
27 relevance to determine which articles were to undergo full-text review. Two independent  
28  
29 reviewers (ZV and CP) jointly assessed the final eligibility of the full-text reviewed articles. We  
30  
31 resolved disagreements in full-text eligibility or data abstraction by involvement of a third party  
32  
33 (AM). The bibliographies of included studies were reviewed to identify additional publications  
34  
35 not found through the database search. A complete summary of the search strategy can be found  
36  
37 in Figure 1. No patients were directly involved in this study. As this study only used published  
38  
39 data, it was exempt from Institutional Review Board approval.  
40  
41  
42  
43  
44  
45

46 All studies with original data concerning recurrent sPTB and  $N \geq 20$  were considered for  
47  
48 inclusion. No language restrictions were used. Conference abstracts were not considered. To be  
49  
50 included, studies had to include women with at least one spontaneous preterm live birth (delivery  
51  
52  $< 37$  weeks of gestation) in their obstetric history and at least one subsequent pregnancy resulting  
53  
54 in a live birth. Only studies looking at singleton pregnancies were included. Animal studies,  
55  
56  
57  
58  
59  
60

1  
2  
3 studies that only included iPTB, studies that combined iPTB and sPTB, and studies on PPRM  
4 or PTL where it was not clear if it resulted in sPTB were excluded. In the case of duplicate data,  
5 the study with the largest sample size was included.  
6  
7  
8  
9

10 The data extraction was completed independently by ZV and CP using a standardized  
11 data extraction form. Data was reviewed by AM prior to analysis to ensure completeness.  
12 Information on the authors, title, publication year, data year, location of study, study design,  
13 definitions of preterm birth, and inclusion and exclusion criteria were all extracted. In addition,  
14 information was extracted on the number of women with spontaneous preterm birth in their  
15 initial pregnancy, whether due to PPRM or PTL, number of women with term births in  
16 subsequent pregnancies, and number of women with preterm births in subsequent pregnancies,  
17 whether due to PPRM, PTL or indicated causes. For studies that reported on total reproductive  
18 history, only data on the first 2 consecutive pregnancies were extracted. The Newcastle-Ottawa  
19 Scale (12) and the Jadad Scale (13) were used to assess study quality of cohort studies and  
20 randomized controlled trials respectively. Given the observational nature of this review, the  
21 quality of randomized controlled trials was additionally assessed using the criteria found in the  
22 Newcastle-Ottawa Scale.  
23  
24  
25  
26  
27  
28  
29  
30  
31  
32  
33  
34  
35  
36  
37  
38  
39

40 The primary outcome measured was the recurrence rate of sPTB at <37 weeks gestation.  
41 Secondary outcomes were recurrence rate of sPTB due to PPRM at <37 weeks (following  
42 sPTB due to PPRM in the index pregnancy), recurrence rate of sPTB due to PTL at <37 weeks  
43 (following sPTB due to PTL in the index pregnancy), the recurrence of sPTB by gestational age,  
44 and occurrence of iPTB at <37 weeks after a previous sPTB.  
45  
46  
47  
48  
49  
50  
51  
52

53 For our analysis, we reported the pooled risk of recurrent preterm birth and  
54 accompanying 95% confidence interval (CIs) for sPTB <37 weeks gestation, by iPTB, by  
55  
56  
57  
58  
59  
60

1  
2  
3 gestational age overall, and for PPRM and PTL. Stratified analysis was used to examine the  
4 recurrence rate of sPTB <37 weeks gestation by study design and quality. An a priori decision  
5 was made to use a random-effects model for all models in anticipation of clinical heterogeneity  
6 between studies. The metaprop command in Stata was used to conduct the analysis and exact  
7 confidence intervals were reported (14). Forest plots were used to graphically represent the data.  
8 Heterogeneity between studies was assessed using  $I^2$ , the Cochrane Q statistic, and  
9 accompanying p-values. All analyses were conducted using Stata SE Version 14 (College  
10 Station, Texas).

## 21 22 23 **Results**

24 The search returned 11,775 articles, of which 118 met criteria for full-text review (Figure 1).  
25  
26 Overall 32 articles met all of the inclusion criteria and were included in the review (15-46). A  
27 summary of all of the studies' data can be found in Appendix B (recurrence risk of sPTB is  
28 located in Table B1 and occurrence risk of iPTB following sPTB is located in Table B2). The  
29 included studies were almost entirely cohort studies, with only five randomized controlled trials  
30 (23, 27, 29, 36, 41). The sample sizes in the studies ranged from 33 to 17,334 women and the  
31 rate of recurrent sPTB at <37 weeks gestation ranged from 15.4% to 85.5%. Many of the studies  
32 had different definitions of sPTB and therefore they could not be combined for meta-analysis.  
33  
34 There were only a sufficient number of studies that defined preterm birth as occurring prior to 37  
35 weeks in both the index and subsequent pregnancy to create pooled estimates.  
36  
37  
38  
39  
40  
41  
42  
43  
44  
45  
46  
47

48 The overall risk of recurrent sPTB at <37 weeks gestation (n=25 studies, 52,070 women)  
49 was 30.0% (95% CI: 27.0-34.0%) with a significant Q (P=0.00) and  $I^2$  of 98.6%, indicating  
50 between-study heterogeneity (Figure 2). The recurrence rate did not significantly differ between  
51 randomized controlled trials (34.0%, 95% CI: 29.0-38.0%; n=5 studies, 1,661 women) and  
52  
53  
54  
55  
56  
57  
58  
59  
60

1  
2  
3 cohort studies (29.0%, 95% CI: 26.0-33.0%, n=20 studies, 50,409 women). The risk of iPTB at  
4  
5 <37 weeks gestation after a previous spontaneous preterm birth (n=6 studies, 18,355 women)  
6  
7 was 5.0% (95% CI: 3.0-7.0%) with an  $I^2$  of 98.0%.  
8  
9

10 Few studies looked specifically at the recurrence of PPRM and PTL resulting in sPTB  
11 in singleton pregnancies following prior PPRM or PTL respectively. However, the identified  
12 risk of recurrent PPRM at <37 weeks gestation (n=4 studies, 3,138 women) was 7.0% (95%  
13 CI: 6.0-9.0%) with an  $I^2$  of 51.0% and the risk of recurrent PTL at <37 weeks gestation (n=3  
14 studies, 2,852 women) was 23.0% (95% CI: 13.0-33.0%) with an  $I^2$  of 97.3% (Figure 3).  
15  
16  
17  
18  
19  
20  
21

22 The majority of the studies were of high quality (Appendix C – cohort studies are located  
23 in Table C1 and randomized controlled trials in Tables C2 and C3). As this study exclusively  
24 examined the recurrence risk of spontaneous preterm birth, two elements of the Newcastle  
25 Ottawa Scale relating to the selection of the unexposed cohort and the comparability of the  
26 exposed and unexposed cohorts were unable to be assessed. Cohort studies typically traded off  
27 between being generalizable to the broader patient population not seen in a tertiary center or  
28 having detailed clinical data available. All cohort studies had a quality score of 4 or 5 out of a  
29 possible 6 points. No statistically significant differences in the recurrence rate of sPTB prior to  
30 37 weeks was observed based on quality score in cohort studies (Score 4: 27.0%, 95% CI: 21.0-  
31 32.0%; Score 5: 31.0%, 95% CI: 26.0-36.0%). All but one randomized controlled trial was  
32 deemed to be high quality (Jahad score  $\geq 4/5$ ) (23). This low-quality trial did report a higher  
33 recurrence risk (41.0%, 95% CI: 33.0-49.0) than the pooled estimated generated from high  
34 quality trials (32.0%, 95% CI: 28.0-37.0); however, as evidenced by the overlapping confidence  
35 intervals, these estimates are not statistically different.  
36  
37  
38  
39  
40  
41  
42  
43  
44  
45  
46  
47  
48  
49  
50  
51  
52  
53  
54  
55  
56  
57  
58  
59  
60

## Discussion

This meta-analysis provides an overview of the overall risk of recurrent spontaneous preterm birth. We found that the absolute risk of recurrent sPTB at less than 37 weeks gestation in pregnancies was 30%; this estimate was consistent across study designs and study quality. Interestingly, the risk of recurrent PTL was found to be 23%, similar to the overall risk of recurrent sPTB. Conversely, if a woman has a sPTB due to PPROM, she is less likely to have recurrent PPROM leading to sPTB, with a risk of only 7%. Thus the clinical pathway that leads to sPTB appears to influence the risk of recurrence.

In a 2014 systematic review by Kazemier et al., they found that the risk of recurrence of preterm birth is influenced by the singleton/twin order in both pregnancies. When they looked at spontaneous preterm singleton births after a previous singleton pregnancy, they found that the risk of recurrence of sPTB was 20.2% (47). In contrast to ours, their search strategy was exceedingly complex and included only cohort studies. Ultimately after abstract review they were left with only six studies that looked at singleton-singleton pregnancies, which could explain the difference in our recurrence risk. Further, our study is novel as we differentiated risk by clinical pathway leading to sPTB, whether PTL or PPROM. Ultimately, we found that while all sPTB tends to recur, the clinical pathway of the first sPTB is important in determining that recurrence risk. Previous studies tend to combine these underlying pathways together, but our results suggest that perhaps they should not be pooled. Some studies also suggest that children born following PPROM have increased mortality (48-50) and worse health outcomes (51) compared to children born after PTL, which further supports the premise that these should be looked at as separate clinical conditions.

However, new evidence suggests that PTB and the underlying pathologies that lead to PTB are not mutually exclusive, thus spontaneous and indicated PTB should perhaps not be



1  
2  
3 considered completely separate phenomena. Basso and Wilcox estimated that mortality due to  
4 immaturity itself was about 51%, whereas underlying pathologies that led to PTB accounted for  
5 approximately half of mortality (52). Similarly, in a recent study by Brown et al., the authors  
6 found that gestational age is on the causal path between biological determinants of preterm birth  
7 and neonatal outcomes (53). Infants who were exposed to both pathological intrauterine  
8 conditions and early delivery had increased risk for poor neonatal outcomes. As such a  
9 pathological intrauterine environment, for instance, one characterized by infection, placental  
10 ischemia and other biological determinants, acts through early delivery to produce poor  
11 outcomes. Ananth et al. found that women with a sPTB were not only likely to experience  
12 recurrent sPTB, but they were also associated with increased risks of having a medically  
13 indicated PTB, and vice versa (7). Prevention of preterm mortality requires more than the  
14 resolution of PTB, but must also address the underlying etiologies.

15  
16  
17  
18  
19  
20  
21  
22  
23  
24  
25  
26  
27  
28  
29  
30  
31  
32 Strengths of our systematic review and meta-analysis include our broad search strategy  
33 with no language restrictions, which resulted in a large sample size of pooled data. Limitations  
34 include the fact that most of the studies were observational cohort studies and thus prone to bias,  
35 and there was significant between-study heterogeneity. This is important as many women  
36 included in this body of literature would have been offered some form of therapy to reduce their  
37 risks of recurrent preterm birth. In a similar vein, we also included participants from both the  
38 treated and control arms of the included randomized controlled trials. With the exception of the  
39 trial lead by Meis et al, which found a statistically significant reduction in the incidence of sPTB  
40 in women treated with progesterone (RR=0.66, 95% CI: 0.54-0.81) (36), the other trials had null  
41 findings. Strategies to prevent preterm birth are varied and evidence of their effectiveness are  
42 mixed (54). Effective strategies to prevent preterm birth can be implemented at the individual  
43  
44  
45  
46  
47  
48  
49  
50  
51  
52  
53  
54  
55  
56  
57  
58  
59  
60

1  
2  
3 level (i.e. progesterone supplementation, cervical cerclage, smoking cessation), the  
4  
5 clinic/hospital level (i.e. hard-stop policies to prevent non-medically indicated late preterm and  
6  
7 early term birth, preterm birth prevention clinics) and the societal level (i.e. smoke-free  
8  
9 legislation to reduce environmental tobacco smoke, legislation regarding single-embryo transfer  
10  
11 during in vitro fertilization) (54). As documentation of specific treatment strategies was not  
12  
13 consistently reported in this body of literature, we were not able to synthesize these results  
14  
15 according to specific types of treatment. While both small and large studies were identified and  
16  
17 included, publication bias cannot be entirely ruled out. While the decision to only include studies  
18  
19 with a minimum sample size of 20 was used to exclude case studies of rare cases that may not be  
20  
21 generalizable, this may have inadvertently resulted in the exclusion of some small case series.  
22  
23  
24  
25  
26  
27 Additionally, we only searched 3 independent sources and reviewed the bibliographies of  
28  
29 included articles, thus articles in journals that were not indexed in either Medline or Embase or  
30  
31 studies that were not registered on clinicaltrials.gov or were not cited by articles that were  
32  
33 ultimately included in this review would not have been identified. We anticipate that the impact  
34  
35 of this would be minimal as a study examining the effectiveness of different databases to identify  
36  
37 studies related to maternal morbidity and mortality concluded that Medline and Embase has the  
38  
39 highest yield in identifying unique studies, and that over 60% of all studies were identified by  
40  
41 multiple sources (55). Although we were able to identify a large number of studies, many of  
42  
43 them used different definitions for preterm birth and most did not identify the clinical pathway to  
44  
45 PTB; as a consequence, these data could not be pooled and not all of the existing evidence could  
46  
47 be summarized in this review.  
48  
49  
50  
51

52  
53 In conclusion, our study reaffirmed that a previous spontaneous preterm birth is a  
54  
55 significant risk factor for recurrence in subsequent pregnancies, placing that risk at 30%.  
56  
57  
58  
59  
60

1  
2  
3 However, substantial heterogeneity in underlying studies speaks to the need for common  
4 definitions and further work in this area. Additionally, the absolute risk of recurrence appears to  
5 be substantially higher if the underlying etiology is PTL as opposed to PPROM. Clinically, this  
6 information will help with risk stratification and patient counseling. Interventions to prevent PTB  
7 need to be focused and designed for specific clinical conditions. Further studies need to be done  
8 that look at the efficacy of preventative treatments in the prevention of PTL and PPROM.  
9  
10 Knowledge of the etiology of previous sPTB may help identify women at increased risk of sPTB  
11 for participation in future clinical trials.  
12  
13  
14  
15  
16  
17  
18  
19  
20  
21  
22  
23  
24  
25  
26  
27  
28  
29  
30  
31  
32  
33  
34  
35  
36  
37  
38  
39  
40  
41  
42  
43  
44  
45  
46  
47  
48  
49  
50  
51  
52  
53  
54  
55  
56  
57  
58  
59  
60

## References

1. March of Dimes, PMNCH, Save the Children, WHO. The global action report on preterm birth. Geneva: World Health Organization; 2012.
2. Blencowe H, Cousens S, Oestergaard MZ, Chou D, Moller AB, Narwal R, et al. National, regional, and worldwide estimates of preterm birth rates in the year 2010 with time trends since 1990 for selected countries: a systematic analysis and implications. *Lancet*. 2012;379(9832):2162-72.
3. Lawn JE, Cousens S, Zupan J, Lancet Neonatal Survival Steering T. 4 million neonatal deaths: when? Where? Why? *Lancet*. 2005;365(9462):891-900.
4. Liu L, Johnson HL, Cousens S, Perin J, Scott S, Lawn JE, et al. Global, regional, and national causes of child mortality: an updated systematic analysis for 2010 with time trends since 2000. *Lancet*. 2012;379(9832):2151-61.
5. Goldenberg RL, Culhane JF, Iams JD, Romero R. Epidemiology and causes of preterm birth. *Lancet*. 2008;371(9606):75-84.
6. Mazaki-Tovi S, Romero R, Kusanovic JP, Erez O, Pineles BL, Gotsch F, et al. Recurrent preterm birth. *Semin Perinatol*. 2007;31(3):142-58.
7. Ananth CV, Vintzileos AM. Epidemiology of preterm birth and its clinical subtypes. *J Matern Fetal Neonatal Med*. 2006;19(12):773-82.
8. Lim G, Tracey J, Boom N, Karmakar S, Wang J, Berthelot JM, et al. CIHI survey: Hospital costs for preterm and small-for-gestational age babies in Canada. *Healthc Q*. 2009;12(4):20-4.
9. McDonald SW, Kingston D, Bayrampour H, Dolan SM, Tough SC. Cumulative psychosocial stress, coping resources, and preterm birth. *Arch Womens Ment Health*. 2014;17(6):559-68.
10. Shapiro GD, Fraser WD, Frasca MG, Seguin JR. Psychosocial stress in pregnancy and preterm birth: associations and mechanisms. *J Perinat Med*. 2013;41(6):631-45.
11. Loomans EM, van Dijk AE, Vrijkotte TG, van Eijsden M, Stronks K, Gemke RJ, et al. Psychosocial stress during pregnancy is related to adverse birth outcomes: results from a large multi-ethnic community-based birth cohort. *Eur J Public Health*. 2013;23(3):485-91.
12. Wells G, Shea B, O'Connell D, Peterson J, Welch V, Losos M, et al. The Newcastle-Ottawa Scale (NOS) for assessing the quality of nonrandomized studies in meta-analysis Ottawa: Ottawa Hospital Research Institute; 2014 [Available from: [http://www.ohri.ca/programs/clinical\\_epidemiology/oxford.asp](http://www.ohri.ca/programs/clinical_epidemiology/oxford.asp)].
13. Jadad AR, Moore RA, Carroll D, Jenkinson C, Reynolds DJ, Gavaghan DJ, et al. Assessing the quality of reports of randomized clinical trials: is blinding necessary? *Control Clin Trials*. 1996;17(1):1-12.
14. Nyaga VN, Arbyn M, Aerts M. Metaprop: a Stata command to perform meta-analysis of binomial data. *Arch Public Health*. 2014;72(1):39.
15. Ananth CV, Getahun D, Peltier MR, Salihu HM, Vintzileos AM. Recurrence of spontaneous versus medically indicated preterm birth. *Am J Obstet Gynecol*. 2006;195(3):643-50.
16. Asrat T, Lewis DF, Garite TJ, Major CA, Nageotte MP, Towers CV, et al. Rate of recurrence of preterm premature rupture of membranes in consecutive pregnancies. *Am J Obstet Gynecol*. 1991;165(4 Pt 1):1111-5.

17. Care AG, Sharp AN, Lane S, Roberts D, Watkins L, Alfirevic Z. Predicting preterm birth in women with previous preterm birth and cervical length  $\geq 25$  mm. *Ultrasound Obstet Gynecol.* 2014;43(6):681-6.
18. Carr-Hill RA, Hall MH. The repetition of spontaneous preterm labour. *Br J Obstet Gynaecol.* 1985;92(9):921-8.
19. Coleman S, Wallace L, Alexander J, Istwan N. Recurrent preterm birth in women treated with 17 alpha-hydroxyprogesterone caproate: the contribution of risk factors in the penultimate pregnancy. *J Matern Fetal Neonatal Med.* 2012;25(7):1034-8.
20. Crane JM, Hutchens D. Use of transvaginal ultrasonography to predict preterm birth in women with a history of preterm birth. *Ultrasound Obstet Gynecol.* 2008;32(5):640-5.
21. Drassinower D, Obican SG, Siddiq Z, Heller D, Gyamfi-Bannerman C, Friedman AM. Does the clinical presentation of a prior preterm birth predict risk in a subsequent pregnancy? *Am J Obstet Gynecol.* 2015;213(5):686 e1-7.
22. Ekwo E, Moawad A. The risk for recurrence of premature births to African-American and white women. *J Assoc Acad Minor Phys.* 1998;9(1):16-21.
23. Elimian A, Smith K, Williams M, Knudtson E, Goodman JR, Escobedo MB. A randomized controlled trial of intramuscular versus vaginal progesterone for the prevention of recurrent preterm birth. *Int J Gynaecol Obstet.* 2016;134(2):169-72.
24. Esplin MS, O'Brien E, Fraser A, Kerber RA, Clark E, Simonsen SE, et al. Estimating recurrence of spontaneous preterm delivery. *Obstet Gynecol.* 2008;112(3):516-23.
25. Getahun D, Strickland D, Ananth CV, Fassett MJ, Sacks DA, Kirby RS, et al. Recurrence of preterm premature rupture of membranes in relation to interval between pregnancies. *Am J Obstet Gynecol.* 2010;202(6):570 e1-6.
26. Glover MM, McKenna DS, Downing CM, Smith DB, Croom CS, Sonek JD. A randomized trial of micronized progesterone for the prevention of recurrent preterm birth. *Am J Perinatol.* 2011;28(5):377-81.
27. Goldenberg RL, Andrews WW, Faye-Petersen O, Cliver S, Goepfert AR, Hauth JC. The Alabama Preterm Birth Project: placental histology in recurrent spontaneous and indicated preterm birth. *Am J Obstet Gynecol.* 2006;195(3):792-6.
28. Gonzalez-Quintero VH, Cordova YC, Istwan NB, Tudela F, Rhea DJ, Romary LM, et al. Influence of gestational age and reason for prior preterm birth on rates of recurrent preterm delivery. *Am J Obstet Gynecol.* 2011;205(3):275 e1-5.
29. Harper M, Thom E, Klebanoff MA, Thorp J, Jr., Sorokin Y, Varner MW, et al. Omega-3 fatty acid supplementation to prevent recurrent preterm birth: a randomized controlled trial. *Obstet Gynecol.* 2010;115(2 Pt 1):234-42.
30. Himes KP, Simhan HN. Risk of recurrent preterm birth and placental pathology. *Obstet Gynecol.* 2008;112(1):121-6.
31. Hsieh TT, Chen SF, Shau WY, Hsieh CC, Hsu JJ, Hung TH. The impact of interpregnancy interval and previous preterm birth on the subsequent risk of preterm birth. *J Soc Gynecol Investig.* 2005;12(3):202-7.
32. Laughon SK, Albert PS, Leishear K, Mendola P. The NICHD Consecutive Pregnancies Study: recurrent preterm delivery by subtype. *Am J Obstet Gynecol.* 2014;210(2):131 e1-8.
33. Lykke JA, Paidas MJ, Langhoff-Roos J. Recurring complications in second pregnancy. *Obstet Gynecol.* 2009;113(6):1217-24.

- 1  
2  
3  
4  
5  
6  
7  
8  
9  
10  
11  
12  
13  
14  
15  
16  
17  
18  
19  
20  
21  
22  
23  
24  
25  
26  
27  
28  
29  
30  
31  
32  
33  
34  
35  
36  
37  
38  
39  
40  
41  
42  
43  
44  
45  
46  
47  
48  
49  
50  
51  
52  
53  
54  
55  
56  
57  
58  
59  
60
34. Manuck TA, Henry E, Gibson J, Varner MW, Porter TF, Jackson GM, et al. Pregnancy outcomes in a recurrent preterm birth prevention clinic. *Am J Obstet Gynecol.* 2011;204(4):320 e1-6.
  35. Markham KB, Walker H, Lynch CD, Iams JD. Preterm birth rates in a prematurity prevention clinic after adoption of progestin prophylaxis. *Obstet Gynecol.* 2014;123(1):34-9.
  36. Meis PJ, Klebanoff M, Thom E, Dombrowski MP, Sibai B, Moawad AH, et al. Prevention of recurrent preterm delivery by 17 alpha-hydroxyprogesterone caproate. *N Engl J Med.* 2003;348(24):2379-85.
  37. Mercer BM, Goldenberg RL, Moawad AH, Meis PJ, Iams JD, Das AF, et al. The preterm prediction study: effect of gestational age and cause of preterm birth on subsequent obstetric outcome. National Institute of Child Health and Human Development Maternal-Fetal Medicine Units Network. *Am J Obstet Gynecol.* 1999;181(5 Pt 1):1216-21.
  38. Owen J, Yost N, Berghella V, Thom E, Swain M, Dildy GA, 3rd, et al. Mid-trimester endovaginal sonography in women at high risk for spontaneous preterm birth. *JAMA.* 2001;286(11):1340-8.
  39. Rittenberg C, Newman RB, Istwan NB, Rhea DJ, Stanziano GJ. Preterm birth prevention by 17 alpha-hydroxyprogesterone caproate vs. daily nursing surveillance. *J Reprod Med.* 2009;54(2):47-52.
  40. Turitz AL, Bastek JA, Purisch SE, Elovitz MA, Levine LD. Patient characteristics associated with 17-alpha hydroxyprogesterone caproate use among a high-risk cohort. *Am J Obstet Gynecol.* 2016;214(4):536 e1-5.
  41. Vermeulen GM, Bruinse HW. Prophylactic administration of clindamycin 2% vaginal cream to reduce the incidence of spontaneous preterm birth in women with an increased recurrence risk: a randomised placebo-controlled double-blind trial. *Br J Obstet Gynaecol.* 1999;106(7):652-7.
  42. Vogel I, Goepfert AR, Thorsen P, Skogstrand K, Hougaard DM, Curry AH, et al. Early second-trimester inflammatory markers and short cervical length and the risk of recurrent preterm birth. *J Reprod Immunol.* 2007;75(2):133-40.
  43. Wallace JM, Bhattacharya S, Campbell DM, Horgan GW. Inter-Pregnancy Weight Change and the Risk of Recurrent Pregnancy Complications. *PLoS One.* 2016;11(5):e0154812.
  44. Yamashita M, Hayashi S, Endo M, Okuno K, Fukui O, Mimura K, et al. Incidence and risk factors for recurrent spontaneous preterm birth: A retrospective cohort study in Japan. *J Obstet Gynaecol Res.* 2015;41(11):1708-14.
  45. Yang J, Baer RJ, Berghella V, Chambers C, Chung P, Coker T, et al. Recurrence of Preterm Birth and Early Term Birth. *Obstet Gynecol.* 2016;128(2):364-72.
  46. Uquillas KR, Fox NS, Rebarber A, Saltzman DH, Klauser CK, Roman AS. A comparison of cervical length measurement techniques for the prediction of spontaneous preterm birth. *J Matern Fetal Neonatal Med.* 2017;30(1):50-3.
  47. Kazemier BM, Buijs PE, Mignini L, Limpens J, de Groot CJ, Mol BW, et al. Impact of obstetric history on the risk of spontaneous preterm birth in singleton and multiple pregnancies: a systematic review. *BJOG.* 2014;121(10):1197-209.
  48. Kamath-Rayne BD, DeFranco EA, Chung E, Chen A. Subtypes of preterm birth and the risk of postneonatal death. *J Pediatr.* 2013;162(1):28-34 e2.
  49. Villar J, Abalos E, Carroli G, Giordano D, Wojdyla D, Piaggio G, et al. Heterogeneity of perinatal outcomes in the preterm delivery syndrome. *Obstet Gynecol.* 2004;104(1):78-87.

- 1
- 2
- 3
- 4 50. Chen A, Feresu SA, Barsoom MJ. Heterogeneity of preterm birth subtypes in relation to neonatal death. *Obstet Gynecol.* 2009;114(3):516-22.
- 5
- 6 51. Newman DE, Paamoni-Keren O, Press F, Wiznitzer A, Mazor M, Sheiner E. Neonatal outcome in preterm deliveries between 23 and 27 weeks' gestation with and without preterm premature rupture of membranes. *Arch Gynecol Obstet.* 2009;280(1):7-11.
- 7
- 8 52. Basso O, Wilcox A. Mortality risk among preterm babies: immaturity versus underlying pathology. *Epidemiology.* 2010;21(4):521-7.
- 9
- 10 53. Brown HK, Speechley KN, Macnab J, Natale R, Campbell MK. Neonatal morbidity associated with late preterm and early term birth: the roles of gestational age and biological determinants of preterm birth. *Int J Epidemiol.* 2014;43(3):802-14.
- 11
- 12 54. Newnham JP, Dickinson JE, Hart RJ, Pennell CE, Arrese CA, Keelan JA. Strategies to prevent preterm birth. *Front Immunol.* 2014;5:584.
- 13
- 14 55. Betran AP, Say L, Gulmezoglu AM, Allen T, Hampson L. Effectiveness of different databases in identifying studies for systematic reviews: experience from the WHO systematic review of maternal morbidity and mortality. *BMC Med Res Methodol.* 2005;5(1):6.
- 15
- 16
- 17
- 18
- 19
- 20
- 21
- 22
- 23
- 24
- 25
- 26
- 27
- 28
- 29
- 30
- 31
- 32
- 33
- 34
- 35
- 36
- 37
- 38
- 39
- 40
- 41
- 42
- 43
- 44
- 45
- 46
- 47
- 48
- 49
- 50
- 51
- 52
- 53
- 54
- 55
- 56
- 57
- 58
- 59
- 60

1  
2  
3 Figure 1: Flow diagram of included studies  
4

5  
6 Figure 2. Forest plot of the rate of recurrent spontaneous preterm birth at <37 weeks gestation  
7

8 Figure 3. Forest plots of the rate of (a) recurrent PPROM and (b) recurrent PTL at <37 weeks  
9 gestation  
10  
11  
12  
13  
14  
15  
16  
17  
18  
19  
20  
21  
22  
23  
24  
25  
26  
27  
28  
29  
30  
31  
32  
33  
34  
35  
36  
37  
38  
39  
40  
41  
42  
43  
44  
45  
46  
47  
48  
49  
50  
51  
52  
53  
54  
55  
56  
57  
58  
59  
60

For peer review only



1  
2  
3  
4  
5  
6  
7  
8  
9  
10  
11  
12  
13  
14  
15  
16  
17  
18  
19  
20  
21  
22  
23  
24  
25  
26  
27  
28  
29  
30  
31  
32  
33  
34  
35  
36  
37  
38  
39  
40  
41  
42  
43  
44  
45  
46  
47  
48  
49  
50  
51  
52  
53  
54  
55  
56  
57  
58  
59  
60

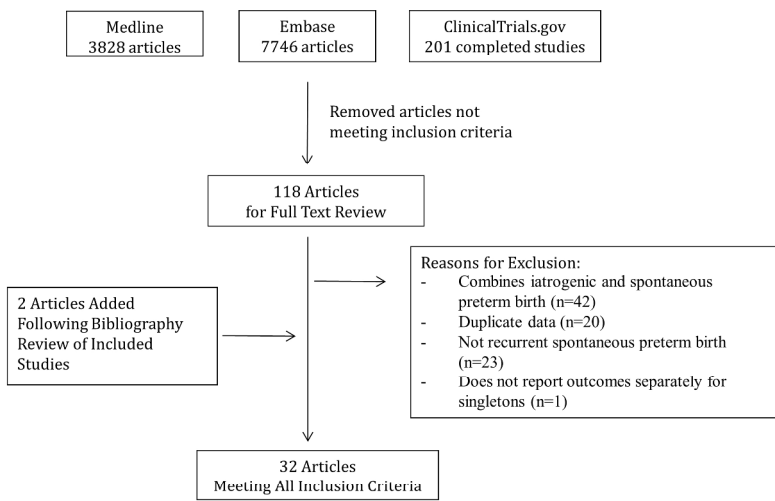

Figure 1: Flow diagram of included studies

254x190mm (300 x 300 DPI)

ew only

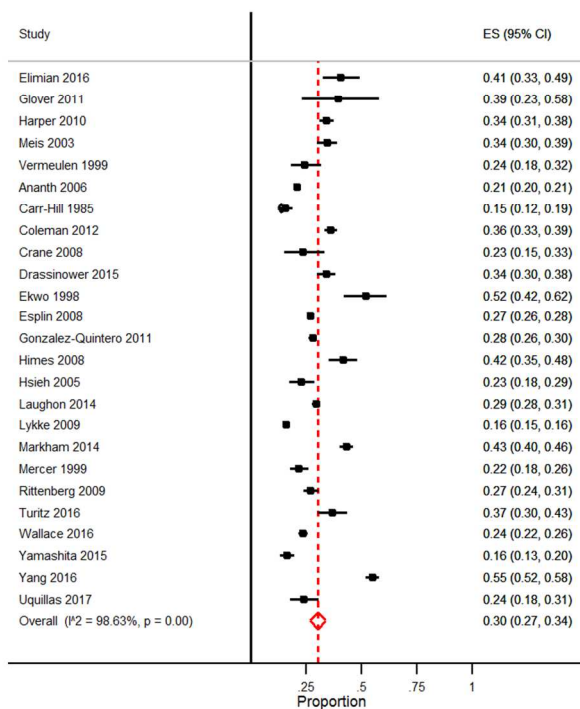

Figure 2. Forest plot of the rate of recurrent spontaneous preterm birth at <37 weeks gestation

254x190mm (300 x 300 DPI)

ew only

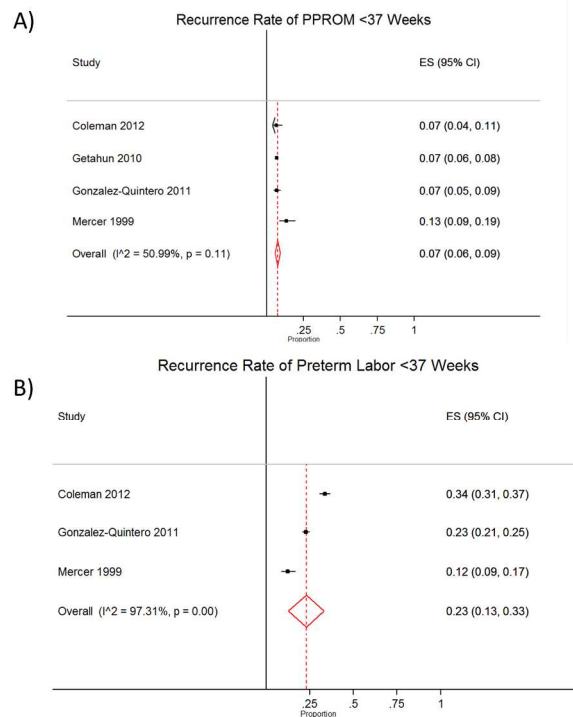

Figure 3. Forest plots of the rate of (a) recurrent PPROM and (b) recurrent PTL at <37 weeks gestation

254x190mm (300 x 300 DPI)

1  
2  
3 Appendix A. Search Strategy  
4  
5  
6

7 Search Strategy:

- 8 1. Premature Birth
- 9 2. ((preterm or pre-term or premature or pre-mature) and (birth\* or childbirth\* or deliver\*  
10 or parturit\*))
- 11 3. Fetal Membranes, Premature Rupture
- 12 4. pprom
- 13 5. Obstetric Labor, Premature
- 14 6. ((preterm or pre-term or premature or pre-mature) and (labor or labour))
- 15 7. Recurrence
- 16 8. recur\* or repeat
- 17 9. (1 or 2 or 3 or 4 or 5 or 6) and (7 or 8)
- 18  
19  
20  
21

22 Initial Search Run on June 17, 2015

23 Updated Search Run on July 29, 2016

24 Updated Search Run on May 24, 2017  
25  
26  
27  
28  
29  
30  
31  
32  
33  
34  
35  
36  
37  
38  
39  
40  
41  
42  
43  
44  
45  
46  
47  
48  
49  
50  
51  
52  
53  
54  
55  
56  
57  
58  
59  
60

1  
2  
3  
4  
5  
6  
7  
8  
9  
10  
11  
12  
13  
14  
15  
16  
17  
18  
19  
20  
21  
22  
23  
24  
25  
26  
27  
28  
29  
30  
31  
32  
33  
34  
35  
36  
37  
38  
39  
40  
41  
42  
43  
44  
45  
46  
47  
48  
49

Appendix B. Included studies

Table B1 – Recurrence rate of spontaneous preterm birth

| Author              | Time Period | Country | Study Design | Inclusion/Exclusion Criteria                                                                                                                                                                                                                                            | Gestational Age at Spontaneous Preterm Birth (weeks) |             | Recurrence Rate of Spontaneous Preterm Birth |
|---------------------|-------------|---------|--------------|-------------------------------------------------------------------------------------------------------------------------------------------------------------------------------------------------------------------------------------------------------------------------|------------------------------------------------------|-------------|----------------------------------------------|
|                     |             |         |              |                                                                                                                                                                                                                                                                         | Pregnancy 1                                          | Pregnancy 2 |                                              |
| Ananth 2006 (15)    | 1989-1997   | USA     | Cohort       | <i>Inclusion:</i> Prior sPTB<br><i>Exclusion:</i> Multiple gestation pregnancies                                                                                                                                                                                        | <37                                                  | <37         | 2,626/12,670 (20.7%)                         |
|                     |             |         |              |                                                                                                                                                                                                                                                                         |                                                      | <35         | 698/12,670 (5.5%)                            |
|                     |             |         |              |                                                                                                                                                                                                                                                                         |                                                      | <32         | 164/12,670 (1.3%)                            |
|                     |             |         |              |                                                                                                                                                                                                                                                                         | <35                                                  | <35         | 698/4,463 (15.6%)                            |
|                     |             |         |              |                                                                                                                                                                                                                                                                         | <32                                                  | <32         | 164/2,022 (8.1%)                             |
| Asrat 1991 (16)     |             | USA     | Cohort       | <i>Inclusion:</i> Prior PPRM<br><i>Exclusion:</i> Incompetent cervix, uterine anomalies, diethylstilbestrol exposure, multiple gestations, and neonates with congenital anomalies                                                                                       | <36                                                  | <36         | 39/121 (32.2%)                               |
| Care 2014 (17)      | 2010-2012   | UK      | Cohort       | <i>Inclusion:</i> Prior sPTB or PROM; cervical length >25mm at 20-24 weeks<br><i>Exclusion:</i> Prior cervical surgery, non-viable pregnancy, history of iPTB, cerclage, uterine anomalies, Ehlers-Danlos syndrome, intrauterine death, twins, congenital abnormalities | <34                                                  | <37         | 53/196 (27.0%)                               |
|                     |             |         |              |                                                                                                                                                                                                                                                                         |                                                      | <34         | 32/196 (16.3%)                               |
| Carr-Hill 1985 (18) | unspecified | UK      | Cohort       | <i>Inclusion:</i> Prior sPTB, singleton<br><i>Exclusion:</i> Multiple gestation, stillbirth, induced labor                                                                                                                                                              | <37                                                  | <37         | 76/494 (15.4%)                               |

| Author                | Time Period | Country | Study Design | Inclusion/Exclusion Criteria                                                                                                                                                                                                                                                                                               | Gestational Age at Spontaneous Preterm Birth (weeks) |             | Recurrence Rate of Spontaneous Preterm Birth |
|-----------------------|-------------|---------|--------------|----------------------------------------------------------------------------------------------------------------------------------------------------------------------------------------------------------------------------------------------------------------------------------------------------------------------------|------------------------------------------------------|-------------|----------------------------------------------|
|                       |             |         |              |                                                                                                                                                                                                                                                                                                                            | Pregnancy 1                                          | Pregnancy 2 |                                              |
| Coleman 2012 (19)     | 2007-2010   | USA     | Cohort       | <i>Inclusion:</i> Prior sPTB, received 17P injections<br><i>Exclusion:</i> Non-compliance with 17P injections                                                                                                                                                                                                              | <37                                                  | <37         | 426/1,183 (36.0%)                            |
|                       |             |         |              |                                                                                                                                                                                                                                                                                                                            |                                                      | <35         | 156/1,183 (13.2%)                            |
|                       |             |         |              |                                                                                                                                                                                                                                                                                                                            |                                                      | <32         | 61/1,183 (5.2%)                              |
| Crane 2008 (20)       | 2000-2006   | Canada  | Cohort       | <i>Inclusion:</i> Prior sPTB<br><i>Exclusion:</i> Cervical cerclage                                                                                                                                                                                                                                                        | <37                                                  | <37         | 21/90 (23.3%)                                |
|                       |             |         |              |                                                                                                                                                                                                                                                                                                                            |                                                      | <35         | 11/90 (12.2%)                                |
|                       |             |         |              |                                                                                                                                                                                                                                                                                                                            |                                                      | <34         | 8/90 (8.9%)                                  |
| Drassinower 2015 (21) | 2009-2014   | USA     | Cohort       | <i>Inclusion:</i> Prior sPTB, singleton<br><i>Exclusion:</i> Multiple gestations, major fetal anomalies, cerclage, history of iPTB or placental abruption                                                                                                                                                                  | <37                                                  | <37         | 178/522 (34.1%)                              |
|                       |             |         |              |                                                                                                                                                                                                                                                                                                                            |                                                      | <34         | 78/522 (14.9%)                               |
|                       |             |         |              |                                                                                                                                                                                                                                                                                                                            |                                                      | <28         | 34/522 (6.5%)                                |
| Ekwo 1998 (22)        | 1988-1993   | USA     | Cohort       | <i>Inclusion:</i> Prior sPTB<br><i>Exclusion:</i> Fetal loss, multiple gestation                                                                                                                                                                                                                                           | <37                                                  | <37         | 56/108 (51.9%)                               |
| Elimian 2016 (23)     | 2007-2010   | USA     | RCT          | <i>Inclusion:</i> Prior sPTB<br><i>Exclusion:</i> Multiple gestation, major fetal anomaly or chromosomal anomalies, prior progesterone use in the current pregnancy, use of heparin in the current pregnancy, uterine anomaly, maternal medical conditions, no ultrasound before 20 <sup>+6</sup> in the current pregnancy | <37                                                  | <37         | 59/145 (40.7%)                               |
|                       |             |         |              |                                                                                                                                                                                                                                                                                                                            |                                                      | <34         | 27/145 (18.6%)                               |
|                       |             |         |              |                                                                                                                                                                                                                                                                                                                            |                                                      | <28         | 15/145 (10.3%)                               |
| Esplin 2008 (24)      | 1989-2001   | USA     | Cohort       | <i>Inclusion:</i> First live birth in Utah and a subsequent live birth in the study period                                                                                                                                                                                                                                 | <37                                                  | <37         | 1663/6,199 (26.8%)                           |
|                       |             |         |              |                                                                                                                                                                                                                                                                                                                            |                                                      | <34         | 587/1,669 (35.2%)                            |

1  
2  
3  
4  
5  
6  
7  
8  
9  
10  
11  
12  
13  
14  
15  
16  
17  
18  
19  
20  
21  
22  
23  
24  
25  
26  
27  
28  
29  
30  
31  
32  
33  
34  
35  
36  
37  
38  
39  
40  
41  
42  
43  
44  
45  
46  
47  
48  
49

| Author                           | Time Period | Country | Study Design | Inclusion/Exclusion Criteria                                                                                                                    | Gestational Age at Spontaneous Preterm Birth (weeks) |             | Recurrence Rate of Spontaneous Preterm Birth |
|----------------------------------|-------------|---------|--------------|-------------------------------------------------------------------------------------------------------------------------------------------------|------------------------------------------------------|-------------|----------------------------------------------|
|                                  |             |         |              |                                                                                                                                                 | Pregnancy 1                                          | Pregnancy 2 |                                              |
|                                  |             |         |              |                                                                                                                                                 |                                                      | <34         | 299/1,669 (17.9%)                            |
| Getahun 2010 (25)<br>*PPROM only | 1989-1997   | USA     | Cohort       | <i>Inclusion:</i> Prior PPRM<br><i>Exclusion:</i> Multiple gestations, births <20 weeks, non White or Black race, >1 pregnancy before 1989      | <37                                                  | <37         | 157/2,259 (6.9%)                             |
|                                  |             |         |              |                                                                                                                                                 | <34                                                  | <34         | 97/1,071 (9.1%)                              |
|                                  |             |         |              |                                                                                                                                                 | <32                                                  | <32         | 67/697 (9.6%)                                |
|                                  |             |         |              |                                                                                                                                                 | <28                                                  | <28         | 22/323 (6.8%)                                |
| Glover 2011 (26)                 | 2006-2009   | USA     | RCT          | <i>Inclusion:</i> Prior sPTB, initiated prenatal care prior to 20 weeks gestation<br><i>Exclusion:</i> Multiple gestations, major fetal anomaly | <37                                                  | <37         | 13/33 (39.4%)                                |
| Goldenberg 2006 (27)             | 1996-2001   | USA     | Cohort       | <i>Inclusion:</i> Prior sPTB                                                                                                                    | <32                                                  | <37         | 71/83 (85.5%)                                |
| Gonzalez-Quintero 2011 (28)      | 2006-2009   | USA     | Cohort       | <i>Inclusion:</i> Prior sPTB, singleton<br><i>Exclusion:</i> iPTB, >1 prior PTB, cerclage in current pregnancy                                  | <37                                                  | <37         | 597/2,123 (28.1%)                            |
|                                  |             |         |              |                                                                                                                                                 |                                                      | <35         | 274/2,123 (12.9%)                            |
|                                  |             |         |              |                                                                                                                                                 |                                                      | <32         | 113/2,123 (5.3%)                             |

| Author            | Time Period | Country | Study Design | Inclusion/Exclusion Criteria                                                                                                                                                                                                                                                                                                                                                                                                                                            | Gestational Age at Spontaneous Preterm Birth (weeks) |             | Recurrence Rate of Spontaneous Preterm Birth |
|-------------------|-------------|---------|--------------|-------------------------------------------------------------------------------------------------------------------------------------------------------------------------------------------------------------------------------------------------------------------------------------------------------------------------------------------------------------------------------------------------------------------------------------------------------------------------|------------------------------------------------------|-------------|----------------------------------------------|
|                   |             |         |              |                                                                                                                                                                                                                                                                                                                                                                                                                                                                         | Pregnancy 1                                          | Pregnancy 2 |                                              |
| Harper 2010 (29)  | 2005-2006   | USA     | RCT          | <i>Inclusion:</i> Prior sPTB, singleton<br><i>Exclusion:</i> Major fetal anomaly, intake of a fish oil supplement >500mg/week at any time during the preceding month, allergy to fish, anticoagulation therapy, hypertension, White's classification D or higher diabetes, drug or alcohol abuse, seizure disorder, uncontrolled thyroid disease, clotting disorder, current or planned cerclage, or a plan to deliver either elsewhere or before 37 weeks of gestation | <37                                                  | <37         | 292/852 (34.3%)                              |
| Himes 2008 (30)   | 2001-2006   | USA     | Cohort       | <i>Inclusion:</i> Prior sPTB placenta pathology information available                                                                                                                                                                                                                                                                                                                                                                                                   | <37                                                  | <37         | 102/245 (41.6%)                              |
| Hsieh 2005 (31)   | 1991-1997   | Taiwan  | Cohort       | <i>Exclusion:</i> Multiple gestation, fetal anomaly, cervical incompetence, stillbirth, iPTB                                                                                                                                                                                                                                                                                                                                                                            | <37                                                  | <37         | 52/228 (22.8%)                               |
| Laughon 2014 (32) | 2002-2010   | USA     | Cohort       | <i>Inclusion:</i> Singleton pregnancies                                                                                                                                                                                                                                                                                                                                                                                                                                 | <37                                                  | <37         | 921/3,139 (29.3%)                            |
| Lykke 2009 (33)   | 1978-2007   | Denmark | Cohort       | <i>Inclusion:</i> Maternal age between 15-50<br><i>Exclusion:</i> Women with cardiovascular disease, type 1 or 2 diabetes, women who emigrated within 3 months of 2nd delivery                                                                                                                                                                                                                                                                                          | <37                                                  | <37         | 2742/17,334 (15.8%)                          |
|                   |             |         |              |                                                                                                                                                                                                                                                                                                                                                                                                                                                                         | <33                                                  |             | 444/1,734 (25.6%)                            |
|                   |             |         |              |                                                                                                                                                                                                                                                                                                                                                                                                                                                                         | <28                                                  |             | 139/535 (26.0%)                              |



| Author            | Time Period | Country | Study Design | Inclusion/Exclusion Criteria                                                                                                                                                                                                                                                    | Gestational Age at Spontaneous Preterm Birth (weeks) |             | Recurrence Rate of Spontaneous Preterm Birth |
|-------------------|-------------|---------|--------------|---------------------------------------------------------------------------------------------------------------------------------------------------------------------------------------------------------------------------------------------------------------------------------|------------------------------------------------------|-------------|----------------------------------------------|
|                   |             |         |              |                                                                                                                                                                                                                                                                                 | Pregnancy 1                                          | Pregnancy 2 |                                              |
| Manuck 2011 (34)  | 2002-2010   | USA     | Cohort       | <i>Inclusion:</i> Prior sPTB, singleton<br><i>Exclusion:</i> History of iPTB or incompetent cervix                                                                                                                                                                              | <35                                                  | <37         | 131/223 (58.7%)                              |
|                   |             |         |              |                                                                                                                                                                                                                                                                                 |                                                      | <32         | 25/223 (11.2%)                               |
| Markham 2014 (35) | 1998-2012   | USA     | Cohort       | <i>Inclusion:</i> Prior sPTB<br><i>Exclusion:</i> Multiple gestations, known uterine anomalies,                                                                                                                                                                                 | <37                                                  | <37         | 459/1,066 (43.1%)                            |
|                   |             |         |              |                                                                                                                                                                                                                                                                                 |                                                      | <35         | 269/1,066 (25.2%)                            |
|                   |             |         |              |                                                                                                                                                                                                                                                                                 |                                                      | <32         | 139/1,066 (13.0%)                            |
| Meis 2003 (36)    | 1999-2002   | USA     | RCT          | <i>Inclusion:</i> Prior sPTB<br><i>Exclusion:</i> Multiple gestations, fetal anomaly, progesterone or heparin treatment during the current pregnancy, current or planned cervical cerclage, hypertension requiring medication, seizure disorder, or a plan to deliver elsewhere | <37                                                  | <37         | 159/463 (34.3%)                              |
| Mercer 1999 (37)  | 1992-1994   | USA     | Cohort       | <i>Inclusion:</i> Singleton<br><i>Exclusion:</i> Placenta previa, major fetal malformations, cervical cerclage, polyhydramnios, oligohydramnios, cervical dilatation of $\geq 2$ cm for nulliparous women and $\geq 3$ cm for multiparous women.                                | <37                                                  | <37         | 89/410 (21.7%)                               |
|                   |             |         |              |                                                                                                                                                                                                                                                                                 |                                                      | <35         | 55/410 (13.4%)                               |
|                   |             |         |              |                                                                                                                                                                                                                                                                                 |                                                      | <32         | 21/410 (5.1%)                                |
|                   |             |         |              |                                                                                                                                                                                                                                                                                 |                                                      | <30         | 12/410 (2.9%)                                |
|                   |             |         |              |                                                                                                                                                                                                                                                                                 |                                                      | <28         | 10/410 (2.4%)                                |
| Owen 2001 (38)    | 1997-1999   | USA     | Cohort       | <i>Inclusion:</i> Prior sPTB, singleton<br><i>Exclusion:</i> chronic medical or obstetrical problems, history of                                                                                                                                                                | <32                                                  | <35         | 48/183 (26.2%)                               |
|                   |             |         |              |                                                                                                                                                                                                                                                                                 |                                                      | <32         | 35/183 (19.1%)                               |
|                   |             |         |              |                                                                                                                                                                                                                                                                                 |                                                      | <28         | 29/183 (15.8%)                               |

| Author               | Time Period | Country     | Study Design | Inclusion/Exclusion Criteria                                                                                                                                                             | Gestational Age at Spontaneous Preterm Birth (weeks) |             | Recurrence Rate of Spontaneous Preterm Birth |
|----------------------|-------------|-------------|--------------|------------------------------------------------------------------------------------------------------------------------------------------------------------------------------------------|------------------------------------------------------|-------------|----------------------------------------------|
|                      |             |             |              |                                                                                                                                                                                          | Pregnancy 1                                          | Pregnancy 2 |                                              |
|                      |             |             |              | substance abuse, uterine anomalies, cerclage                                                                                                                                             |                                                      | <24         | 20/183 (10.9%)                               |
| Rittenberg 2009 (39) | 1995-2005   | USA         | Cohort       | <i>Inclusion:</i> Prior sPTB, singleton pregnancies, referred for weekly 17P administration<br><i>Exclusion:</i> Diagnosis of preterm labour, cerclage or vaginal bleeding at enrollment | <37                                                  | <37         | 185/684 (27.0%)                              |
|                      |             |             |              |                                                                                                                                                                                          |                                                      | <35         | 78/684 (11.4%)                               |
|                      |             |             |              |                                                                                                                                                                                          |                                                      | <32         | 30/684 (4.4%)                                |
| Turitz 2016 (40)     | 2009-2013   | USA         | Cohort       | <i>Inclusion:</i> Prior sPTB                                                                                                                                                             | <37                                                  | <37         | 80/218 (36.7%)                               |
| Uquillas 2017 (46)   | 2005-2011   | USA         | Cohort       | <i>Inclusion:</i> Prior sPTB<br><i>Exclusion:</i> Current cerclage, prior iPTB                                                                                                           | <37                                                  | <37         | 43/181 (23.7%)                               |
|                      |             |             |              |                                                                                                                                                                                          |                                                      | <32         | 6/181 (3.3%)                                 |
| Vermeulen 1999 (41)  | 1994-1996   | Netherlands | RCT          | <i>Inclusion:</i> Prior sPTB<br><i>Exclusion:</i> Fetal anomaly, previous iPTB, known allergy to clindamycin                                                                             | <37                                                  | <37         | 41/168 (24.4%)                               |
|                      |             |             |              |                                                                                                                                                                                          |                                                      | <34         | 14/168 (8.3%)                                |
| Vogel 2007 (42)      | 2000-2001   | USA         | Cohort       | <i>Inclusion:</i> Prior sPTB<br><i>Exclusion:</i> Multiple gestations, ruptured membranes, cerclage in a previous pregnancy                                                              | <30                                                  | <37         | 20/62 (32.3%)                                |
|                      |             |             |              |                                                                                                                                                                                          |                                                      | <35         | 15/62 (24.2%)                                |
| Wallace 2016 (43)    | 1986-2013   | UK          | Cohort       |                                                                                                                                                                                          | <37                                                  | <37         | 449/1,900 (23.6%)                            |
| Yamashita 2015 (44)  | 2008-2012   | Japan       | Cohort       | <i>Inclusion:</i> Prior sPTB<br><i>Exclusion:</i> First antenatal visit after                                                                                                            | <37                                                  | <37         | 89/547 (16.3%)                               |
|                      |             |             |              |                                                                                                                                                                                          |                                                      | <34         | 28/547 (5.1%)                                |

1  
2  
3  
4  
5  
6  
7  
8  
9  
10  
11  
12  
13  
14  
15  
16  
17  
18  
19  
20  
21  
22  
23  
24  
25  
26  
27  
28  
29  
30  
31  
32  
33  
34  
35  
36  
37  
38  
39  
40  
41  
42  
43  
44  
45  
46  
47  
48  
49

| Author         | Time Period | Country | Study Design | Inclusion/Exclusion Criteria                                                                                              | Gestational Age at Spontaneous Preterm Birth (weeks) |             | Recurrence Rate of Spontaneous Preterm Birth |
|----------------|-------------|---------|--------------|---------------------------------------------------------------------------------------------------------------------------|------------------------------------------------------|-------------|----------------------------------------------|
|                |             |         |              |                                                                                                                           | Pregnancy 1                                          | Pregnancy 2 |                                              |
|                |             |         |              | 14 weeks, previous iPTB, placenta previa, placental abruption, multiple gestation, fetal anomaly, antepartum fetal demise |                                                      | <28         | 10/547 (1.8%)                                |
| Yang 2016 (45) | 2005-2011   | USA     | Cohort       |                                                                                                                           | <37                                                  | <37         | 588/1,068 (55.1%)                            |
|                |             |         |              |                                                                                                                           |                                                      | <32         | 71/1,068 (6.6%)                              |
|                |             |         |              |                                                                                                                           | <32                                                  | <32         | 43/177 (24.3%)                               |

Table B2 – Occurrence of Indicated Preterm Birth Following Spontaneous Preterm Birth

| Author            | Time Period | Country | Study Design | Inclusion/Exclusion Criteria                                                                                                                                                                                                                                                                                                                                                                                                                                            | Gestational Age at Preterm Birth (weeks) |             | Occurrence Rate of Indicated Preterm Birth Following a Prior Spontaneous Preterm Birth |
|-------------------|-------------|---------|--------------|-------------------------------------------------------------------------------------------------------------------------------------------------------------------------------------------------------------------------------------------------------------------------------------------------------------------------------------------------------------------------------------------------------------------------------------------------------------------------|------------------------------------------|-------------|----------------------------------------------------------------------------------------|
|                   |             |         |              |                                                                                                                                                                                                                                                                                                                                                                                                                                                                         | Pregnancy 1                              | Pregnancy 2 |                                                                                        |
| Ananth 2006 (15)  | 1989-1997   | USA     | Cohort       | <i>Inclusion:</i> Prior sPTB<br><i>Exclusion:</i> Multiple gestation pregnancies                                                                                                                                                                                                                                                                                                                                                                                        | <37                                      | <37         | 342/12,670 (2.70%)                                                                     |
|                   |             |         |              |                                                                                                                                                                                                                                                                                                                                                                                                                                                                         |                                          | <35         | 121/12,670 (0.96%)                                                                     |
|                   |             |         |              |                                                                                                                                                                                                                                                                                                                                                                                                                                                                         |                                          | <32         | 40/12,670 (0.32%)                                                                      |
|                   |             |         |              |                                                                                                                                                                                                                                                                                                                                                                                                                                                                         | <35                                      | <35         | 121/4,463 (2.71%)                                                                      |
|                   |             |         |              |                                                                                                                                                                                                                                                                                                                                                                                                                                                                         | <32                                      | <32         | 40/2,022 (1.98%)                                                                       |
| Harper 2010 (29)  | 2005-2006   | USA     | RCT          | <i>Inclusion:</i> Prior sPTB, singleton<br><i>Exclusion:</i> Major fetal anomaly, intake of a fish oil supplement >500mg/week at any time during the preceding month, allergy to fish, anticoagulation therapy, hypertension, White's classification D or higher diabetes, drug or alcohol abuse, seizure disorder, uncontrolled thyroid disease, clotting disorder, current or planned cerclage, or a plan to deliver either elsewhere or before 37 weeks of gestation | <37                                      | <37         | 46/852 (5.63%)                                                                         |
| Laughon 2014 (32) | 2002-2010   | USA     | Cohort       | <i>Inclusion:</i> Singleton pregnancies                                                                                                                                                                                                                                                                                                                                                                                                                                 | <37                                      | <37         | 17/3,139 (0.54%)                                                                       |

1  
2  
3  
4  
5  
6  
7  
8  
9  
10  
11  
12  
13  
14  
15  
16  
17  
18  
19  
20  
21  
22  
23  
24  
25  
26  
27  
28  
29  
30  
31  
32  
33  
34  
35  
36  
37  
38  
39  
40  
41  
42  
43  
44  
45  
46  
47  
48  
49

| Author               | Time Period | Country | Study Design | Inclusion/Exclusion Criteria                                                                                                                                                                                                                                                    | Gestational Age at Preterm Birth (weeks) |     | Occurrence Rate of Indicated Preterm Birth Following a Prior Spontaneous Preterm Birth |
|----------------------|-------------|---------|--------------|---------------------------------------------------------------------------------------------------------------------------------------------------------------------------------------------------------------------------------------------------------------------------------|------------------------------------------|-----|----------------------------------------------------------------------------------------|
|                      |             |         |              |                                                                                                                                                                                                                                                                                 | 1                                        | 2   |                                                                                        |
| Meis 2003 (36)       | 1999-2002   | USA     | RCT          | <i>Inclusion:</i> Prior sPTB<br><i>Exclusion:</i> Multiple gestations, fetal anomaly, progesterone or heparin treatment during the current pregnancy, current or planned cervical cerclage, hypertension requiring medication, seizure disorder, or a plan to deliver elsewhere | <37                                      | <37 | 36/463 (7.78%)                                                                         |
| Owen 2001 (38)       | 1997-1999   | USA     | Cohort       | <i>Inclusion:</i> Prior sPTB, singleton<br><i>Exclusion:</i> chronic medical or obstetrical problems, history of substance abuse, uterine anomalies, cerclage                                                                                                                   | <32                                      | <35 | 5/183 (2.73%)                                                                          |
| Rittenberg 2009 (39) | 1995-2005   | USA     | Cohort       | <i>Inclusion:</i> Prior sPTB, singleton pregnancies, referred for weekly 17P administration<br><i>Exclusion:</i> Diagnosis of preterm labour, cerclage or vaginal bleeding at enrollment                                                                                        | <37                                      | <37 | 84/684 (12.28%)                                                                        |

| Author              | Time Period | Country | Study Design | Inclusion/Exclusion Criteria                                                                                                                                                                            | Gestational Age at Preterm Birth (weeks) |             | Occurrence Rate of Indicated Preterm Birth Following a Prior Spontaneous Preterm Birth |
|---------------------|-------------|---------|--------------|---------------------------------------------------------------------------------------------------------------------------------------------------------------------------------------------------------|------------------------------------------|-------------|----------------------------------------------------------------------------------------|
|                     |             |         |              |                                                                                                                                                                                                         | Pregnancy 1                              | Pregnancy 2 |                                                                                        |
| Yamashita 2015 (44) | 2008-2012   | Japan   | Cohort       | <i>Inclusion:</i> Prior sPTB<br><i>Exclusion:</i> First antenatal visit after 14 weeks, previous iPTB, placenta previa, placental abruption, multiple gestation, fetal anomaly, antepartum fetal demise | <37                                      | <37         | 23/547 (4.20%)                                                                         |

1  
2  
3  
4  
5  
6  
7  
8  
9  
10  
11  
12  
13  
14  
15  
16  
17  
18  
19  
20  
21  
22  
23  
24  
25  
26  
27  
28  
29  
30  
31  
32  
33  
34  
35  
36  
37  
38  
39  
40  
41  
42  
43  
44  
45  
46  
47  
48  
49

Appendix C: Quality Assessment

Table C1 – Quality Scores for Included Cohort Studies

| Cohort Studies (Newcastle Ottawa Scale (12)) |                                              |                                            |                                  |                                                                                 |                                                                    |                              |                                                        |                                         |
|----------------------------------------------|----------------------------------------------|--------------------------------------------|----------------------------------|---------------------------------------------------------------------------------|--------------------------------------------------------------------|------------------------------|--------------------------------------------------------|-----------------------------------------|
| Author                                       | Representatives of the exposed cohort (0, 1) | Selection of the non-exposed cohort (0, 1) | Ascertainment of exposure (0, 1) | Demonstration that outcome of interest was not present at start of study (0, 1) | Comparability of cohorts on the basis of design or analysis (0, 1) | Assessment of outcome (0, 1) | Was follow-up long enough for outcomes to occur (0, 1) | Adequacy of follow-up of cohorts (0, 1) |
| Ananth 2006 (15)<br><i>Score: 4/6</i>        | 1                                            | N/A                                        | 0                                | 1                                                                               | N/A                                                                | 0                            | 1                                                      | 1                                       |
| Asrat 1991 (16)<br><i>Score: 5/6</i>         | 0                                            | N/A                                        | 1                                | 1                                                                               | N/A                                                                | 1                            | 1                                                      | 1                                       |
| Care 2014 (17)<br><i>Score: 5/6</i>          | 0                                            | N/A                                        | 1                                | 1                                                                               | N/A                                                                | 1                            | 1                                                      | 1                                       |
| Carr-Hill 1985 (18)<br><i>Score: 4/6</i>     | 1                                            | N/A                                        | 0                                | 1                                                                               | N/A                                                                | 0                            | 1                                                      | 1                                       |
| Coleman 2012 (19)<br><i>Score: 5/6</i>       | 0                                            | N/A                                        | 1                                | 1                                                                               | N/A                                                                | 1                            | 1                                                      | 1                                       |
| Crane 2008 (20)<br><i>Score: 5/6</i>         | 0                                            | N/A                                        | 1                                | 1                                                                               | N/A                                                                | 1                            | 1                                                      | 1                                       |

| Author                                                | Cohort Studies (Newcastle Ottawa Scale (12)) |                                            |                                  |                                                                                 |                                                                    |                              |                                                        |                                         |
|-------------------------------------------------------|----------------------------------------------|--------------------------------------------|----------------------------------|---------------------------------------------------------------------------------|--------------------------------------------------------------------|------------------------------|--------------------------------------------------------|-----------------------------------------|
|                                                       | Representatives of the exposed cohort (0, 1) | Selection of the non-exposed cohort (0, 1) | Ascertainment of exposure (0, 1) | Demonstration that outcome of interest was not present at start of study (0, 1) | Comparability of cohorts on the basis of design or analysis (0, 1) | Assessment of outcome (0, 1) | Was follow-up long enough for outcomes to occur (0, 1) | Adequacy of follow-up of cohorts (0, 1) |
| Drassinower 2015 (21)<br><i>Score: 5/6</i>            | 0                                            | N/A                                        | 1                                | 1                                                                               | N/A                                                                | 1                            | 1                                                      | 1                                       |
| Ekwo 1998 (22)<br><i>Score: 5/6</i>                   | 0                                            | N/A                                        | 1                                | 1                                                                               | N/A                                                                | 1                            | 1                                                      | 1                                       |
| Esplin 2008 (24)<br><i>Score: 4/6</i>                 | 1                                            | N/A                                        | 0                                | 1                                                                               | N/A                                                                | 0                            | 1                                                      | 1                                       |
| Getahun 2010 (25)<br>*PPROM only<br><i>Score: 4/6</i> | 1                                            | N/A                                        | 0                                | 1                                                                               | N/A                                                                | 0                            | 1                                                      | 1                                       |
| Goldenberg 2006 (27)<br><i>Score: 5/6</i>             | 0                                            | N/A                                        | 1                                | 1                                                                               | N/A                                                                | 1                            | 1                                                      | 1                                       |
| Gonzalez-Quintero 2011 (28)<br><i>Score: 5/6</i>      | 0                                            | N/A                                        | 1                                | 1                                                                               | N/A                                                                | 1                            | 1                                                      | 1                                       |



1  
2  
3  
4  
5  
6  
7  
8  
9  
10  
11  
12  
13  
14  
15  
16  
17  
18  
19  
20  
21  
22  
23  
24  
25  
26  
27  
28  
29  
30  
31  
32  
33  
34  
35  
36  
37  
38  
39  
40  
41  
42  
43  
44  
45  
46  
47  
48  
49

| Cohort Studies (Newcastle Ottawa Scale (12)) |                                              |                                            |                                  |                                                                                 |                                                                    |                              |                                                        |                                         |
|----------------------------------------------|----------------------------------------------|--------------------------------------------|----------------------------------|---------------------------------------------------------------------------------|--------------------------------------------------------------------|------------------------------|--------------------------------------------------------|-----------------------------------------|
| Author                                       | Representatives of the exposed cohort (0, 1) | Selection of the non-exposed cohort (0, 1) | Ascertainment of exposure (0, 1) | Demonstration that outcome of interest was not present at start of study (0, 1) | Comparability of cohorts on the basis of design or analysis (0, 1) | Assessment of outcome (0, 1) | Was follow-up long enough for outcomes to occur (0, 1) | Adequacy of follow-up of cohorts (0, 1) |
| Himes 2008 (30)<br><i>Score: 5/6</i>         | 0                                            | N/A                                        | 1                                | 1                                                                               | N/A                                                                | 1                            | 1                                                      | 1                                       |
| Hsieh 2005 (31)<br><i>Score: 5/6</i>         | 0                                            | N/A                                        | 1                                | 1                                                                               | N/A                                                                | 1                            | 1                                                      | 1                                       |
| Laughon 2014 (32)<br><i>Score: 4/6</i>       | 1                                            | N/A                                        | 0                                | 1                                                                               | N/A                                                                | 0                            | 1                                                      | 1                                       |
| Lykke 2009 (33)<br><i>Score: 4/6</i>         | 1                                            | N/A                                        | 0                                | 1                                                                               | N/A                                                                | 0                            | 1                                                      | 1                                       |
| Manuck 2011 (34)<br><i>Score: 5/6</i>        | 0                                            | N/A                                        | 1                                | 1                                                                               | N/A                                                                | 1                            | 1                                                      | 1                                       |
| Markham 2014 (35)<br><i>Score: 5/6</i>       | 0                                            | N/A                                        | 1                                | 1                                                                               | N/A                                                                | 1                            | 1                                                      | 1                                       |
| Mercer 1999 (37)<br><i>Score: 5/6</i>        | 0                                            | N/A                                        | 1                                | 1                                                                               | N/A                                                                | 1                            | 1                                                      | 1                                       |

| Author                                    | Cohort Studies (Newcastle Ottawa Scale (12)) |                                            |                                  |                                                                                 |                                                                    |                              |                                                        |                                         |
|-------------------------------------------|----------------------------------------------|--------------------------------------------|----------------------------------|---------------------------------------------------------------------------------|--------------------------------------------------------------------|------------------------------|--------------------------------------------------------|-----------------------------------------|
|                                           | Representatives of the exposed cohort (0, 1) | Selection of the non-exposed cohort (0, 1) | Ascertainment of exposure (0, 1) | Demonstration that outcome of interest was not present at start of study (0, 1) | Comparability of cohorts on the basis of design or analysis (0, 1) | Assessment of outcome (0, 1) | Was follow-up long enough for outcomes to occur (0, 1) | Adequacy of follow-up of cohorts (0, 1) |
| Owen 2001 (38)<br><i>Score: 5/6</i>       | 0                                            | N/A                                        | 1                                | 1                                                                               | N/A                                                                | 1                            | 1                                                      | 1                                       |
| Rittenberg 2009 (39)<br><i>Score: 5/6</i> | 0                                            | N/A                                        | 1                                | 1                                                                               | N/A                                                                | 1                            | 1                                                      | 1                                       |
| Turitz 2016 (40)<br><i>Score: 5/6</i>     | 0                                            | N/A                                        | 1                                | 1                                                                               | N/A                                                                | 1                            | 1                                                      | 1                                       |
| Uquillas 2017 (46)<br><i>Score: 5/6</i>   | 0                                            | N/A                                        | 1                                | 1                                                                               | N/A                                                                | 1                            | 1                                                      | 1                                       |
| Vogel 2007 (42)<br><i>Score: 5/6</i>      | 0                                            | N/A                                        | 1                                | 1                                                                               | N/A                                                                | 1                            | 1                                                      | 1                                       |
| Wallace 2016 (43)<br><i>Score: 4/6</i>    | 1                                            | N/A                                        | 0                                | 1                                                                               | N/A                                                                | 0                            | 1                                                      | 1                                       |
| Yamashita 2015 (44)<br><i>Score: 5/6</i>  | 0                                            | N/A                                        | 1                                | 1                                                                               | N/A                                                                | 1                            | 1                                                      | 1                                       |

1  
2  
3  
4  
5  
6  
7  
8  
9  
10  
11  
12  
13  
14  
15  
16  
17  
18  
19  
20  
21  
22  
23  
24  
25  
26  
27  
28  
29  
30  
31  
32  
33  
34  
35  
36  
37  
38  
39  
40  
41  
42  
43  
44  
45  
46  
47  
48  
49

| <b>Cohort Studies (Newcastle Ottawa Scale (12))</b> |                                                     |                                                   |                                         |                                                                                        |                                                                           |                                     |                                                               |                                                |
|-----------------------------------------------------|-----------------------------------------------------|---------------------------------------------------|-----------------------------------------|----------------------------------------------------------------------------------------|---------------------------------------------------------------------------|-------------------------------------|---------------------------------------------------------------|------------------------------------------------|
| <b>Author</b>                                       | <b>Representatives of the exposed cohort (0, 1)</b> | <b>Selection of the non-exposed cohort (0, 1)</b> | <b>Ascertainment of exposure (0, 1)</b> | <b>Demonstration that outcome of interest was not present at start of study (0, 1)</b> | <b>Comparability of cohorts on the basis of design or analysis (0, 1)</b> | <b>Assessment of outcome (0, 1)</b> | <b>Was follow-up long enough for outcomes to occur (0, 1)</b> | <b>Adequacy of follow-up of cohorts (0, 1)</b> |
| Yang 2016 (45)<br><i>Score: 4/6</i>                 | 1                                                   | N/A                                               | 0                                       | 1                                                                                      | N/A                                                                       | 0                                   | 1                                                             | 1                                              |

Table C2 – Quality Scores of Included Randomized Controlled Trials – Jadad Scale

| <b>Randomized Controlled Trials (Jadad Scale (13))</b> |                                |                           |                                          |
|--------------------------------------------------------|--------------------------------|---------------------------|------------------------------------------|
| <b>Author</b>                                          | <b>Randomization (0, 1, 2)</b> | <b>Blinding (0, 1, 2)</b> | <b>An account of all patients (0, 1)</b> |
| Elimian 2016 (23)<br><i>Score: 2/5</i>                 | 2                              | 0                         | 0                                        |
| Glover 2011 (26)<br><i>Score: 4/5</i>                  | 1                              | 2                         | 1                                        |
| Harper 2010 (29)<br><i>Score: 5/5</i>                  | 2                              | 2                         | 1                                        |
| Meis 2003 (36)<br><i>Score: 5/5</i>                    | 2                              | 2                         | 1                                        |
| Vermeulen 1999 (41)<br><i>Score: 4/5</i>               | 2                              | 2                         | 0                                        |

Table C3 – Quality Scores of Included Randomized Controlled Trials – Newcastle Ottawa Scale

| Author                                   | Representatives of the exposed cohort (0, 1) | Selection of the non-exposed cohort (0, 1) | Ascertainment of exposure (0, 1) | Demonstration that outcome of interest was not present at start of study (0, 1) | Comparability of cohorts on the basis of design or analysis (0, 1) | Assessment of outcome (0, 1) | Was follow-up long enough for outcomes to occur (0, 1) | Adequacy of follow-up of cohorts (0, 1) |
|------------------------------------------|----------------------------------------------|--------------------------------------------|----------------------------------|---------------------------------------------------------------------------------|--------------------------------------------------------------------|------------------------------|--------------------------------------------------------|-----------------------------------------|
| Elimian 2016 (23)<br><i>Score: 2/5</i>   | 0                                            | 1                                          | 1                                | 1                                                                               | 1                                                                  | 1                            | 1                                                      | 1                                       |
| Glover 2011 (26)<br><i>Score: 4/5</i>    | 0                                            | 1                                          | 1                                | 1                                                                               | 1                                                                  | 1                            | 1                                                      | 1                                       |
| Harper 2010 (29)<br><i>Score: 5/5</i>    | 0                                            | 1                                          | 1                                | 1                                                                               | 1                                                                  | 1                            | 1                                                      | 1                                       |
| Meis 2003 (36)<br><i>Score: 5/5</i>      | 0                                            | 1                                          | 1                                | 1                                                                               | 1                                                                  | 1                            | 1                                                      | 1                                       |
| Vermeulen 1999 (41)<br><i>Score: 4/5</i> | 0                                            | 1                                          | 1                                | 1                                                                               | 1                                                                  | 1                            | 1                                                      | 1                                       |

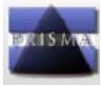

# PRISMA 2009 Checklist

| Section/topic                      | #  | Checklist item                                                                                                                                                                                                                                                                                              | Reported on page # |
|------------------------------------|----|-------------------------------------------------------------------------------------------------------------------------------------------------------------------------------------------------------------------------------------------------------------------------------------------------------------|--------------------|
| <b>TITLE</b>                       |    |                                                                                                                                                                                                                                                                                                             |                    |
| Title                              | 1  | Identify the report as a systematic review, meta-analysis, or both.                                                                                                                                                                                                                                         | 1                  |
| <b>ABSTRACT</b>                    |    |                                                                                                                                                                                                                                                                                                             |                    |
| Structured summary                 | 2  | Provide a structured summary including, as applicable: background; objectives; data sources; study eligibility criteria, participants, and interventions; study appraisal and synthesis methods; results; limitations; conclusions and implications of key findings; systematic review registration number. | 3                  |
| <b>INTRODUCTION</b>                |    |                                                                                                                                                                                                                                                                                                             |                    |
| Rationale                          | 3  | Describe the rationale for the review in the context of what is already known.                                                                                                                                                                                                                              | 5-6                |
| Objectives                         | 4  | Provide an explicit statement of questions being addressed with reference to participants, interventions, comparisons, outcomes, and study design (PICOS).                                                                                                                                                  | 6                  |
| <b>METHODS</b>                     |    |                                                                                                                                                                                                                                                                                                             |                    |
| Protocol and registration          | 5  | Indicate if a review protocol exists, if and where it can be accessed (e.g., Web address), and, if available, provide registration information including registration number.                                                                                                                               | n/a                |
| Eligibility criteria               | 6  | Specify study characteristics (e.g., PICOS, length of follow-up) and report characteristics (e.g., years considered, language, publication status) used as criteria for eligibility, giving rationale.                                                                                                      | 6-8                |
| Information sources                | 7  | Describe all information sources (e.g., databases with dates of coverage, contact with study authors to identify additional studies) in the search and date last searched.                                                                                                                                  | 6                  |
| Search                             | 8  | Present full electronic search strategy for at least one database, including any limits used, such that it could be repeated.                                                                                                                                                                               | Appendix A         |
| Study selection                    | 9  | State the process for selecting studies (i.e., screening, eligibility, included in systematic review, and, if applicable, included in the meta-analysis).                                                                                                                                                   | 7                  |
| Data collection process            | 10 | Describe method of data extraction from reports (e.g., piloted forms, independently, in duplicate) and any processes for obtaining and confirming data from investigators.                                                                                                                                  | 7                  |
| Data items                         | 11 | List and define all variables for which data were sought (e.g., PICOS, funding sources) and any assumptions and simplifications made.                                                                                                                                                                       | 7-8                |
| Risk of bias in individual studies | 12 | Describe methods used for assessing risk of bias of individual studies (including specification of whether this was done at the study or outcome level), and how this information is to be used in any data synthesis.                                                                                      | 7-8                |
| Summary measures                   | 13 | State the principal summary measures (e.g., risk ratio, difference in means).                                                                                                                                                                                                                               | 8                  |
| Synthesis of results               | 14 | Describe the methods of handling data and combining results of studies, if done, including measures of consistency (e.g., $I^2$ ) for each meta-analysis.                                                                                                                                                   | 8                  |

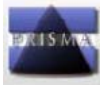

# PRISMA 2009 Checklist

Page 1 of 2

| Section/topic                                                                                                                              | #  | Checklist item                                                                                                                                                                                           | Reported on page #     |
|--------------------------------------------------------------------------------------------------------------------------------------------|----|----------------------------------------------------------------------------------------------------------------------------------------------------------------------------------------------------------|------------------------|
| Risk of bias across studies                                                                                                                | 15 | Specify any assessment of risk of bias that may affect the cumulative evidence (e.g., publication bias, selective reporting within studies).                                                             | 7-8                    |
| Additional analyses                                                                                                                        | 16 | Describe methods of additional analyses (e.g., sensitivity or subgroup analyses, meta-regression), if done, indicating which were pre-specified.                                                         | 8                      |
| <b>RESULTS</b>                                                                                                                             |    |                                                                                                                                                                                                          |                        |
| Study selection                                                                                                                            | 17 | Give numbers of studies screened, assessed for eligibility, and included in the review, with reasons for exclusions at each stage, ideally with a flow diagram.                                          | Figure 1, page 8       |
| Study characteristics                                                                                                                      | 18 | For each study, present characteristics for which data were extracted (e.g., study size, PICOS, follow-up period) and provide the citations.                                                             | Appendix B             |
| Risk of bias within studies                                                                                                                | 19 | Present data on risk of bias of each study and, if available, any outcome level assessment (see item 12).                                                                                                | Appendix C, pages 9-10 |
| Results of individual studies                                                                                                              | 20 | For all outcomes considered (benefits or harms), present, for each study: (a) simple summary data for each intervention group (b) effect estimates and confidence intervals, ideally with a forest plot. | Figures 2, 3, page 8-9 |
| Synthesis of results                                                                                                                       | 21 | Present results of each meta-analysis done, including confidence intervals and measures of consistency.                                                                                                  | Figures 2, 3, page 8-9 |
| Risk of bias across studies                                                                                                                | 22 | Present results of any assessment of risk of bias across studies (see Item 15).                                                                                                                          | Appendix C, pages 9-10 |
| Additional analysis                                                                                                                        | 23 | Give results of additional analyses, if done (e.g., sensitivity or subgroup analyses, meta-regression [see Item 16]).                                                                                    | 9                      |
| <b>DISCUSSION</b>                                                                                                                          |    |                                                                                                                                                                                                          |                        |
| Summary of evidence                                                                                                                        | 24 | Summarize the main findings including the strength of evidence for each main outcome; consider their relevance to key groups (e.g., healthcare providers, users, and policy makers).                     | 10                     |
| Limitations                                                                                                                                | 25 | Discuss limitations at study and outcome level (e.g., risk of bias), and at review-level (e.g., incomplete retrieval of identified research, reporting bias).                                            | 12-13                  |
| Conclusions                                                                                                                                | 26 | Provide a general interpretation of the results in the context of other evidence, and implications for future research.                                                                                  | 13                     |
| <b>FUNDING</b>                                                                                                                             |    |                                                                                                                                                                                                          |                        |
| For peer review only - <a href="http://bmjopen.bmj.com/site/about/guidelines.xhtml">http://bmjopen.bmj.com/site/about/guidelines.xhtml</a> |    |                                                                                                                                                                                                          |                        |

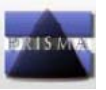

# PRISMA 2009 Checklist

1  
2  
3  
4  
5  
6  
7  
8  
9  
10  
11  
12  
13  
14  
15  
16  
17  
18  
19  
20  
21  
22  
23  
24  
25  
26  
27  
28  
29  
30  
31  
32  
33  
34  
35  
36  
37  
38  
39  
40  
41  
42  
43  
44  
45  
46  
47  
48  
49

|         |    |                                                                                                                                            |   |
|---------|----|--------------------------------------------------------------------------------------------------------------------------------------------|---|
| Funding | 27 | Describe sources of funding for the systematic review and other support (e.g., supply of data); role of funders for the systematic review. | 2 |
|---------|----|--------------------------------------------------------------------------------------------------------------------------------------------|---|

From: Moher D, Liberati A, Tetzlaff J, Altman DG, The PRISMA Group (2009). Preferred Reporting Items for Systematic Reviews and Meta-Analyses: The PRISMA Statement. PLoS Med 6(7): e1000097. doi:10.1371/journal.pmed1000097

For more information, visit: [www.prisma-statement.org](http://www.prisma-statement.org).

Page 2 of 2

For peer review only

# BMJ Open

## Risk of Recurrent Spontaneous Preterm Birth: A Systematic Review and Meta-Analysis

|                                 |                                                                                                                                                                                                   |
|---------------------------------|---------------------------------------------------------------------------------------------------------------------------------------------------------------------------------------------------|
| Journal:                        | <i>BMJ Open</i>                                                                                                                                                                                   |
| Manuscript ID                   | bmjopen-2016-015402.R3                                                                                                                                                                            |
| Article Type:                   | Research                                                                                                                                                                                          |
| Date Submitted by the Author:   | 07-Jun-2017                                                                                                                                                                                       |
| Complete List of Authors:       | Phillips, Courtney; University of Calgary<br>Velji, Zain; University of Calgary<br>Hanly, Ciara; University of British Columbia<br>Metcalf, Amy; University of Calgary, Obstetrics and Gynecology |
| <b>Primary Subject Heading</b>: | Obstetrics and gynaecology                                                                                                                                                                        |
| Secondary Subject Heading:      | Obstetrics and gynaecology, Epidemiology, Evidence based practice, Paediatrics                                                                                                                    |
| Keywords:                       | EPIDEMIOLOGY, NEONATOLOGY, OBSTETRICS, PAEDIATRICS                                                                                                                                                |
|                                 |                                                                                                                                                                                                   |

SCHOLARONE™  
Manuscripts

Peer Review Only



## Risk of Recurrent Spontaneous Preterm Birth: A Systematic Review and Meta-Analysis

Ms. Courtney PHILLIPS<sup>1</sup> BSc, Ms. Zain VELJI<sup>2</sup> BSc, Ms. Ciara HANLY<sup>3</sup>, Dr. Amy METCALFE<sup>4,5</sup> PhD

<sup>1</sup>Cumming School of Medicine, University of Calgary, Calgary, Alberta, Canada

<sup>2</sup>Faculty of Nursing, University of Calgary, Calgary, Alberta, Canada

<sup>3</sup>School of Kinesiology, University of British Columbia, Vancouver, British Columbia, Canada

<sup>4</sup>Department of Obstetrics and Gynecology, University of Calgary, Calgary, Alberta, Canada

<sup>5</sup>Department of Community Health Sciences, University of Calgary, Calgary, Alberta, Canada

### Address for Correspondence:

Amy Metcalfe

Foothills Medical Centre, 4<sup>th</sup> Floor North Tower

1403 29 St NW

Calgary, Alberta, Canada

T2N 2T9

Email: [amy.metcalfe@albertahealthservices.ca](mailto:amy.metcalfe@albertahealthservices.ca)

Phone: 403-944-8458

**Short Title:** Risk of Recurrent Spontaneous Preterm Birth

**Condensation:** The risk of recurrent spontaneous preterm birth is high, and tends to reoccur more frequently following preterm labor than preterm premature rupture of membranes.

**Conflict of Interest:** The authors have no conflicts of interest to report

**Contributorship Statement:** All authors made a substantial contribution to this study. CP, ZV and CH conducted the systematic review. CP drafted the manuscript. AM designed the study and conducted the meta-analysis. All authors critically reviewed the manuscript, interpreted the findings, and approved the final version. All authors had full access to all of the data in the study and can take responsibility for the integrity of the data and the accuracy of the data analysis. As the senior author AM affirms that the manuscript is an honest, accurate, and transparent account of the study being reported, that no important aspects of the study have been omitted, and that any discrepancies from the study as planned have been explained.

**Data Sharing Agreement:** No additional data is available

**Exclusive License:** The Corresponding Author has the right to grant on behalf of all authors and does grant on behalf of all authors, a worldwide license to the Publishers and its licensees in perpetuity, in all forms, formats and media (whether known now or created in the future), to i) publish, reproduce, distribute, display and store the Contribution, ii) translate the Contribution into other languages, create adaptations, reprints, include within collections and create summaries, extracts and/or, abstracts of the Contribution and convert or allow conversion into any format including without limitation audio, iii) create any other derivative work(s) based in whole or part on the on the Contribution, iv) to exploit all subsidiary rights to exploit all subsidiary rights that currently exist or as may exist in the future in the Contribution, v) the

1  
2  
3 inclusion of electronic links from the Contribution to third party material where-ever it may be  
4 located; and, vi) licence any third party to do any or all of the above.  
5  
6

7 **Funding:** This study was funded by the Alberta Children's Hospital Research Institute. Amy  
8 Metcalfe is supported by a New Investigator Award from the Canadian Institutes of Health  
9 Research. The funder had no role in study design, execution, or publication decisions.  
10

11 **Word Count (Abstract):** 224

12 **Word Count (Manuscript):** 2596

13 **Number of References:** 54

14 **Number of Tables:** 0

15 **Number of Figures:** 3

16 **Number of Appendices:** 3  
17  
18  
19  
20  
21  
22  
23  
24  
25  
26  
27  
28  
29  
30  
31  
32  
33  
34  
35  
36  
37  
38  
39  
40  
41  
42  
43  
44  
45  
46  
47  
48  
49  
50  
51  
52  
53  
54  
55  
56  
57  
58  
59  
60

**Abstract**

*Objective:* To determine the risk of recurrent spontaneous preterm birth following spontaneous preterm birth in singleton pregnancies.

*Design:* Systematic review and meta-analysis using random effects models.

*Data Sources:* An electronic literature search was conducted in OVID Medline (1948-2017), Embase (1980-2017), and ClinicalTrials.gov (completed studies effective 2017), supplemented by hand-searching bibliographies of included studies, to find all studies with original data concerning recurrent spontaneous preterm birth.

*Study Eligibility Criteria:* Studies had to include women with at least one spontaneous preterm singleton live birth (<37 weeks) and at least one subsequent pregnancy resulting in a singleton live birth. The Newcastle-Ottawa Scale was used to assess study quality.

*Results:* Overall, 32 articles involving 55,197 women, met all inclusion criteria. Generally studies were well conducted and had a low risk of bias. The absolute risk of recurrent spontaneous preterm birth at <37 weeks gestation was 30.0% (95% CI: 27.0-34.0%). The risk of recurrence due to preterm premature rupture of membranes (PPROM) at <37 weeks gestation was 7.0% (95% CI: 6.0-9.0%), while the risk of recurrence due to preterm labor at <37 weeks gestation was 23.0% (95% CI: 13.0-33.0%).

*Conclusions:* The risk of recurrent spontaneous preterm birth is high and is influenced by the underlying clinical pathway leading to the birth. This information is important for clinicians when discussing the recurrence risk of spontaneous preterm birth with their patients.

**Key Words:** preterm birth, preterm labor, preterm premature rupture of membranes, recurrence, systematic review

### Article Summary – Strengths and Limitations of This Study:

- Study strengths include the comprehensive search strategy with no language restrictions used in the nature of the systematic review.
- Limitations primarily relate to the underlying data that was available on this topic. Most of the included studies were observational in nature. Additionally, many primary studies examining the recurrence risk of preterm birth had to be excluded as they did not clearly differentiate between spontaneous and indicated preterm delivery. There was a high degree of heterogeneity in the studies included in the meta-analysis.

## Introduction

Preterm birth (PTB) is defined as any live birth occurring before 37 completed weeks of gestation; this can be subdivided into extremely preterm (<28 weeks), very preterm (28-<32 weeks), moderately preterm (32-<34 weeks) and late preterm (34-<37 weeks) birth based on the gestational age at delivery (1). This sub-categorization is important as gestational age is inversely associated with increased mortality, morbidity and the intensity of neonatal care required at birth (2). Worldwide, 11.1% of infants are born preterm every year (2). Preterm birth is the leading cause of perinatal morbidity and mortality, and second most common cause of death, after pneumonia, in children under five years of age (3, 4).

Indicated preterm births (iPTB) are those induced for medical reasons, such as pre-eclampsia, intrauterine growth restriction, or fetal distress. However, approximately 70% of PTB occur spontaneously (sPTB) (5). The clinical pathways that lead to sPTB typically include preterm labor (PTL) and preterm premature rupture of membranes (PPROM), although these occur on a spectrum and may co-occur in the same clinical setting. PTL is defined as regular contractions and cervical changes at less than 37 weeks gestation, and PPRM is defined as spontaneous rupture of membranes at least one hour before contractions at less than 37 weeks gestation (5). Known risk factors for spontaneous preterm birth include a previous preterm birth, black race, low maternal body-mass index, comorbidities, a short cervical length and a raised fetal fibronectin concentration (5, 6). Despite knowing these risk factors, our understanding of the etiology behind sPTB is poor and sPTB is considered to be multifactorial in nature (6, 7).

Although sPTB has a tendency to recur, little is known about the recurrence risk (7). This is of concern because sPTB is a leading cause of neonatal morbidity and mortality, and it also has a large economic burden (8). Further, women who have had a previous sPTB are likely to be anxious during their subsequent pregnancies, which itself can lead to sPTB and other adverse

1  
2  
3 pregnancy outcomes (9-11). Therefore, we conducted a systematic review and meta-analysis to  
4  
5 investigate the absolute risk of recurrent sPTB following sPTB in singleton pregnancies. By  
6  
7 better understanding the recurrence risk of sPTB, healthcare workers may be better equipped to  
8  
9 manage patient needs and anxieties, as well as develop and apply preventative treatments.  
10  
11

## 12 13 14 **Methods**

15 Two study authors (ZV and CH) executed a comprehensive literature search of Medline (from  
16  
17 1946 to 2015) and Embase (from 1980 to 2015) to identify publications that contained key terms  
18  
19 related to recurrent sPTB in June 2015. The search was updated in July 2016, and expanded to  
20  
21 included completed studies identified through ClinicalTrials.gov. The search was further updated  
22  
23 in May 2017. PPRM, PTL and related terms were included in the search. For the full search  
24  
25 strategy, please refer to Appendix A. Titles and abstracts of these articles were screened for  
26  
27 relevance by 2 reviewers (ZV and CH) to determine which articles were to undergo full-text  
28  
29 review. Articles identified by either reviewer at this stage as potentially relevant moved onto full  
30  
31 text review. Articles identified by either reviewer at this stage as potentially relevant moved onto full  
32  
33 text review. Two independent reviewers (ZV and CP) jointly assessed the final eligibility of the  
34  
35 full-text reviewed articles. We resolved disagreements in full-text eligibility or data abstraction  
36  
37 by involvement of a third party (AM). The bibliographies of included studies were reviewed to  
38  
39 identify additional publications not found through the database search. A complete summary of  
40  
41 the search strategy can be found in Figure 1. No patients were directly involved in this study. As  
42  
43 this study only used published data, it was exempt from Institutional Review Board approval.  
44  
45  
46  
47

48 All studies with original data concerning recurrent sPTB and  $N \geq 20$  were considered for  
49  
50 inclusion. No language restrictions were used. Conference abstracts were not considered. To be  
51  
52 included, studies had to include women with at least one spontaneous preterm live birth (delivery  
53  
54  $< 37$  weeks of gestation) in their obstetric history and at least one subsequent pregnancy resulting  
55  
56  
57  
58  
59  
60

1  
2  
3 in a live birth. Only studies looking at singleton pregnancies were included. Animal studies,  
4  
5 studies that only included iPTB, studies that combined iPTB and sPTB, and studies on PPRM  
6  
7 or PTL where it was not clear if it resulted in sPTB were excluded. In the case of duplicate data,  
8  
9 the study with the largest sample size was included.  
10  
11

12  
13 The data extraction was completed independently by ZV and CP using a standardized  
14  
15 data extraction form. Data was reviewed by AM prior to analysis to ensure completeness.  
16  
17 Information on the authors, title, publication year, data year, location of study, study design,  
18  
19 definitions of preterm birth, and inclusion and exclusion criteria were all extracted. In addition,  
20  
21 information was extracted on the number of women with spontaneous preterm birth in their  
22  
23 initial pregnancy, whether due to PPRM or PTL, number of women with term births in  
24  
25 subsequent pregnancies, and number of women with preterm births in subsequent pregnancies,  
26  
27 whether due to PPRM, PTL or indicated causes. For studies that reported on total reproductive  
28  
29 history, only data on the first 2 consecutive pregnancies were extracted. Given the observational  
30  
31 nature of this review, the Newcastle-Ottawa Scale (12) was used to assess study quality of both  
32  
33 cohort studies and randomized controlled trials.  
34  
35  
36  
37  
38

39 The primary outcome measured was the recurrence rate of sPTB at <37 weeks gestation.  
40  
41 Secondary outcomes were recurrence rate of sPTB due to PPRM at <37 weeks (following  
42  
43 sPTB due to PPRM in the index pregnancy), recurrence rate of sPTB due to PTL at <37 weeks  
44  
45 (following sPTB due to PTL in the index pregnancy), the recurrence of sPTB by gestational age,  
46  
47 and occurrence of iPTB at <37 weeks after a previous sPTB.  
48  
49

50 For our analysis, we reported the pooled risk of recurrent preterm birth and  
51  
52 accompanying 95% confidence interval (CIs) for sPTB <37 weeks gestation, by iPTB, by  
53  
54 gestational age overall, and for PPRM and PTL. Stratified analysis was used to examine the  
55  
56  
57  
58  
59  
60

1  
2  
3 recurrence rate of sPTB <37 weeks gestation by study design and quality. An a priori decision  
4 was made to use a random-effects model for all models in anticipation of clinical heterogeneity  
5 between studies. The metaprop command in Stata was used to conduct the analysis and exact  
6 confidence intervals were reported (13). Forest plots were used to graphically represent the data.  
7  
8 Heterogeneity between studies was assessed using  $I^2$ , the Cochran Q statistic, and  
9  
10 accompanying p-values. All analyses were conducted using Stata SE Version 14 (College  
11  
12 Station, Texas).  
13  
14  
15  
16  
17  
18  
19

## 20 21 **Results**

22 The search returned 11,775 articles, of which 118 met criteria for full-text review (Figure 1).  
23  
24 Overall 32 articles met all of the inclusion criteria and were included in the review (14-45). A  
25  
26 summary of all of the studies' data can be found in Appendix B (recurrence risk of sPTB is  
27  
28 located in Table B1 and occurrence risk of iPTB following sPTB is located in Table B2). The  
29  
30 included studies were almost entirely cohort studies, with only five randomized controlled trials  
31  
32 (22, 26, 28, 35, 40). The sample sizes in the studies ranged from 33 to 17,334 women and the  
33  
34 rate of recurrent sPTB at <37 weeks gestation ranged from 15.4% to 85.5%. Many of the studies  
35  
36 had different definitions of sPTB and therefore they could not be combined for meta-analysis.  
37  
38 There were only a sufficient number of studies that defined preterm birth as occurring prior to 37  
39  
40 weeks in both the index and subsequent pregnancy to create pooled estimates.  
41  
42  
43  
44  
45

46 The overall risk of recurrent sPTB at <37 weeks gestation (n=25 studies, 52,070 women)  
47  
48 was 30.0% (95% CI: 27.0-34.0%) with a significant Q (P=0.00) and  $I^2$  of 98.6%, indicating  
49  
50 between-study heterogeneity (Figure 2). The recurrence rate did not significantly differ between  
51  
52 randomized controlled trials (34.0%, 95% CI: 29.0-38.0%; n=5 studies, 1,661 women) and  
53  
54 cohort studies (29.0%, 95% CI: 26.0-33.0%, n=20 studies, 50,409 women). The risk of iPTB at  
55  
56  
57  
58  
59  
60



1  
2  
3 <37 weeks gestation after a previous spontaneous preterm birth (n=6 studies, 18,355 women)  
4  
5 was 5.0% (95% CI: 3.0-7.0%) with an  $I^2$  of 98.0%.  
6  
7

8 Few studies looked specifically at the recurrence of PPRM and PTL resulting in sPTB  
9  
10 in singleton pregnancies following prior PPRM or PTL respectively. However, the identified  
11 risk of recurrent PPRM at <37 weeks gestation (n=4 studies, 3,138 women) was 7.0% (95%  
12 CI: 6.0-9.0%) with an  $I^2$  of 51.0% and the risk of recurrent PTL at <37 weeks gestation (n=3  
13 studies, 2,852 women) was 23.0% (95% CI: 13.0-33.0%) with an  $I^2$  of 97.3% (Figure 3).  
14  
15  
16  
17  
18  
19

20 The majority of the studies were of high quality (Appendix C). As this study exclusively  
21 examined the recurrence risk of spontaneous preterm birth, two elements of the Newcastle  
22 Ottawa Scale relating to the selection of the unexposed cohort and the comparability of the  
23 exposed and unexposed cohorts were unable to be assessed. Cohort studies typically traded off  
24 between being generalizable to the broader patient population not seen in a tertiary center or  
25 having detailed clinical data available. All cohort studies had a quality score of 4 or 5 out of a  
26 possible 6 points. No statistically significant differences in the recurrence rate of sPTB prior to  
27 37 weeks was observed based on quality score in cohort studies (Score 4: 27.0%, 95% CI: 21.0-  
28 32.0%; Score 5: 31.0%, 95% CI: 26.0-36.0%). All randomized controlled trials were deemed to  
29 be high quality (score 7/8).  
30  
31  
32  
33  
34  
35  
36  
37  
38  
39  
40  
41  
42  
43  
44  
45

## 46 Discussion

47 This meta-analysis provides an overview of the overall risk of recurrent spontaneous preterm  
48 birth. We found that the absolute risk of recurrent sPTB at less than 37 weeks gestation in  
49 pregnancies was 30%; this estimate was consistent across study designs and study quality.  
50  
51 Interestingly, the risk of recurrent PTL was found to be 23%, similar to the overall risk of  
52 recurrent sPTB. Conversely, if a woman has a sPTB due to PPRM, she is less likely to have  
53  
54  
55  
56  
57  
58  
59  
60

1  
2  
3 recurrent PPROM leading to sPTB, with a risk of only 7%. Thus the clinical pathway that leads  
4 to sPTB appears to influence the risk of recurrence.  
5  
6

7  
8 In a 2014 systematic review by Kazemier et al., they found that the risk of recurrence of  
9 preterm birth is influenced by the singleton/twin order in both pregnancies. When they looked at  
10 spontaneous preterm singleton births after a previous singleton pregnancy, they found that the  
11 risk of recurrence of sPTB was 20.2% (46). In contrast to ours, their search strategy was  
12 exceedingly complex and included only cohort studies. Ultimately after abstract review they  
13 were left with only six studies that looked at singleton-singleton pregnancies, which could  
14 explain the difference in our recurrence risk. Further, our study is novel as we differentiated risk  
15 by clinical pathway leading to sPTB, whether PTL or PPROM. Ultimately, we found that while  
16 all sPTB tends to recur, the clinical pathway of the first sPTB is important in determining that  
17 recurrence risk. Previous studies tend to combine these underlying pathways together, but our  
18 results suggest that perhaps they should not be pooled. Some studies also suggest that children  
19 born following PPROM have increased mortality (47-49) and worse health outcomes (50)  
20 compared to children born after PTL, which further supports the premise that these should be  
21 looked at as separate clinical conditions.  
22  
23  
24  
25  
26  
27  
28  
29  
30  
31  
32  
33  
34  
35  
36  
37  
38  
39

40  
41 However, new evidence suggests that PTB and the underlying pathologies that lead to  
42 PTB are not mutually exclusive, thus spontaneous and indicated PTB should perhaps not be  
43 considered completely separate phenomena. Basso and Wilcox estimated that mortality due to  
44 immaturity itself was about 51%, whereas underlying pathologies that led to PTB accounted for  
45 approximately half of mortality (51). Similarly, in a recent study by Brown et al., the authors  
46 found that gestational age is on the causal path between biological determinants of preterm birth  
47 and neonatal outcomes (52). Infants who were exposed to both pathological intrauterine  
48  
49  
50  
51  
52  
53  
54  
55  
56  
57  
58  
59  
60

1  
2  
3 conditions and early delivery had increased risk for poor neonatal outcomes. As such a  
4  
5 pathological intrauterine environment, for instance, one characterized by infection, placental  
6  
7 ischemia and other biological determinants, acts through early delivery to produce poor  
8  
9 outcomes. Ananth et al. found that women with a sPTB were not only likely to experience  
10  
11 recurrent sPTB, but they were also associated with increased risks of having a medically  
12  
13 indicated PTB, and vice versa (7). Prevention of preterm mortality requires more than the  
14  
15 resolution of PTB, but must also address the underlying etiologies.  
16  
17  
18

19  
20 Strengths of our systematic review and meta-analysis include our broad search strategy  
21  
22 with no language restrictions, which resulted in a large sample size of pooled data. Limitations  
23  
24 include the fact that most of the studies were observational cohort studies and thus prone to bias,  
25  
26 and there was significant between-study heterogeneity. This is important as many women  
27  
28 included in this body of literature would have been offered some form of therapy to reduce their  
29  
30 risks of recurrent preterm birth. In a similar vein, we also included participants from both the  
31  
32 treated and control arms of the included randomized controlled trials. With the exception of the  
33  
34 trial lead by Meis et al, which found a statistically significant reduction in the incidence of sPTB  
35  
36 in women treated with progesterone (RR=0.66, 95% CI: 0.54-0.81) (35), the other trials had null  
37  
38 findings. Strategies to prevent preterm birth are varied and evidence of their effectiveness are  
39  
40 mixed (53). Effective strategies to prevent preterm birth can be implemented at the individual  
41  
42 level (i.e. progesterone supplementation, cervical cerclage, smoking cessation), the  
43  
44 clinic/hospital level (i.e. hard-stop policies to prevent non-medically indicated late preterm and  
45  
46 early term birth, preterm birth prevention clinics) and the societal level (i.e. smoke-free  
47  
48 legislation to reduce environmental tobacco smoke, legislation regarding single-embryo transfer  
49  
50 during in vitro fertilization) (53). As documentation of specific treatment strategies was not  
51  
52  
53  
54  
55  
56  
57  
58  
59  
60

1  
2  
3 consistently reported in this body of literature, we were not able to synthesize these results  
4  
5 according to specific types of treatment. While both small and large studies were identified and  
6  
7 included, publication bias cannot be entirely ruled out. While the decision to only include studies  
8  
9 with a minimum sample size of 20 was used to exclude case studies of rare cases that may not be  
10  
11 generalizable, this may have inadvertently resulted in the exclusion of some small case series.  
12  
13 Additionally, we only searched 3 independent sources and reviewed the bibliographies of  
14  
15 included articles, thus articles in journals that were not indexed in either Medline or Embase or  
16  
17 studies that were not registered on clinicaltrials.gov or were not cited by articles that were  
18  
19 ultimately included in this review would not have been identified. We anticipate that the impact  
20  
21 of this would be minimal as a study examining the effectiveness of different databases to identify  
22  
23 studies related to maternal morbidity and mortality concluded that Medline and Embase has the  
24  
25 highest yield in identifying unique studies, and that over 60% of all studies were identified by  
26  
27 multiple sources (54). Although we were able to identify a large number of studies, many of  
28  
29 them used different definitions for preterm birth and most did not identify the clinical pathway to  
30  
31 PTB; as a consequence, these data could not be pooled and not all of the existing evidence could  
32  
33 be summarized in this review.  
34  
35  
36  
37  
38  
39

40  
41 In conclusion, our study reaffirmed that a previous spontaneous preterm birth is a  
42  
43 significant risk factor for recurrence in subsequent pregnancies, placing that risk at 30%.  
44  
45 However, substantial heterogeneity in underlying studies speaks to the need for common  
46  
47 definitions and further work in this area. Additionally, the absolute risk of recurrence appears to  
48  
49 be substantially higher if the underlying etiology is PTL as opposed to PPRM. Clinically, this  
50  
51 information will help with risk stratification and patient counseling. Interventions to prevent PTB  
52  
53 need to be focused and designed for specific clinical conditions. Further studies need to be done  
54  
55  
56  
57  
58  
59  
60

1  
2  
3  
4  
5  
6  
7  
8  
9  
10  
11  
12  
13  
14  
15  
16  
17  
18  
19  
20  
21  
22  
23  
24  
25  
26  
27  
28  
29  
30  
31  
32  
33  
34  
35  
36  
37  
38  
39  
40  
41  
42  
43  
44  
45  
46  
47  
48  
49  
50  
51  
52  
53  
54  
55  
56  
57  
58  
59  
60

that look at the efficacy of preventative treatments in the prevention of PTL and PPROM.

Knowledge of the etiology of previous sPTB may help identify women at increased risk of sPTB for participation in future clinical trials.

For peer review only

## References

1. March of Dimes, PMNCH, Save the Children, WHO. The global action report on preterm birth. Geneva: World Health Organization; 2012.
2. Blencowe H, Cousens S, Oestergaard MZ, Chou D, Moller AB, Narwal R, et al. National, regional, and worldwide estimates of preterm birth rates in the year 2010 with time trends since 1990 for selected countries: a systematic analysis and implications. *Lancet*. 2012;379(9832):2162-72.
3. Lawn JE, Cousens S, Zupan J, Lancet Neonatal Survival Steering T. 4 million neonatal deaths: when? Where? Why? *Lancet*. 2005;365(9462):891-900.
4. Liu L, Johnson HL, Cousens S, Perin J, Scott S, Lawn JE, et al. Global, regional, and national causes of child mortality: an updated systematic analysis for 2010 with time trends since 2000. *Lancet*. 2012;379(9832):2151-61.
5. Goldenberg RL, Culhane JF, Iams JD, Romero R. Epidemiology and causes of preterm birth. *Lancet*. 2008;371(9606):75-84.
6. Mazaki-Tovi S, Romero R, Kusanovic JP, Erez O, Pineles BL, Gotsch F, et al. Recurrent preterm birth. *Semin Perinatol*. 2007;31(3):142-58.
7. Ananth CV, Vintzileos AM. Epidemiology of preterm birth and its clinical subtypes. *J Matern Fetal Neonatal Med*. 2006;19(12):773-82.
8. Lim G, Tracey J, Boom N, Karmakar S, Wang J, Berthelot JM, et al. CIHI survey: Hospital costs for preterm and small-for-gestational age babies in Canada. *Healthc Q*. 2009;12(4):20-4.
9. McDonald SW, Kingston D, Bayrampour H, Dolan SM, Tough SC. Cumulative psychosocial stress, coping resources, and preterm birth. *Arch Womens Ment Health*. 2014;17(6):559-68.
10. Shapiro GD, Fraser WD, Frasc MG, Seguin JR. Psychosocial stress in pregnancy and preterm birth: associations and mechanisms. *J Perinat Med*. 2013;41(6):631-45.
11. Loomans EM, van Dijk AE, Vrijkotte TG, van Eijnsden M, Stronks K, Gemke RJ, et al. Psychosocial stress during pregnancy is related to adverse birth outcomes: results from a large multi-ethnic community-based birth cohort. *Eur J Public Health*. 2013;23(3):485-91.
12. Wells G, Shea B, O'Connell D, Peterson J, Welch V, Losos M, et al. The Newcastle-Ottawa Scale (NOS) for assessing the quality of nonrandomized studies in meta-analysis Ottawa: Ottawa Hospital Research Institute; 2014 [Available from: [http://www.ohri.ca/programs/clinical\\_epidemiology/oxford.asp](http://www.ohri.ca/programs/clinical_epidemiology/oxford.asp)].
13. Nyaga VN, Arbyn M, Aerts M. Metaprop: a Stata command to perform meta-analysis of binomial data. *Arch Public Health*. 2014;72(1):39.
14. Ananth CV, Getahun D, Peltier MR, Salihu HM, Vintzileos AM. Recurrence of spontaneous versus medically indicated preterm birth. *Am J Obstet Gynecol*. 2006;195(3):643-50.
15. Asrat T, Lewis DF, Garite TJ, Major CA, Nageotte MP, Towers CV, et al. Rate of recurrence of preterm premature rupture of membranes in consecutive pregnancies. *Am J Obstet Gynecol*. 1991;165(4 Pt 1):1111-5.
16. Care AG, Sharp AN, Lane S, Roberts D, Watkins L, Alfirevic Z. Predicting preterm birth in women with previous preterm birth and cervical length  $\geq$  25 mm. *Ultrasound Obstet Gynecol*. 2014;43(6):681-6.
17. Carr-Hill RA, Hall MH. The repetition of spontaneous preterm labour. *Br J Obstet Gynaecol*. 1985;92(9):921-8.

18. Coleman S, Wallace L, Alexander J, Istwan N. Recurrent preterm birth in women treated with 17 alpha-hydroxyprogesterone caproate: the contribution of risk factors in the penultimate pregnancy. *J Matern Fetal Neonatal Med.* 2012;25(7):1034-8.
19. Crane JM, Hutchens D. Use of transvaginal ultrasonography to predict preterm birth in women with a history of preterm birth. *Ultrasound Obstet Gynecol.* 2008;32(5):640-5.
20. Drassinower D, Obican SG, Siddiq Z, Heller D, Gyamfi-Bannerman C, Friedman AM. Does the clinical presentation of a prior preterm birth predict risk in a subsequent pregnancy? *Am J Obstet Gynecol.* 2015;213(5):686 e1-7.
21. Ekwo E, Moawad A. The risk for recurrence of premature births to African-American and white women. *J Assoc Acad Minor Phys.* 1998;9(1):16-21.
22. Elimian A, Smith K, Williams M, Knudtson E, Goodman JR, Escobedo MB. A randomized controlled trial of intramuscular versus vaginal progesterone for the prevention of recurrent preterm birth. *Int J Gynaecol Obstet.* 2016;134(2):169-72.
23. Esplin MS, O'Brien E, Fraser A, Kerber RA, Clark E, Simonsen SE, et al. Estimating recurrence of spontaneous preterm delivery. *Obstet Gynecol.* 2008;112(3):516-23.
24. Getahun D, Strickland D, Ananth CV, Fassett MJ, Sacks DA, Kirby RS, et al. Recurrence of preterm premature rupture of membranes in relation to interval between pregnancies. *Am J Obstet Gynecol.* 2010;202(6):570 e1-6.
25. Glover MM, McKenna DS, Downing CM, Smith DB, Croom CS, Sonek JD. A randomized trial of micronized progesterone for the prevention of recurrent preterm birth. *Am J Perinatol.* 2011;28(5):377-81.
26. Goldenberg RL, Andrews WW, Faye-Petersen O, Cliver S, Goepfert AR, Hauth JC. The Alabama Preterm Birth Project: placental histology in recurrent spontaneous and indicated preterm birth. *Am J Obstet Gynecol.* 2006;195(3):792-6.
27. Gonzalez-Quintero VH, Cordova YC, Istwan NB, Tudela F, Rhea DJ, Romary LM, et al. Influence of gestational age and reason for prior preterm birth on rates of recurrent preterm delivery. *Am J Obstet Gynecol.* 2011;205(3):275 e1-5.
28. Harper M, Thom E, Klebanoff MA, Thorp J, Jr., Sorokin Y, Varner MW, et al. Omega-3 fatty acid supplementation to prevent recurrent preterm birth: a randomized controlled trial. *Obstet Gynecol.* 2010;115(2 Pt 1):234-42.
29. Himes KP, Simhan HN. Risk of recurrent preterm birth and placental pathology. *Obstet Gynecol.* 2008;112(1):121-6.
30. Hsieh TT, Chen SF, Shau WY, Hsieh CC, Hsu JJ, Hung TH. The impact of interpregnancy interval and previous preterm birth on the subsequent risk of preterm birth. *J Soc Gynecol Investig.* 2005;12(3):202-7.
31. Laughon SK, Albert PS, Leisher K, Mendola P. The NICHD Consecutive Pregnancies Study: recurrent preterm delivery by subtype. *Am J Obstet Gynecol.* 2014;210(2):131 e1-8.
32. Lykke JA, Paidas MJ, Langhoff-Roos J. Recurring complications in second pregnancy. *Obstet Gynecol.* 2009;113(6):1217-24.
33. Manuck TA, Henry E, Gibson J, Varner MW, Porter TF, Jackson GM, et al. Pregnancy outcomes in a recurrent preterm birth prevention clinic. *Am J Obstet Gynecol.* 2011;204(4):320 e1-6.
34. Markham KB, Walker H, Lynch CD, Iams JD. Preterm birth rates in a prematurity prevention clinic after adoption of progestin prophylaxis. *Obstet Gynecol.* 2014;123(1):34-9.

- 1  
2  
3 35. Meis PJ, Klebanoff M, Thom E, Dombrowski MP, Sibai B, Moawad AH, et al.  
4 Prevention of recurrent preterm delivery by 17 alpha-hydroxyprogesterone caproate. *N Engl J*  
5 *Med.* 2003;348(24):2379-85.
- 6  
7 36. Mercer BM, Goldenberg RL, Moawad AH, Meis PJ, Iams JD, Das AF, et al. The preterm  
8 prediction study: effect of gestational age and cause of preterm birth on subsequent obstetric  
9 outcome. National Institute of Child Health and Human Development Maternal-Fetal Medicine  
10 Units Network. *Am J Obstet Gynecol.* 1999;181(5 Pt 1):1216-21.
- 11 37. Owen J, Yost N, Berghella V, Thom E, Swain M, Dildy GA, 3rd, et al. Mid-trimester  
12 endovaginal sonography in women at high risk for spontaneous preterm birth. *JAMA.*  
13 2001;286(11):1340-8.
- 14 38. Rittenberg C, Newman RB, Istwan NB, Rhea DJ, Stanziano GJ. Preterm birth prevention  
15 by 17 alpha-hydroxyprogesterone caproate vs. daily nursing surveillance. *J Reprod Med.*  
16 2009;54(2):47-52.
- 17 39. Turitz AL, Bastek JA, Purisch SE, Elovitz MA, Levine LD. Patient characteristics  
18 associated with 17-alpha hydroxyprogesterone caproate use among a high-risk cohort. *Am J*  
19 *Obstet Gynecol.* 2016;214(4):536 e1-5.
- 20 40. Vermeulen GM, Bruinse HW. Prophylactic administration of clindamycin 2% vaginal  
21 cream to reduce the incidence of spontaneous preterm birth in women with an increased  
22 recurrence risk: a randomised placebo-controlled double-blind trial. *Br J Obstet Gynaecol.*  
23 1999;106(7):652-7.
- 24 41. Vogel I, Goepfert AR, Thorsen P, Skogstrand K, Hougaard DM, Curry AH, et al. Early  
25 second-trimester inflammatory markers and short cervical length and the risk of recurrent  
26 preterm birth. *J Reprod Immunol.* 2007;75(2):133-40.
- 27 42. Wallace JM, Bhattacharya S, Campbell DM, Horgan GW. Inter-Pregnancy Weight  
28 Change and the Risk of Recurrent Pregnancy Complications. *PLoS One.* 2016;11(5):e0154812.
- 29 43. Yamashita M, Hayashi S, Endo M, Okuno K, Fukui O, Mimura K, et al. Incidence and  
30 risk factors for recurrent spontaneous preterm birth: A retrospective cohort study in Japan. *J*  
31 *Obstet Gynaecol Res.* 2015;41(11):1708-14.
- 32 44. Yang J, Baer RJ, Berghella V, Chambers C, Chung P, Coker T, et al. Recurrence of  
33 Preterm Birth and Early Term Birth. *Obstet Gynecol.* 2016;128(2):364-72.
- 34 45. Uquillas KR, Fox NS, Rebarber A, Saltzman DH, Klausner CK, Roman AS. A comparison  
35 of cervical length measurement techniques for the prediction of spontaneous preterm birth. *J*  
36 *Matern Fetal Neonatal Med.* 2017;30(1):50-3.
- 37 46. Kazemier BM, Buijs PE, Mignini L, Limpens J, de Groot CJ, Mol BW, et al. Impact of  
38 obstetric history on the risk of spontaneous preterm birth in singleton and multiple pregnancies: a  
39 systematic review. *BJOG.* 2014;121(10):1197-208; discussion 209.
- 40 47. Kamath-Rayne BD, DeFranco EA, Chung E, Chen A. Subtypes of preterm birth and the  
41 risk of postneonatal death. *J Pediatr.* 2013;162(1):28-34 e2.
- 42 48. Villar J, Abalos E, Carroli G, Giordano D, Wojdyla D, Piaggio G, et al. Heterogeneity of  
43 perinatal outcomes in the preterm delivery syndrome. *Obstet Gynecol.* 2004;104(1):78-87.
- 44 49. Chen A, Feresu SA, Barsoom MJ. Heterogeneity of preterm birth subtypes in relation to  
45 neonatal death. *Obstet Gynecol.* 2009;114(3):516-22.
- 46 50. Newman DE, Paamoni-Keren O, Press F, Wiznitzer A, Mazor M, Sheiner E. Neonatal  
47 outcome in preterm deliveries between 23 and 27 weeks' gestation with and without preterm  
48 premature rupture of membranes. *Arch Gynecol Obstet.* 2009;280(1):7-11.
- 49  
50  
51  
52  
53  
54  
55  
56  
57  
58  
59  
60



- 1
- 2
- 3
- 4 51. Basso O, Wilcox A. Mortality risk among preterm babies: immaturity versus underlying
- 5 pathology. *Epidemiology*. 2010;21(4):521-7.
- 6 52. Brown HK, Speechley KN, Macnab J, Natale R, Campbell MK. Neonatal morbidity
- 7 associated with late preterm and early term birth: the roles of gestational age and biological
- 8 determinants of preterm birth. *Int J Epidemiol*. 2014;43(3):802-14.
- 9 53. Newnham JP, Dickinson JE, Hart RJ, Pennell CE, Arrese CA, Keelan JA. Strategies to
- 10 prevent preterm birth. *Front Immunol*. 2014;5:584.
- 11 54. Betran AP, Say L, Gulmezoglu AM, Allen T, Hampson L. Effectiveness of different
- 12 databases in identifying studies for systematic reviews: experience from the WHO systematic
- 13 review of maternal morbidity and mortality. *BMC Med Res Methodol*. 2005;5(1):6.
- 14
- 15
- 16
- 17
- 18
- 19
- 20
- 21
- 22
- 23
- 24
- 25
- 26
- 27
- 28
- 29
- 30
- 31
- 32
- 33
- 34
- 35
- 36
- 37
- 38
- 39
- 40
- 41
- 42
- 43
- 44
- 45
- 46
- 47
- 48
- 49
- 50
- 51
- 52
- 53
- 54
- 55
- 56
- 57
- 58
- 59
- 60

1  
2  
3 Figure 1: Flow diagram of included studies  
4

5  
6 Figure 2. Forest plot of the rate of recurrent spontaneous preterm birth at <37 weeks gestation  
7

8 Figure 3. Forest plots of the rate of (a) recurrent PPROM and (b) recurrent PTL at <37 weeks  
9 gestation  
10  
11  
12  
13  
14  
15  
16  
17  
18  
19  
20  
21  
22  
23  
24  
25  
26  
27  
28  
29  
30  
31  
32  
33  
34  
35  
36  
37  
38  
39  
40  
41  
42  
43  
44  
45  
46  
47  
48  
49  
50  
51  
52  
53  
54  
55  
56  
57  
58  
59  
60

For peer review only

1  
2  
3  
4  
5  
6  
7  
8  
9  
10  
11  
12  
13  
14  
15  
16  
17  
18  
19  
20  
21  
22  
23  
24  
25  
26  
27  
28  
29  
30  
31  
32  
33  
34  
35  
36  
37  
38  
39  
40  
41  
42  
43  
44  
45  
46  
47  
48  
49  
50  
51  
52  
53  
54  
55  
56  
57  
58  
59  
60

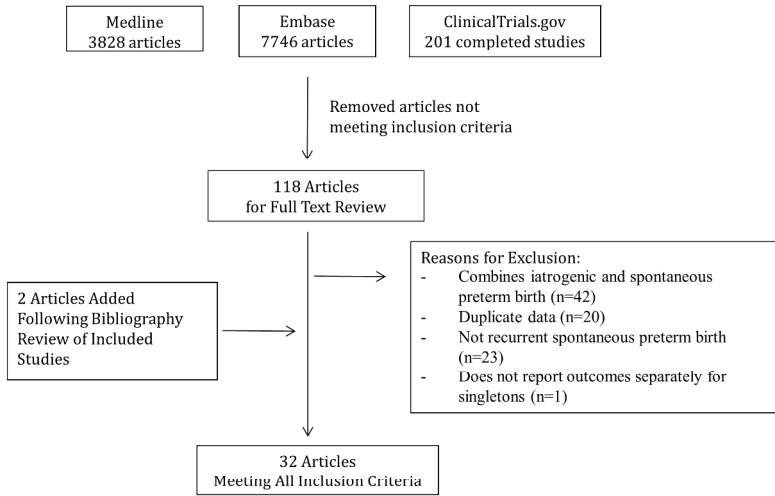

Figure 1: Flow diagram of included studies

254x190mm (300 x 300 DPI)

ew only

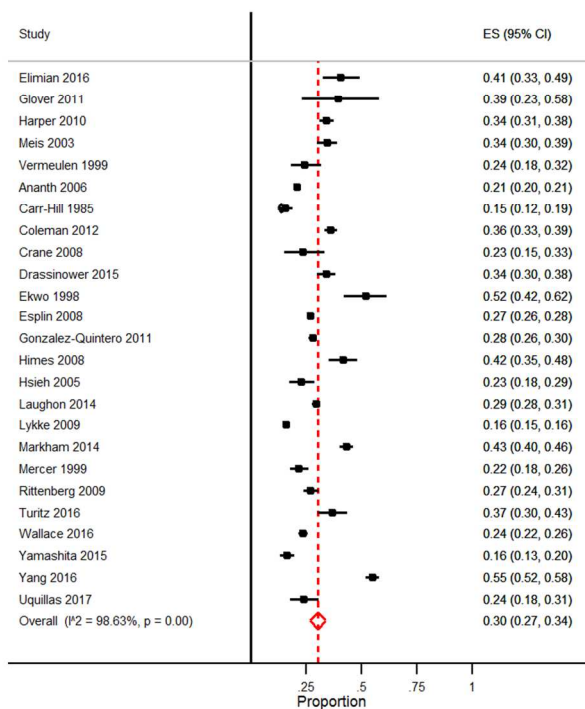

Figure 2. Forest plot of the rate of recurrent spontaneous preterm birth at <37 weeks gestation

254x190mm (300 x 300 DPI)

ew only

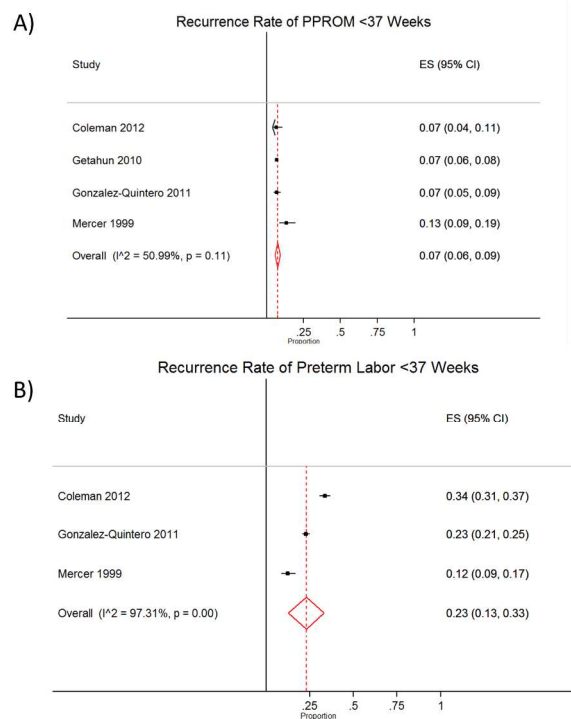

Figure 3. Forest plots of the rate of (a) recurrent PPROM and (b) recurrent PTL at <37 weeks gestation

254x190mm (300 x 300 DPI)

1  
2  
3 Appendix A. Search Strategy  
4  
5  
6

7 Search Strategy:

- 8 1. Premature Birth
  - 9 2. ((preterm or pre-term or premature or pre-mature) and (birth\* or childbirth\* or deliver\*  
10 or parturit\*))
  - 11 3. Fetal Membranes, Premature Rupture
  - 12 4. pprom
  - 13 5. Obstetric Labor, Premature
  - 14 6. ((preterm or pre-term or premature or pre-mature) and (labor or labour))
  - 15 7. Recurrence
  - 16 8. recur\* or repeat
  - 17 9. (1 or 2 or 3 or 4 or 5 or 6) and (7 or 8)
- 18  
19  
20  
21

22 Initial Search Run on June 17, 2015

23 Updated Search Run on July 29, 2016

24 Updated Search Run on May 24, 2017  
25  
26  
27  
28  
29  
30  
31  
32  
33  
34  
35  
36  
37  
38  
39  
40  
41  
42  
43  
44  
45  
46  
47  
48  
49  
50  
51  
52  
53  
54  
55  
56  
57  
58  
59  
60

1  
2  
3  
4  
5  
6  
7  
8  
9  
10  
11  
12  
13  
14  
15  
16  
17  
18  
19  
20  
21  
22  
23  
24  
25  
26  
27  
28  
29  
30  
31  
32  
33  
34  
35  
36  
37  
38  
39  
40  
41  
42  
43  
44  
45  
46  
47  
48  
49

Appendix B. Included studies

Table B1 – Recurrence rate of spontaneous preterm birth

| Author              | Time Period | Country | Study Design | Inclusion/Exclusion Criteria                                                                                                                                                                                                                                            | Gestational Age at Spontaneous Preterm Birth (weeks) |             | Recurrence Rate of Spontaneous Preterm Birth |
|---------------------|-------------|---------|--------------|-------------------------------------------------------------------------------------------------------------------------------------------------------------------------------------------------------------------------------------------------------------------------|------------------------------------------------------|-------------|----------------------------------------------|
|                     |             |         |              |                                                                                                                                                                                                                                                                         | Pregnancy 1                                          | Pregnancy 2 |                                              |
|                     |             |         |              |                                                                                                                                                                                                                                                                         | 1                                                    | 2           |                                              |
| Ananth 2006 (14)    | 1989-1997   | USA     | Cohort       | <i>Inclusion:</i> Prior sPTB<br><i>Exclusion:</i> Multiple gestation pregnancies                                                                                                                                                                                        | <37                                                  | <37         | 2,626/12,670 (20.7%)                         |
|                     |             |         |              |                                                                                                                                                                                                                                                                         |                                                      | <35         | 698/12,670 (5.5%)                            |
|                     |             |         |              |                                                                                                                                                                                                                                                                         |                                                      | <32         | 164/12,670 (1.3%)                            |
|                     |             |         |              |                                                                                                                                                                                                                                                                         | <35                                                  | <35         | 698/4,463 (15.6%)                            |
|                     |             |         |              |                                                                                                                                                                                                                                                                         | <32                                                  | <32         | 164/2,022 (8.1%)                             |
| Asrat 1991 (15)     |             | USA     | Cohort       | <i>Inclusion:</i> Prior PPRM<br><i>Exclusion:</i> Incompetent cervix, uterine anomalies, diethylstilbestrol exposure, multiple gestations, and neonates with congenital anomalies                                                                                       | <36                                                  | <36         | 39/121 (32.2%)                               |
| Care 2014 (16)      | 2010-2012   | UK      | Cohort       | <i>Inclusion:</i> Prior sPTB or PROM; cervical length >25mm at 20-24 weeks<br><i>Exclusion:</i> Prior cervical surgery, non-viable pregnancy, history of iPTB, cerclage, uterine anomalies, Ehlers-Danlos syndrome, intrauterine death, twins, congenital abnormalities | <34                                                  | <37         | 53/196 (27.0%)                               |
|                     |             |         |              |                                                                                                                                                                                                                                                                         |                                                      | <34         | 32/196 (16.3%)                               |
| Carr-Hill 1985 (17) | unspecified | UK      | Cohort       | <i>Inclusion:</i> Prior sPTB, singleton<br><i>Exclusion:</i> Multiple gestation, stillbirth, induced labor                                                                                                                                                              | <37                                                  | <37         | 76/494 (15.4%)                               |

| Author                | Time Period | Country | Study Design | Inclusion/Exclusion Criteria                                                                                                                                                                                                                                                                                               | Gestational Age at Spontaneous Preterm Birth (weeks) |             | Recurrence Rate of Spontaneous Preterm Birth |
|-----------------------|-------------|---------|--------------|----------------------------------------------------------------------------------------------------------------------------------------------------------------------------------------------------------------------------------------------------------------------------------------------------------------------------|------------------------------------------------------|-------------|----------------------------------------------|
|                       |             |         |              |                                                                                                                                                                                                                                                                                                                            | Pregnancy 1                                          | Pregnancy 2 |                                              |
|                       |             |         |              |                                                                                                                                                                                                                                                                                                                            | 1                                                    | 2           |                                              |
| Coleman 2012 (18)     | 2007-2010   | USA     | Cohort       | <i>Inclusion:</i> Prior sPTB, received 17P injections<br><i>Exclusion:</i> Non-compliance with 17P injections                                                                                                                                                                                                              | <37                                                  | <37         | 426/1,183 (36.0%)                            |
|                       |             |         |              |                                                                                                                                                                                                                                                                                                                            |                                                      | <35         | 156/1,183 (13.2%)                            |
|                       |             |         |              |                                                                                                                                                                                                                                                                                                                            |                                                      | <32         | 61/1,183 (5.2%)                              |
| Crane 2008 (19)       | 2000-2006   | Canada  | Cohort       | <i>Inclusion:</i> Prior sPTB<br><i>Exclusion:</i> Cervical cerclage                                                                                                                                                                                                                                                        | <37                                                  | <37         | 21/90 (23.3%)                                |
|                       |             |         |              |                                                                                                                                                                                                                                                                                                                            |                                                      | <35         | 11/90 (12.2%)                                |
|                       |             |         |              |                                                                                                                                                                                                                                                                                                                            |                                                      | <34         | 8/90 (8.9%)                                  |
| Drassinower 2015 (20) | 2009-2014   | USA     | Cohort       | <i>Inclusion:</i> Prior sPTB, singleton<br><i>Exclusion:</i> Multiple gestations, major fetal anomalies, cerclage, history of iPTB or placental abruption                                                                                                                                                                  | <37                                                  | <37         | 178/522 (34.1%)                              |
|                       |             |         |              |                                                                                                                                                                                                                                                                                                                            |                                                      | <34         | 78/522 (14.9%)                               |
|                       |             |         |              |                                                                                                                                                                                                                                                                                                                            |                                                      | <28         | 34/522 (6.5%)                                |
| Ekwo 1998 (21)        | 1988-1993   | USA     | Cohort       | <i>Inclusion:</i> Prior sPTB<br><i>Exclusion:</i> Fetal loss, multiple gestation                                                                                                                                                                                                                                           | <37                                                  | <37         | 56/108 (51.9%)                               |
| Elimian 2016 (22)     | 2007-2010   | USA     | RCT          | <i>Inclusion:</i> Prior sPTB<br><i>Exclusion:</i> Multiple gestation, major fetal anomaly or chromosomal anomalies, prior progesterone use in the current pregnancy, use of heparin in the current pregnancy, uterine anomaly, maternal medical conditions, no ultrasound before 20 <sup>+6</sup> in the current pregnancy | <37                                                  | <37         | 59/145 (40.7%)                               |
|                       |             |         |              |                                                                                                                                                                                                                                                                                                                            |                                                      | <34         | 27/145 (18.6%)                               |
|                       |             |         |              |                                                                                                                                                                                                                                                                                                                            |                                                      | <28         | 15/145 (10.3%)                               |
| Esplin 2008 (23)      | 1989-2001   | USA     | Cohort       | <i>Inclusion:</i> First live birth in Utah and a subsequent live birth in the study period                                                                                                                                                                                                                                 | <37                                                  | <37         | 1663/6,199 (26.8%)                           |
|                       |             |         |              |                                                                                                                                                                                                                                                                                                                            | <34                                                  | <37         | 587/1,669 (35.2%)                            |



1  
2  
3  
4  
5  
6  
7  
8  
9  
10  
11  
12  
13  
14  
15  
16  
17  
18  
19  
20  
21  
22  
23  
24  
25  
26  
27  
28  
29  
30  
31  
32  
33  
34  
35  
36  
37  
38  
39  
40  
41  
42  
43  
44  
45  
46  
47  
48  
49

| Author                           | Time Period | Country | Study Design | Inclusion/Exclusion Criteria                                                                                                                    | Gestational Age at Spontaneous Preterm Birth (weeks) |             | Recurrence Rate of Spontaneous Preterm Birth |
|----------------------------------|-------------|---------|--------------|-------------------------------------------------------------------------------------------------------------------------------------------------|------------------------------------------------------|-------------|----------------------------------------------|
|                                  |             |         |              |                                                                                                                                                 | Pregnancy 1                                          | Pregnancy 2 |                                              |
|                                  |             |         |              |                                                                                                                                                 |                                                      | <34         | 299/1,669 (17.9%)                            |
| Getahun 2010 (24)<br>*PPROM only | 1989-1997   | USA     | Cohort       | <i>Inclusion:</i> Prior PPRM<br><i>Exclusion:</i> Multiple gestations, births <20 weeks, non White or Black race, >1 pregnancy before 1989      | <37                                                  | <37         | 157/2,259 (6.9%)                             |
|                                  |             |         |              |                                                                                                                                                 | <34                                                  | <34         | 97/1,071 (9.1%)                              |
|                                  |             |         |              |                                                                                                                                                 | <32                                                  | <32         | 67/697 (9.6%)                                |
|                                  |             |         |              |                                                                                                                                                 | <28                                                  | <28         | 22/323 (6.8%)                                |
| Glover 2011 (25)                 | 2006-2009   | USA     | RCT          | <i>Inclusion:</i> Prior sPTB, initiated prenatal care prior to 20 weeks gestation<br><i>Exclusion:</i> Multiple gestations, major fetal anomaly | <37                                                  | <37         | 13/33 (39.4%)                                |
| Goldenberg 2006 (26)             | 1996-2001   | USA     | Cohort       | <i>Inclusion:</i> Prior sPTB                                                                                                                    | <32                                                  | <37         | 71/83 (85.5%)                                |
| Gonzalez-Quintero 2011 (27)      | 2006-2009   | USA     | Cohort       | <i>Inclusion:</i> Prior sPTB, singleton<br><i>Exclusion:</i> iPTB, >1 prior PTB, cerclage in current pregnancy                                  | <37                                                  | <37         | 597/2,123 (28.1%)                            |
|                                  |             |         |              |                                                                                                                                                 |                                                      | <35         | 274/2,123 (12.9%)                            |
|                                  |             |         |              |                                                                                                                                                 |                                                      | <32         | 113/2,123 (5.3%)                             |

| Author            | Time Period | Country | Study Design | Inclusion/Exclusion Criteria                                                                                                                                                                                                                                                                                                                                                                                                                                            | Gestational Age at Spontaneous Preterm Birth (weeks) |             | Recurrence Rate of Spontaneous Preterm Birth |
|-------------------|-------------|---------|--------------|-------------------------------------------------------------------------------------------------------------------------------------------------------------------------------------------------------------------------------------------------------------------------------------------------------------------------------------------------------------------------------------------------------------------------------------------------------------------------|------------------------------------------------------|-------------|----------------------------------------------|
|                   |             |         |              |                                                                                                                                                                                                                                                                                                                                                                                                                                                                         | Pregnancy 1                                          | Pregnancy 2 |                                              |
| Harper 2010 (28)  | 2005-2006   | USA     | RCT          | <i>Inclusion:</i> Prior sPTB, singleton<br><i>Exclusion:</i> Major fetal anomaly, intake of a fish oil supplement >500mg/week at any time during the preceding month, allergy to fish, anticoagulation therapy, hypertension, White's classification D or higher diabetes, drug or alcohol abuse, seizure disorder, uncontrolled thyroid disease, clotting disorder, current or planned cerclage, or a plan to deliver either elsewhere or before 37 weeks of gestation | <37                                                  | <37         | 292/852 (34.3%)                              |
| Himes 2008 (29)   | 2001-2006   | USA     | Cohort       | <i>Inclusion:</i> Prior sPTB placenta pathology information available                                                                                                                                                                                                                                                                                                                                                                                                   | <37                                                  | <37         | 102/245 (41.6%)                              |
| Hsieh 2005 (30)   | 1991-1997   | Taiwan  | Cohort       | <i>Exclusion:</i> Multiple gestation, fetal anomaly, cervical incompetence, stillbirth, iPTB                                                                                                                                                                                                                                                                                                                                                                            | <37                                                  | <37         | 52/228 (22.8%)                               |
| Laughon 2014 (31) | 2002-2010   | USA     | Cohort       | <i>Inclusion:</i> Singleton pregnancies                                                                                                                                                                                                                                                                                                                                                                                                                                 | <37                                                  | <37         | 921/3,139 (29.3%)                            |
| Lykke 2009 (32)   | 1978-2007   | Denmark | Cohort       | <i>Inclusion:</i> Maternal age between 15-50<br><i>Exclusion:</i> Women with cardiovascular disease, type 1 or 2 diabetes, women who emigrated within 3 months of 2nd delivery                                                                                                                                                                                                                                                                                          | <37                                                  | <37         | 2742/17,334 (15.8%)                          |
|                   |             |         |              |                                                                                                                                                                                                                                                                                                                                                                                                                                                                         | <33                                                  |             | 444/1,734 (25.6%)                            |
|                   |             |         |              |                                                                                                                                                                                                                                                                                                                                                                                                                                                                         | <28                                                  |             | 139/535 (26.0%)                              |

| Author            | Time Period | Country | Study Design | Inclusion/Exclusion Criteria                                                                                                                                                                                                                                                    | Gestational Age at Spontaneous Preterm Birth (weeks) |             | Recurrence Rate of Spontaneous Preterm Birth |
|-------------------|-------------|---------|--------------|---------------------------------------------------------------------------------------------------------------------------------------------------------------------------------------------------------------------------------------------------------------------------------|------------------------------------------------------|-------------|----------------------------------------------|
|                   |             |         |              |                                                                                                                                                                                                                                                                                 | Pregnancy 1                                          | Pregnancy 2 |                                              |
| Manuck 2011 (33)  | 2002-2010   | USA     | Cohort       | <i>Inclusion:</i> Prior sPTB, singleton<br><i>Exclusion:</i> History of iPTB or incompetent cervix                                                                                                                                                                              | <35                                                  | <37         | 131/223 (58.7%)                              |
|                   |             |         |              |                                                                                                                                                                                                                                                                                 |                                                      | <32         | 25/223 (11.2%)                               |
| Markham 2014 (34) | 1998-2012   | USA     | Cohort       | <i>Inclusion:</i> Prior sPTB<br><i>Exclusion:</i> Multiple gestations, known uterine anomalies,                                                                                                                                                                                 | <37                                                  | <37         | 459/1,066 (43.1%)                            |
|                   |             |         |              |                                                                                                                                                                                                                                                                                 |                                                      | <35         | 269/1,066 (25.2%)                            |
|                   |             |         |              |                                                                                                                                                                                                                                                                                 |                                                      | <32         | 139/1,066 (13.0%)                            |
| Meis 2003 (35)    | 1999-2002   | USA     | RCT          | <i>Inclusion:</i> Prior sPTB<br><i>Exclusion:</i> Multiple gestations, fetal anomaly, progesterone or heparin treatment during the current pregnancy, current or planned cervical cerclage, hypertension requiring medication, seizure disorder, or a plan to deliver elsewhere | <37                                                  | <37         | 159/463 (34.3%)                              |
| Mercer 1999 (36)  | 1992-1994   | USA     | Cohort       | <i>Inclusion:</i> Singleton<br><i>Exclusion:</i> Placenta previa, major fetal malformations, cervical cerclage, polyhydramnios, oligohydramnios, cervical dilatation of $\geq 2$ cm for nulliparous women and $\geq 3$ cm for multiparous women.                                | <37                                                  | <37         | 89/410 (21.7%)                               |
|                   |             |         |              |                                                                                                                                                                                                                                                                                 |                                                      | <35         | 55/410 (13.4%)                               |
|                   |             |         |              |                                                                                                                                                                                                                                                                                 |                                                      | <32         | 21/410 (5.1%)                                |
|                   |             |         |              |                                                                                                                                                                                                                                                                                 |                                                      | <30         | 12/410 (2.9%)                                |
|                   |             |         |              |                                                                                                                                                                                                                                                                                 |                                                      | <28         | 10/410 (2.4%)                                |
| Owen 2001 (37)    | 1997-1999   | USA     | Cohort       | <i>Inclusion:</i> Prior sPTB, singleton<br><i>Exclusion:</i> chronic medical or obstetrical problems, history of                                                                                                                                                                | <32                                                  | <35         | 48/183 (26.2%)                               |
|                   |             |         |              |                                                                                                                                                                                                                                                                                 |                                                      | <32         | 35/183 (19.1%)                               |
|                   |             |         |              |                                                                                                                                                                                                                                                                                 |                                                      | <28         | 29/183 (15.8%)                               |

| Author               | Time Period | Country     | Study Design | Inclusion/Exclusion Criteria                                                                                                                                                             | Gestational Age at Spontaneous Preterm Birth (weeks) |             | Recurrence Rate of Spontaneous Preterm Birth |
|----------------------|-------------|-------------|--------------|------------------------------------------------------------------------------------------------------------------------------------------------------------------------------------------|------------------------------------------------------|-------------|----------------------------------------------|
|                      |             |             |              |                                                                                                                                                                                          | Pregnancy 1                                          | Pregnancy 2 |                                              |
|                      |             |             |              | substance abuse, uterine anomalies, cerclage                                                                                                                                             |                                                      | <24         | 20/183 (10.9%)                               |
| Rittenberg 2009 (38) | 1995-2005   | USA         | Cohort       | <i>Inclusion:</i> Prior sPTB, singleton pregnancies, referred for weekly 17P administration<br><i>Exclusion:</i> Diagnosis of preterm labour, cerclage or vaginal bleeding at enrollment | <37                                                  | <37         | 185/684 (27.0%)                              |
|                      |             |             |              |                                                                                                                                                                                          |                                                      | <35         | 78/684 (11.4%)                               |
|                      |             |             |              |                                                                                                                                                                                          |                                                      | <32         | 30/684 (4.4%)                                |
| Turitz 2016 (39)     | 2009-2013   | USA         | Cohort       | <i>Inclusion:</i> Prior sPTB                                                                                                                                                             | <37                                                  | <37         | 80/218 (36.7%)                               |
| Uquillas 2017 (45)   | 2005-2011   | USA         | Cohort       | <i>Inclusion:</i> Prior sPTB<br><i>Exclusion:</i> Current cerclage, prior iPTB                                                                                                           | <37                                                  | <37         | 43/181 (23.7%)                               |
|                      |             |             |              |                                                                                                                                                                                          |                                                      | <32         | 6/181 (3.3%)                                 |
| Vermeulen 1999 (40)  | 1994-1996   | Netherlands | RCT          | <i>Inclusion:</i> Prior sPTB<br><i>Exclusion:</i> Fetal anomaly, previous iPTB, known allergy to clindamycin                                                                             | <37                                                  | <37         | 41/168 (24.4%)                               |
|                      |             |             |              |                                                                                                                                                                                          |                                                      | <34         | 14/168 (8.3%)                                |
| Vogel 2007 (41)      | 2000-2001   | USA         | Cohort       | <i>Inclusion:</i> Prior sPTB<br><i>Exclusion:</i> Multiple gestations, ruptured membranes, cerclage in a previous pregnancy                                                              | <30                                                  | <37         | 20/62 (32.3%)                                |
|                      |             |             |              |                                                                                                                                                                                          |                                                      | <35         | 15/62 (24.2%)                                |
| Wallace 2016 (42)    | 1986-2013   | UK          | Cohort       |                                                                                                                                                                                          | <37                                                  | <37         | 449/1,900 (23.6%)                            |
| Yamashita 2015 (43)  | 2008-2012   | Japan       | Cohort       | <i>Inclusion:</i> Prior sPTB<br><i>Exclusion:</i> First antenatal visit after                                                                                                            | <37                                                  | <37         | 89/547 (16.3%)                               |
|                      |             |             |              |                                                                                                                                                                                          |                                                      | <34         | 28/547 (5.1%)                                |

1  
2  
3  
4  
5  
6  
7  
8  
9  
10  
11  
12  
13  
14  
15  
16  
17  
18  
19  
20  
21  
22  
23  
24  
25  
26  
27  
28  
29  
30  
31  
32  
33  
34  
35  
36  
37  
38  
39  
40  
41  
42  
43  
44  
45  
46  
47  
48  
49

| Author         | Time Period | Country | Study Design | Inclusion/Exclusion Criteria                                                                                              | Gestational Age at Spontaneous Preterm Birth (weeks) |             | Recurrence Rate of Spontaneous Preterm Birth |
|----------------|-------------|---------|--------------|---------------------------------------------------------------------------------------------------------------------------|------------------------------------------------------|-------------|----------------------------------------------|
|                |             |         |              |                                                                                                                           | Pregnancy 1                                          | Pregnancy 2 |                                              |
|                |             |         |              | 14 weeks, previous iPTB, placenta previa, placental abruption, multiple gestation, fetal anomaly, antepartum fetal demise |                                                      | <28         | 10/547 (1.8%)                                |
| Yang 2016 (44) | 2005-2011   | USA     | Cohort       |                                                                                                                           | <37                                                  | <37         | 588/1,068 (55.1%)                            |
|                |             |         |              |                                                                                                                           |                                                      | <32         | 71/1,068 (6.6%)                              |
|                |             |         |              |                                                                                                                           | <32                                                  | <32         | 43/177 (24.3%)                               |

Table B2 – Occurrence of Indicated Preterm Birth Following Spontaneous Preterm Birth

| Author            | Time Period | Country | Study Design | Inclusion/Exclusion Criteria                                                                                                                                                                                                                                                                                                                                                                                                                                            | Gestational Age at Preterm Birth (weeks) |             | Occurrence Rate of Indicated Preterm Birth Following a Prior Spontaneous Preterm Birth |
|-------------------|-------------|---------|--------------|-------------------------------------------------------------------------------------------------------------------------------------------------------------------------------------------------------------------------------------------------------------------------------------------------------------------------------------------------------------------------------------------------------------------------------------------------------------------------|------------------------------------------|-------------|----------------------------------------------------------------------------------------|
|                   |             |         |              |                                                                                                                                                                                                                                                                                                                                                                                                                                                                         | Pregnancy 1                              | Pregnancy 2 |                                                                                        |
| Ananth 2006 (14)  | 1989-1997   | USA     | Cohort       | <i>Inclusion:</i> Prior sPTB<br><i>Exclusion:</i> Multiple gestation pregnancies                                                                                                                                                                                                                                                                                                                                                                                        | <37                                      | <37         | 342/12,670 (2.70%)                                                                     |
|                   |             |         |              |                                                                                                                                                                                                                                                                                                                                                                                                                                                                         |                                          | <35         | 121/12,670 (0.96%)                                                                     |
|                   |             |         |              |                                                                                                                                                                                                                                                                                                                                                                                                                                                                         |                                          | <32         | 40/12,670 (0.32%)                                                                      |
|                   |             |         |              |                                                                                                                                                                                                                                                                                                                                                                                                                                                                         | <35                                      | <35         | 121/4,463 (2.71%)                                                                      |
|                   |             |         |              |                                                                                                                                                                                                                                                                                                                                                                                                                                                                         | <32                                      | <32         | 40/2,022 (1.98%)                                                                       |
| Harper 2010 (28)  | 2005-2006   | USA     | RCT          | <i>Inclusion:</i> Prior sPTB, singleton<br><i>Exclusion:</i> Major fetal anomaly, intake of a fish oil supplement >500mg/week at any time during the preceding month, allergy to fish, anticoagulation therapy, hypertension, White's classification D or higher diabetes, drug or alcohol abuse, seizure disorder, uncontrolled thyroid disease, clotting disorder, current or planned cerclage, or a plan to deliver either elsewhere or before 37 weeks of gestation | <37                                      | <37         | 46/852 (5.63%)                                                                         |
| Laughon 2014 (31) | 2002-2010   | USA     | Cohort       | <i>Inclusion:</i> Singleton pregnancies                                                                                                                                                                                                                                                                                                                                                                                                                                 | <37                                      | <37         | 17/3,139 (0.54%)                                                                       |

1  
2  
3  
4  
5  
6  
7  
8  
9  
10  
11  
12  
13  
14  
15  
16  
17  
18  
19  
20  
21  
22  
23  
24  
25  
26  
27  
28  
29  
30  
31  
32  
33  
34  
35  
36  
37  
38  
39  
40  
41  
42  
43  
44  
45  
46  
47  
48  
49

| Author               | Time Period | Country | Study Design | Inclusion/Exclusion Criteria                                                                                                                                                                                                                                                    | Gestational Age at Preterm Birth (weeks) |     | Occurrence Rate of Indicated Preterm Birth Following a Prior Spontaneous Preterm Birth |
|----------------------|-------------|---------|--------------|---------------------------------------------------------------------------------------------------------------------------------------------------------------------------------------------------------------------------------------------------------------------------------|------------------------------------------|-----|----------------------------------------------------------------------------------------|
|                      |             |         |              |                                                                                                                                                                                                                                                                                 | 1                                        | 2   |                                                                                        |
| Meis 2003 (35)       | 1999-2002   | USA     | RCT          | <i>Inclusion:</i> Prior sPTB<br><i>Exclusion:</i> Multiple gestations, fetal anomaly, progesterone or heparin treatment during the current pregnancy, current or planned cervical cerclage, hypertension requiring medication, seizure disorder, or a plan to deliver elsewhere | <37                                      | <37 | 36/463 (7.78%)                                                                         |
| Owen 2001 (37)       | 1997-1999   | USA     | Cohort       | <i>Inclusion:</i> Prior sPTB, singleton<br><i>Exclusion:</i> chronic medical or obstetrical problems, history of substance abuse, uterine anomalies, cerclage                                                                                                                   | <32                                      | <35 | 5/183 (2.73%)                                                                          |
| Rittenberg 2009 (38) | 1995-2005   | USA     | Cohort       | <i>Inclusion:</i> Prior sPTB, singleton pregnancies, referred for weekly 17P administration<br><i>Exclusion:</i> Diagnosis of preterm labour, cerclage or vaginal bleeding at enrollment                                                                                        | <37                                      | <37 | 84/684 (12.28%)                                                                        |

| Author              | Time Period | Country | Study Design | Inclusion/Exclusion Criteria                                                                                                                                                                            | Gestational Age at Preterm Birth (weeks) |             | Occurrence Rate of Indicated Preterm Birth Following a Prior Spontaneous Preterm Birth |
|---------------------|-------------|---------|--------------|---------------------------------------------------------------------------------------------------------------------------------------------------------------------------------------------------------|------------------------------------------|-------------|----------------------------------------------------------------------------------------|
|                     |             |         |              |                                                                                                                                                                                                         | Pregnancy 1                              | Pregnancy 2 |                                                                                        |
| Yamashita 2015 (43) | 2008-2012   | Japan   | Cohort       | <i>Inclusion:</i> Prior sPTB<br><i>Exclusion:</i> First antenatal visit after 14 weeks, previous iPTB, placenta previa, placental abruption, multiple gestation, fetal anomaly, antepartum fetal demise | <37                                      | <37         | 23/547 (4.20%)                                                                         |



1  
2  
3  
4  
5  
6  
7  
8  
9  
10  
11  
12  
13  
14  
15  
16  
17  
18  
19  
20  
21  
22  
23  
24  
25  
26  
27  
28  
29  
30  
31  
32  
33  
34  
35  
36  
37  
38  
39  
40  
41  
42  
43  
44  
45  
46  
47  
48  
49

Appendix C: Quality Assessment

Table C1 – Quality Scores for Included Studies

| Author                                   | Representatives of the exposed cohort (0, 1) | Selection of the non-exposed cohort (0, 1) | Ascertainment of exposure (0, 1) | Demonstration that outcome of interest was not present at start of study (0, 1) | Comparability of cohorts on the basis of design or analysis (0, 1) | Assessment of outcome (0, 1) | Was follow-up long enough for outcomes to occur (0, 1) | Adequacy of follow-up of cohorts (0, 1) |
|------------------------------------------|----------------------------------------------|--------------------------------------------|----------------------------------|---------------------------------------------------------------------------------|--------------------------------------------------------------------|------------------------------|--------------------------------------------------------|-----------------------------------------|
| Ananth 2006 (14)<br><i>Score: 4/6</i>    | 1                                            | N/A                                        | 0                                | 1                                                                               | N/A                                                                | 0                            | 1                                                      | 1                                       |
| Asrat 1991 (15)<br><i>Score: 5/6</i>     | 0                                            | N/A                                        | 1                                | 1                                                                               | N/A                                                                | 1                            | 1                                                      | 1                                       |
| Care 2014 (16)<br><i>Score: 5/6</i>      | 0                                            | N/A                                        | 1                                | 1                                                                               | N/A                                                                | 1                            | 1                                                      | 1                                       |
| Carr-Hill 1985 (17)<br><i>Score: 4/6</i> | 1                                            | N/A                                        | 0                                | 1                                                                               | N/A                                                                | 0                            | 1                                                      | 1                                       |
| Coleman 2012 (18)<br><i>Score: 5/6</i>   | 0                                            | N/A                                        | 1                                | 1                                                                               | N/A                                                                | 1                            | 1                                                      | 1                                       |
| Crane 2008 (19)<br><i>Score: 5/6</i>     | 0                                            | N/A                                        | 1                                | 1                                                                               | N/A                                                                | 1                            | 1                                                      | 1                                       |

| Author                                         | Representatives of the exposed cohort (0, 1) | Selection of the non-exposed cohort (0, 1) | Ascertainment of exposure (0, 1) | Demonstration that outcome of interest was not present at start of study (0, 1) | Comparability of cohorts on the basis of design or analysis (0, 1) | Assessment of outcome (0, 1) | Was follow-up long enough for outcomes to occur (0, 1) | Adequacy of follow-up of cohorts (0, 1) |
|------------------------------------------------|----------------------------------------------|--------------------------------------------|----------------------------------|---------------------------------------------------------------------------------|--------------------------------------------------------------------|------------------------------|--------------------------------------------------------|-----------------------------------------|
| Drassinower 2015 (20)<br>Score: 5/6            | 0                                            | N/A                                        | 1                                | 1                                                                               | N/A                                                                | 1                            | 1                                                      | 1                                       |
| Ekwo 1998 (21)<br>Score: 5/6                   | 0                                            | N/A                                        | 1                                | 1                                                                               | N/A                                                                | 1                            | 1                                                      | 1                                       |
| Elimian 2016 (22)<br>Score: 7/8                | 0                                            | 1                                          | 1                                | 1                                                                               | 1                                                                  | 1                            | 1                                                      | 1                                       |
| Esplin 2008 (23)<br>Score: 4/6                 | 1                                            | N/A                                        | 0                                | 1                                                                               | N/A                                                                | 0                            | 1                                                      | 1                                       |
| Getahun 2010 (24)<br>*PPROM only<br>Score: 4/6 | 1                                            | N/A                                        | 0                                | 1                                                                               | N/A                                                                | 0                            | 1                                                      | 1                                       |
| Goldenberg 2006 (26)<br>Score: 5/6             | 0                                            | N/A                                        | 1                                | 1                                                                               | N/A                                                                | 1                            | 1                                                      | 1                                       |
| Glover 2011 (25)<br>Score: 7/8                 | 0                                            | 1                                          | 1                                | 1                                                                               | 1                                                                  | 1                            | 1                                                      | 1                                       |

1  
2  
3  
4  
5  
6  
7  
8  
9  
10  
11  
12  
13  
14  
15  
16  
17  
18  
19  
20  
21  
22  
23  
24  
25  
26  
27  
28  
29  
30  
31  
32  
33  
34  
35  
36  
37  
38  
39  
40  
41  
42  
43  
44  
45  
46  
47  
48  
49

| Author                                           | Representatives of the exposed cohort (0, 1) | Selection of the non-exposed cohort (0, 1) | Ascertainment of exposure (0, 1) | Demonstration that outcome of interest was not present at start of study (0, 1) | Comparability of cohorts on the basis of design or analysis (0, 1) | Assessment of outcome (0, 1) | Was follow-up long enough for outcomes to occur (0, 1) | Adequacy of follow-up of cohorts (0, 1) |
|--------------------------------------------------|----------------------------------------------|--------------------------------------------|----------------------------------|---------------------------------------------------------------------------------|--------------------------------------------------------------------|------------------------------|--------------------------------------------------------|-----------------------------------------|
| Gonzalez-Quintero 2011 (27)<br><i>Score: 5/6</i> | 0                                            | N/A                                        | 1                                | 1                                                                               | N/A                                                                | 1                            | 1                                                      | 1                                       |
| Harper 2010 (28)<br><i>Score: 7/8</i>            | 0                                            | 1                                          | 1                                | 1                                                                               | 1                                                                  | 1                            | 1                                                      | 1                                       |
| Himes 2008 (29)<br><i>Score: 5/6</i>             | 0                                            | N/A                                        | 1                                | 1                                                                               | N/A                                                                | 1                            | 1                                                      | 1                                       |
| Hsieh 2005 (30)<br><i>Score: 5/6</i>             | 0                                            | N/A                                        | 1                                | 1                                                                               | N/A                                                                | 1                            | 1                                                      | 1                                       |
| Laughon 2014 (31)<br><i>Score: 4/6</i>           | 1                                            | N/A                                        | 0                                | 1                                                                               | N/A                                                                | 0                            | 1                                                      | 1                                       |
| Lykke 2009 (32)<br><i>Score: 4/6</i>             | 1                                            | N/A                                        | 0                                | 1                                                                               | N/A                                                                | 0                            | 1                                                      | 1                                       |
| Manuck 2011 (33)<br><i>Score: 5/6</i>            | 0                                            | N/A                                        | 1                                | 1                                                                               | N/A                                                                | 1                            | 1                                                      | 1                                       |

| Author                                    | Representatives of the exposed cohort (0, 1) | Selection of the non-exposed cohort (0, 1) | Ascertainment of exposure (0, 1) | Demonstration that outcome of interest was not present at start of study (0, 1) | Comparability of cohorts on the basis of design or analysis (0, 1) | Assessment of outcome (0, 1) | Was follow-up long enough for outcomes to occur (0, 1) | Adequacy of follow-up of cohorts (0, 1) |
|-------------------------------------------|----------------------------------------------|--------------------------------------------|----------------------------------|---------------------------------------------------------------------------------|--------------------------------------------------------------------|------------------------------|--------------------------------------------------------|-----------------------------------------|
| Markham 2014 (34)<br><i>Score: 5/6</i>    | 0                                            | N/A                                        | 1                                | 1                                                                               | N/A                                                                | 1                            | 1                                                      | 1                                       |
| Meis 2003 (35)<br><i>Score: 7/8</i>       | 0                                            | 1                                          | 1                                | 1                                                                               | 1                                                                  | 1                            | 1                                                      | 1                                       |
| Mercer 1999 (36)<br><i>Score: 5/6</i>     | 0                                            | N/A                                        | 1                                | 1                                                                               | N/A                                                                | 1                            | 1                                                      | 1                                       |
| Owen 2001 (37)<br><i>Score: 5/6</i>       | 0                                            | N/A                                        | 1                                | 1                                                                               | N/A                                                                | 1                            | 1                                                      | 1                                       |
| Rittenberg 2009 (38)<br><i>Score: 5/6</i> | 0                                            | N/A                                        | 1                                | 1                                                                               | N/A                                                                | 1                            | 1                                                      | 1                                       |
| Turitz 2016 (39)<br><i>Score: 5/6</i>     | 0                                            | N/A                                        | 1                                | 1                                                                               | N/A                                                                | 1                            | 1                                                      | 1                                       |
| Uquillas 2017 (45)<br><i>Score: 5/6</i>   | 0                                            | N/A                                        | 1                                | 1                                                                               | N/A                                                                | 1                            | 1                                                      | 1                                       |

1  
2  
3  
4  
5  
6  
7  
8  
9  
10  
11  
12  
13  
14  
15  
16  
17  
18  
19  
20  
21  
22  
23  
24  
25  
26  
27  
28  
29  
30  
31  
32  
33  
34  
35  
36  
37  
38  
39  
40  
41  
42  
43  
44  
45  
46  
47  
48  
49

| Author                            | Representatives of the exposed cohort (0, 1) | Selection of the non-exposed cohort (0, 1) | Ascertainment of exposure (0, 1) | Demonstration that outcome of interest was not present at start of study (0, 1) | Comparability of cohorts on the basis of design or analysis (0, 1) | Assessment of outcome (0, 1) | Was follow-up long enough for outcomes to occur (0, 1) | Adequacy of follow-up of cohorts (0, 1) |
|-----------------------------------|----------------------------------------------|--------------------------------------------|----------------------------------|---------------------------------------------------------------------------------|--------------------------------------------------------------------|------------------------------|--------------------------------------------------------|-----------------------------------------|
| Vermeulen 1999 (40)<br>Score: 7/8 | 0                                            | 1                                          | 1                                | 1                                                                               | 1                                                                  | 1                            | 1                                                      | 1                                       |
| Vogel 2007 (41)<br>Score: 5/6     | 0                                            | N/A                                        | 1                                | 1                                                                               | N/A                                                                | 1                            | 1                                                      | 1                                       |
| Wallace 2016 (42)<br>Score: 4/6   | 1                                            | N/A                                        | 0                                | 1                                                                               | N/A                                                                | 0                            | 1                                                      | 1                                       |
| Yamashita 2015 (43)<br>Score: 5/6 | 0                                            | N/A                                        | 1                                | 1                                                                               | N/A                                                                | 1                            | 1                                                      | 1                                       |
| Yang 2016 (44)<br>Score: 4/6      | 1                                            | N/A                                        | 0                                | 1                                                                               | N/A                                                                | 0                            | 1                                                      | 1                                       |



# PRISMA 2009 Checklist

| Section/topic                      | #  | Checklist item                                                                                                                                                                                                                                                                                              | Reported on page # |
|------------------------------------|----|-------------------------------------------------------------------------------------------------------------------------------------------------------------------------------------------------------------------------------------------------------------------------------------------------------------|--------------------|
| <b>TITLE</b>                       |    |                                                                                                                                                                                                                                                                                                             |                    |
| Title                              | 1  | Identify the report as a systematic review, meta-analysis, or both.                                                                                                                                                                                                                                         | 1                  |
| <b>ABSTRACT</b>                    |    |                                                                                                                                                                                                                                                                                                             |                    |
| Structured summary                 | 2  | Provide a structured summary including, as applicable: background; objectives; data sources; study eligibility criteria, participants, and interventions; study appraisal and synthesis methods; results; limitations; conclusions and implications of key findings; systematic review registration number. | 3                  |
| <b>INTRODUCTION</b>                |    |                                                                                                                                                                                                                                                                                                             |                    |
| Rationale                          | 3  | Describe the rationale for the review in the context of what is already known.                                                                                                                                                                                                                              | 5-6                |
| Objectives                         | 4  | Provide an explicit statement of questions being addressed with reference to participants, interventions, comparisons, outcomes, and study design (PICOS).                                                                                                                                                  | 6                  |
| <b>METHODS</b>                     |    |                                                                                                                                                                                                                                                                                                             |                    |
| Protocol and registration          | 5  | Indicate if a review protocol exists, if and where it can be accessed (e.g., Web address), and, if available, provide registration information including registration number.                                                                                                                               | n/a                |
| Eligibility criteria               | 6  | Specify study characteristics (e.g., PICOS, length of follow-up) and report characteristics (e.g., years considered, language, publication status) used as criteria for eligibility, giving rationale.                                                                                                      | 6-8                |
| Information sources                | 7  | Describe all information sources (e.g., databases with dates of coverage, contact with study authors to identify additional studies) in the search and date last searched.                                                                                                                                  | 6                  |
| Search                             | 8  | Present full electronic search strategy for at least one database, including any limits used, such that it could be repeated.                                                                                                                                                                               | Appendix A         |
| Study selection                    | 9  | State the process for selecting studies (i.e., screening, eligibility, included in systematic review, and, if applicable, included in the meta-analysis).                                                                                                                                                   | 7                  |
| Data collection process            | 10 | Describe method of data extraction from reports (e.g., piloted forms, independently, in duplicate) and any processes for obtaining and confirming data from investigators.                                                                                                                                  | 7                  |
| Data items                         | 11 | List and define all variables for which data were sought (e.g., PICOS, funding sources) and any assumptions and simplifications made.                                                                                                                                                                       | 7-8                |
| Risk of bias in individual studies | 12 | Describe methods used for assessing risk of bias of individual studies (including specification of whether this was done at the study or outcome level), and how this information is to be used in any data synthesis.                                                                                      | 7-8                |
| Summary measures                   | 13 | State the principal summary measures (e.g., risk ratio, difference in means).                                                                                                                                                                                                                               | 8                  |
| Synthesis of results               | 14 | Describe the methods of handling data and combining results of studies, if done, including measures of consistency (e.g., $I^2$ ) for each meta-analysis.                                                                                                                                                   | 8                  |



## PRISMA 2009 Checklist

Page 1 of 2

| Section/topic                                                                                                                              | #  | Checklist item                                                                                                                                                                                           | Reported on page #     |
|--------------------------------------------------------------------------------------------------------------------------------------------|----|----------------------------------------------------------------------------------------------------------------------------------------------------------------------------------------------------------|------------------------|
| Risk of bias across studies                                                                                                                | 15 | Specify any assessment of risk of bias that may affect the cumulative evidence (e.g., publication bias, selective reporting within studies).                                                             | 7-8                    |
| Additional analyses                                                                                                                        | 16 | Describe methods of additional analyses (e.g., sensitivity or subgroup analyses, meta-regression), if done, indicating which were pre-specified.                                                         | 8                      |
| <b>RESULTS</b>                                                                                                                             |    |                                                                                                                                                                                                          |                        |
| Study selection                                                                                                                            | 17 | Give numbers of studies screened, assessed for eligibility, and included in the review, with reasons for exclusions at each stage, ideally with a flow diagram.                                          | Figure 1, page 8       |
| Study characteristics                                                                                                                      | 18 | For each study, present characteristics for which data were extracted (e.g., study size, PICOS, follow-up period) and provide the citations.                                                             | Appendix B             |
| Risk of bias within studies                                                                                                                | 19 | Present data on risk of bias of each study and, if available, any outcome level assessment (see item 12).                                                                                                | Appendix C, pages 9-10 |
| Results of individual studies                                                                                                              | 20 | For all outcomes considered (benefits or harms), present, for each study: (a) simple summary data for each intervention group (b) effect estimates and confidence intervals, ideally with a forest plot. | Figures 2, 3, page 8-9 |
| Synthesis of results                                                                                                                       | 21 | Present results of each meta-analysis done, including confidence intervals and measures of consistency.                                                                                                  | Figures 2, 3, page 8-9 |
| Risk of bias across studies                                                                                                                | 22 | Present results of any assessment of risk of bias across studies (see Item 15).                                                                                                                          | Appendix C, pages 9-10 |
| Additional analysis                                                                                                                        | 23 | Give results of additional analyses, if done (e.g., sensitivity or subgroup analyses, meta-regression [see Item 16]).                                                                                    | 9                      |
| <b>DISCUSSION</b>                                                                                                                          |    |                                                                                                                                                                                                          |                        |
| Summary of evidence                                                                                                                        | 24 | Summarize the main findings including the strength of evidence for each main outcome; consider their relevance to key groups (e.g., healthcare providers, users, and policy makers).                     | 10                     |
| Limitations                                                                                                                                | 25 | Discuss limitations at study and outcome level (e.g., risk of bias), and at review-level (e.g., incomplete retrieval of identified research, reporting bias).                                            | 12-13                  |
| Conclusions                                                                                                                                | 26 | Provide a general interpretation of the results in the context of other evidence, and implications for future research.                                                                                  | 13                     |
| <b>FUNDING</b>                                                                                                                             |    |                                                                                                                                                                                                          |                        |
| For peer review only - <a href="http://bmjopen.bmj.com/site/about/guidelines.xhtml">http://bmjopen.bmj.com/site/about/guidelines.xhtml</a> |    |                                                                                                                                                                                                          |                        |



## PRISMA 2009 Checklist

1  
2  
3  
4  
5  
6  
7  
8  
9  
10  
11  
12  
13  
14  
15  
16  
17  
18  
19  
20  
21  
22  
23  
24  
25  
26  
27  
28  
29  
30  
31  
32  
33  
34  
35  
36  
37  
38  
39  
40  
41  
42  
43  
44  
45  
46  
47  
48  
49

|         |    |                                                                                                                                            |   |
|---------|----|--------------------------------------------------------------------------------------------------------------------------------------------|---|
| Funding | 27 | Describe sources of funding for the systematic review and other support (e.g., supply of data); role of funders for the systematic review. | 2 |
|---------|----|--------------------------------------------------------------------------------------------------------------------------------------------|---|

From: Moher D, Liberati A, Tetzlaff J, Altman DG, The PRISMA Group (2009). Preferred Reporting Items for Systematic Reviews and Meta-Analyses: The PRISMA Statement. PLoS Med 6(7): e1000097. doi:10.1371/journal.pmed1000097

For more information, visit: [www.prisma-statement.org](http://www.prisma-statement.org).

Page 2 of 2

For peer review only
